# Supplementary material for: Scn1a-GFP transgenic mouse revealed Nav1.1 expression in neocortical pyramidal tract projection neurons
Source: eLife journal article supplement (doi:10.7554/elife.87495), 2023-05-10

Figure 2-figure supplement 2-source data1-1

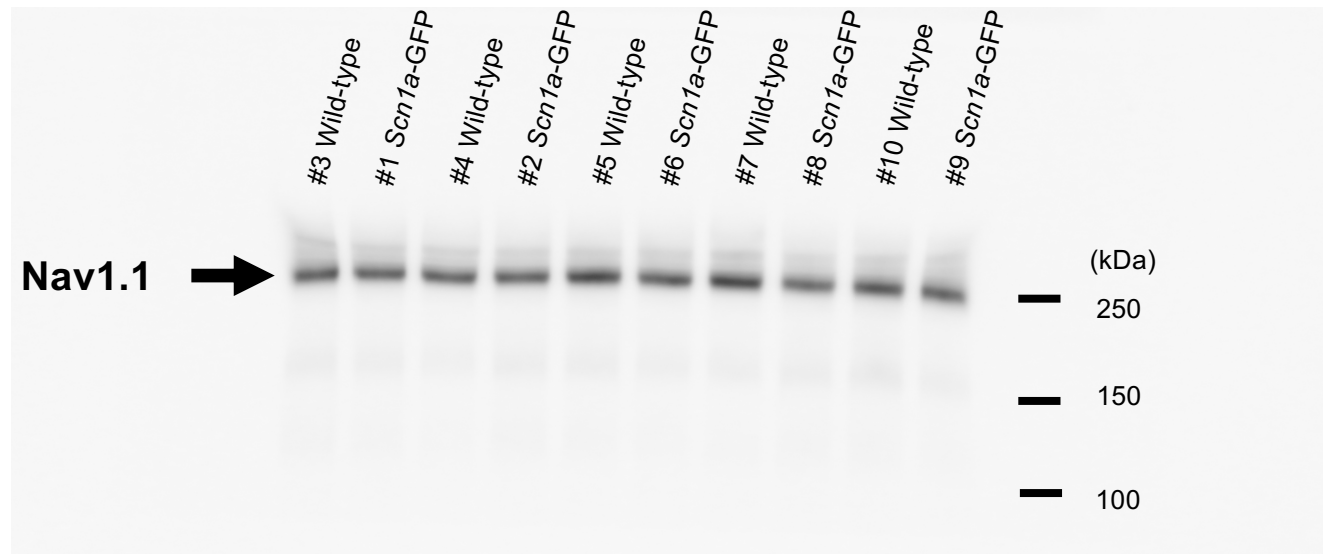

Figure 2-figure supplement 2-source data1-2

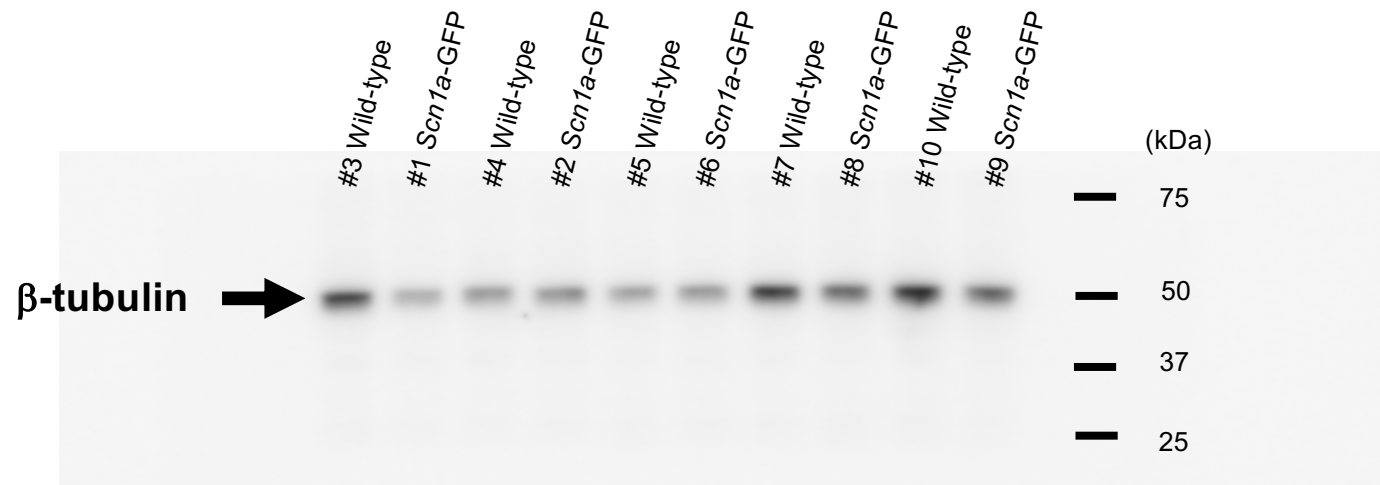

Figure 2-figure supplement 2-source data1-3

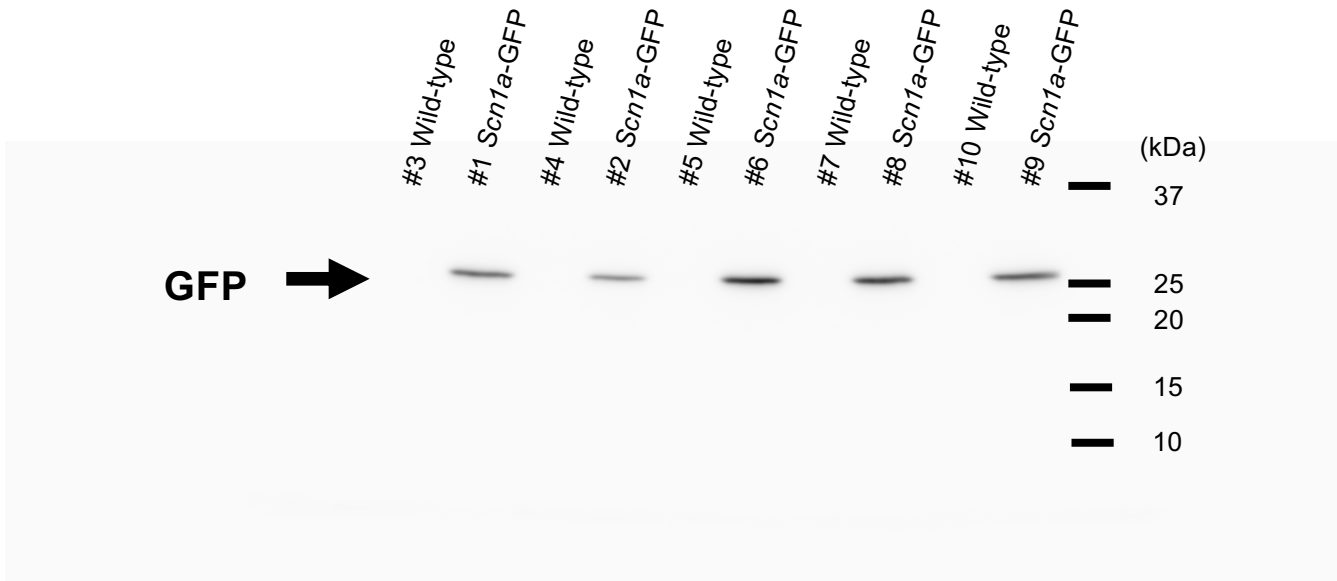

Figure 2-figure supplement 2-source data1-4

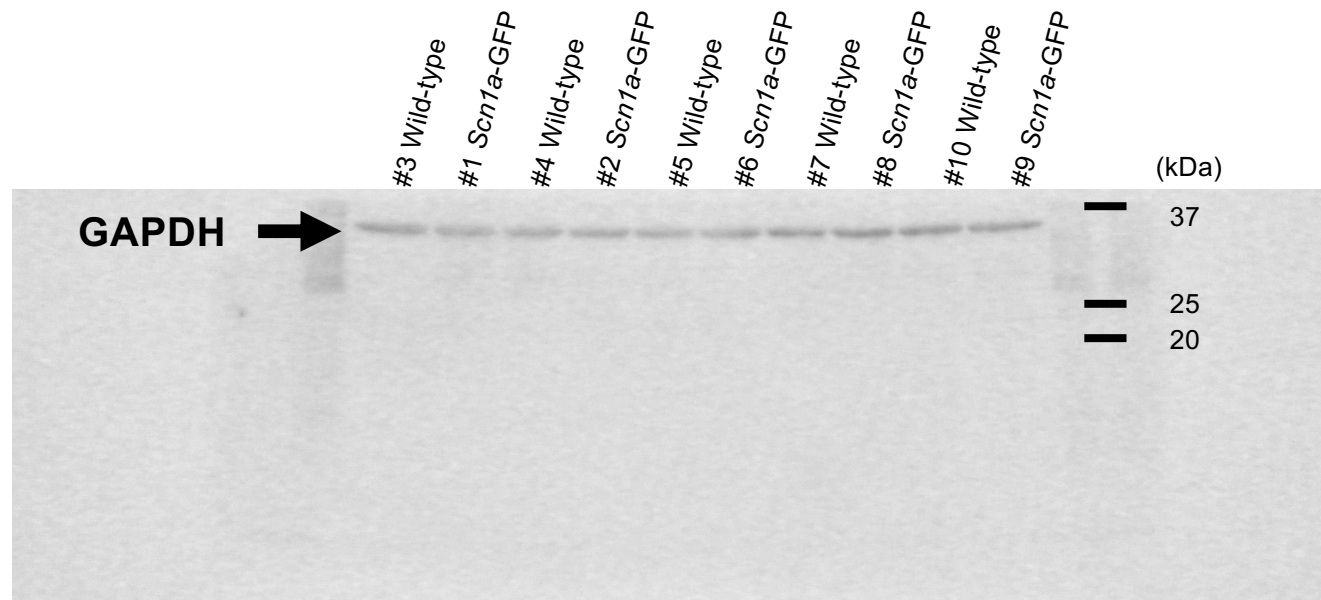

Supplement: fig2-figsupp2-data1 [file elife-87495-fig2-figsupp2-data1-v1.zip]
