# Supplementary material for: Scn1a-GFP transgenic mouse revealed Nav1.1 expression in neocortical pyramidal tract projection neurons
Source: eLife. 2023 May 23;12:e87495. doi: 10.7554/eLife.87495 (PMC10205085; doi:10.7554/eLife.87495)
Supplement: Figure 2—figure supplement 2—source data 2. [file elife-87495-fig2-figsupp2-data2.xlsx]

## Sheet: Fig2_figure_supplement2
					Nav1.1	Signal	Bkgnd.
					1A-GFP_10	355000	33	130906
					WT_5	313000	38	297855
					1A-GFP_8	352000	34	271477
					WT_4	377000	29	240465
					1A-GFP_6	385000	41	385000
					WT_3	349000	36	292071
					1A-GFP_4	397000	40	158800
					WT_2	312000	35	174483
					1A-GFP_2	340000	41	128590
					WT_1	351000	30.5	176247
					TUBB	Signal	Bkgnd.
					1A-GFP_10	320000	31	2.71186
					WT_5	124000	18	1.05085
					1A-GFP_8	153000	24	1.29661
					WT_4	185000	22	1.5678
					1A-GFP_6	118000	21	1
					WT_3	141000	21	1.19492
					1A-GFP_4	295000	30	2.5
					WT_2	211000	26	1.78814
					1A-GFP_2	312000	36	2.64407
					WT_1	235000	31	1.99153
						Supplementary figure S3 A
								297855	WT_5	126.09	130906	1A-GFP_10	55.4161
								240465	WT_4	101.795	271477	1A-GFP_8	114.924
								292071	WT_3	123.641	385000	1A-GFP_6	162.981
								174483	WT_2	73.8635	158800	1A-GFP_4	67.2243
								176247	WT_1	74.61	128590	1A-GFP_2	54.4355
								236224		100	214955		90.996
								T-test	0.716969
									Wild type	Scn1a-GFP
								Ave.	100	91.1148
								SD	25.3505	47.2282
								N	5	5
								SEM	11.3371	21.1211
					GFP	Signal	Bkgnd.
					1A-GFP_10	194000	17	122352
					1A-GFP_8	125000	11	77949.4
					1A-GFP_6	286000	22	238692
					1A-GFP_4	265000	19	226269
					1A-GFP_2	243000	18	243000
					WT_5	931	5	543.9
					WT_4	1260	5	885.19
					WT_3	1100	5	1071.05
					WT_2	3940	5	3770.17
					WT_1	1220	5	752.333
					GAPDH	Signal	Bkgnd.
					1A-GFP_10	176000	81	1.58559
					WT_5	190000	80	1.71171
					1A-GFP_8	178000	82	1.6036
					WT_4	158000	80	1.42342
					1A-GFP_6	133000	79	1.1982
					WT_3	114000	79	1.02703
					1A-GFP_4	130000	79	1.17117
					WT_2	116000	82	1.04505
					1A-GFP_2	111000	86	1
					WT_1	180000	83	1.62162
									Supplementary figure S3 B
											122352	1.56964		1A-GFP_10
											77949.4	1		1A-GFP_8
											238692	3.06214		1A-GFP_6
											226269	2.90277		1A-GFP_4
											243000	3.11741		1A-GFP_2
												GFP
											SD	0.978666
											N	5
											SEM	0.437673
