# Supplementary material for: Scn1a-GFP transgenic mouse revealed Nav1.1 expression in neocortical pyramidal tract projection neurons
Source: eLife. 2023 May 23;12:e87495. doi: 10.7554/eLife.87495 (PMC10205085; doi:10.7554/eLife.87495)
Supplement: Figure 3—figure supplement 2—source data 1. [file elife-87495-fig3-figsupp2-data1.xlsx]

## Sheet: 4R1
P15	Ctx M1		NeuN+	NeuN+,GFP+	NeuN+,GFP-		%GFP+/NeuN+					Ctx M1		GFP+	GFP+,NeuN+	GFP+,NeuN-		%NeuN+/GFP+			Total cell Num	% GFP+	%GFP+,NeuN+	NeuN+
line233	L2/3	1st	228	64	164		28.0702					L2/3	1st	83	64	19		77.1084			247	7.69231	25.9109	66.3968
4R1		2nd	243	68	175		27.9835						2nd	90	68	22		75.5556			265	8.30189	25.6604	66.0377
		3rd	242	53	198		21.9008						3rd	72	53	19		73.6111			261	7.27969	20.3065	75.8621
		SUM	713	185	537	Ave.	25.9848						SUM	245	185	60	Ave.	75.425			Ave.	7.75796	23.9593	69.4322
						SD	3.53713										SD	1.75231
						SEM	2.04216										SEM	1.0117
	L5	1st	117	41	76		35.0427					L5	1st	52	41	11		78.8462			128	8.59375	32.0312	59.375
		2nd	161	37	124		22.9814						2nd	55	37	18		67.2727			179	10.0559	20.6704	69.2737
		3rd	186	52	134		27.957						3rd	64	52	8		81.25			194	4.12371	26.8041	69.0722
		SUM	464	130	334	Ave.	28.6604						SUM	171	130	37	Ave.	75.7896			Ave.	7.59111	26.5019	65.907
						SD	6.06137										SD	7.47314
						SEM	3.09577										SEM	7.04412
	L6	1st	247	46	201		18.6235					L6	1st	61	46	15		75.4098			262	5.72519	17.5573	76.7176
		2nd	209	41	168		19.6172						2nd	64	41	23		64.0625			232	9.91379	17.6724	72.4138
		3rd	240	57	183		23.75						3rd	68	57	11		83.8235			251	4.38247	22.7092	72.9084
		SUM	696	144	552	Ave.	20.6636						SUM	193	144	49	Ave.	74.432			Ave.	6.67382	19.3129	74.0132
						SD	2.71872										SD	9.91674
						SEM	2.14867										SEM	9.88455
					311											92
					269											94
					309											84
	Ctx S1		NeuN+	NeuN+,GFP+	NeuN+,GFP-		%TOM+/GFP+					Ctx S1		GFP+	GFP+,NeuN+	GFP+,NeuN-		%GFP+/TOM+
	L2/3	1st	311	71	240		22.8296					L2/3	1st	92	71	21		77.1739			332	6.3253	21.3855	72.2892
		2nd	269	71	198		26.3941						2nd	94	71	23		75.5319			292	7.87671	24.3151	67.8082
		3rd	309	67	242		21.6828						3rd	84	67	17		79.7619			326	5.21472	20.5521	74.2331
		SUM	889	209	680	Ave.	23.6355						SUM	270	209	61	Ave.	77.4892			Ave.	6.47225	22.0843	71.4435
						SD	2.45682										SD	2.13255
					185	SEM	1.41845									79	SEM	1.23123
					182											71
					162											55
	L5	1st	185	56	129		30.2703					L5	1st	79	56	23		70.8861			208	11.0577	26.9231	62.0192
		2nd	182	57	125		31.3187						2nd	71	57	14		80.2817			196	7.14286	29.0816	63.7755
		3rd	162	42	120		25.9259						3rd	55	42	13		76.3636			175	7.42857	24	68.5714
		SUM	529	155	374	Ave.	29.1716						SUM	205	155	50	Ave.	75.8438			Ave.	8.54304	26.6682	64.7887
						SD	2.85932										SD	4.71933
						SEM	2.71497										SEM	2.42612
	L6	1st	212	39	173		18.3962					L6	1st	48	39	9		81.25			221	4.0724	17.6471	78.2805
		2nd	206	40	166		19.4175						2nd	54	40	14		74.0741			220	6.36364	18.1818	75.4545
		3rd	194	21	173		10.8247						3rd	36	31	15		86.1111			209	7.17703	10.0478	82.7751
		SUM	612	100	512	Ave.	16.2128						SUM	138	110	38	Ave.	80.4784			Ave.	5.87102	15.2922	78.8367
						SD	4.69406										SD	6.0555
						SEM	4.34235										SEM	6.02264

## Sheet: 6R
P15	Ctx M1		NeuN+	NeuN+,GFP+	NeuN+,GFP-		%GFP+/NeuN+					Ctx M1		GFP+	GFP+,NeuN+	GFP+,NeuN-		%NeuN+/GFP+			Total cell Num	% GFP+	%GFP+,NeuN+	NeuN+
line233	L2/3	1st	313	81	232		25.8786					L2/3	1st	99	81	18		81.8182			331	5.43807	24.4713	70.0906
6R		2nd	317	74	243		23.3438						2nd	100	74	26		74			343	7.58017	21.5743	70.8455
		3rd	291	65	226		22.3368						3rd	86	65	21		75.5814			312	6.73077	20.8333	72.4359
		SUM	921	220	701	Ave.	23.8531						SUM	285	220	65	Ave.	77.1332			Ave.	6.583	22.293	71.124
						SD	1.825										SD	4.13365
						SEM	1.05366										SEM	2.38656
	L5	1st	224	51	173		22.7679					L5	1st	70	51	19		72.8571			243	7.81893	20.9877	71.1934
		2nd	184	42	141		22.8261						2nd	54	42	12		77.7778			196	6.12245	21.4286	71.9388
		3rd	190	38	150		20						3rd	70	38	32		54.2857			222	14.4144	17.1171	67.5676
		SUM	598	131	464	Ave.	21.8646						SUM	194	131	63	Ave.	68.3069			Ave.	9.45193	19.8444	70.2333
						SD	1.6151										SD	12.3894
						SEM	1.4369										SEM	11.8193
	L6	1st	323	36	287		11.1455					L6	1st	56	36	20		64.2857			343	5.8309	10.4956	83.6735
		2nd	274	32	242		11.6788						2nd	50	32	18		64			292	6.16438	10.9589	82.8767
		3rd	298	43	255		14.4295						3rd	70	43	27		61.4286			325	8.30769	13.2308	78.4615
		SUM	895	111	784	Ave.	12.418						SUM	176	111	65	Ave.	63.2381			Ave.	6.76766	11.5618	81.6706
						SD	1.76236										SD	1.57359
						SEM	1.42356										SEM	1.3208
					342											77
					318											81
					335											99
	Ctx S1		NeuN+	NeuN+,GFP+	NeuN+,GFP-		%TOM+/GFP+					Ctx S1		GFP+	GFP+,NeuN+	GFP+,NeuN-		%GFP+/TOM+
	L2/3	1st	342	48	294		14.0351					L2/3	1st	77	48	29		62.3377			371	7.81671	12.938	79.2453
		2nd	318	59	259		18.5535						2nd	81	59	22		72.8395			340	6.47059	17.3529	76.1765
		3rd	335	78	257		23.2836						3rd	99	78	21		78.7879			356	5.89888	21.9101	72.191
		SUM	995	185	810	Ave.	18.624						SUM	257	185	72	Ave.	71.3217			Ave.	6.72873	17.4004	75.8709
						SD	4.62465										SD	8.32948
					205	SEM	2.67004									70	SEM	4.80903
					190											68
					189											63
	L5	1st	205	36	169		17.561					L5	1st	70	36	34		51.4286			239	14.2259	15.0628	70.7113
		2nd	190	45	145		23.6842						2nd	68	45	23		66.1765			213	10.7981	21.1268	68.0751
		3rd	189	48	141		25.3968						3rd	63	48	15		76.1905			204	7.35294	23.5294	69.1176
		SUM	584	129	455	Ave.	22.214						SUM	201	129	72	Ave.	64.5985			Ave.	10.7923	19.9063	69.3014
						SD	4.11962										SD	12.4561
					322	SEM	1.59295									51	SEM	6.28681
					241											50
					224											32
	L6	1st	322	29	293		9.00621					L6	1st	51	29	22		56.8627			344	6.39535	8.43023	85.1744
		2nd	241	30	211		12.4481						2nd	50	30	20		60			261	7.66284	11.4943	80.8429
		3rd	224	19	205		8.48214						3rd	32	19	13		59.375			237	5.48523	8.01688	86.4979
		SUM	787	78	709	Ave.	9.97883						SUM	133	78	55	Ave.	58.7459			Ave.	6.51447	9.31379	84.1717
						SD	2.15447										SD	1.66054
						SEM	2.00277										SEM	0.627044

## Sheet: 246R
P15	Ctx M1		NeuN+	NeuN+,GFP+	NeuN+,GFP-		%GFP+/NeuN+					Ctx M1		GFP+	GFP+,NeuN+	GFP+,NeuN-		%NeuN+/GFP+			Total cell Num	% GFP+	%GFP+,NeuN+	NeuN+
line233	L2/3	1st	269	59	210		21.9331					L2/3	1st	74	59	15		79.7297			284	5.28169	20.7746	73.9437
246R		2nd	305	61	244		20						2nd	82	61	21		74.3902			326	6.44172	18.7117	74.8466
		3rd	215	73	142		33.9535						3rd	88	73	15		82.9545			230	6.52174	31.7391	61.7391
		SUM	789	193	596	Ave.	25.2955						SUM	244	193	51	Ave.	79.0248			Ave.	6.08172	23.7418	70.1765
						SD	7.56006										SD	4.32544
						SEM	4.3648										SEM	2.4973
	L5	1st	157	44	113		28.0255					L5	1st	62	44	18		70.9677			175	10.2857	25.1429	64.5714
		2nd	185	55	130		29.7297						2nd	70	55	15		78.5714			200	7.5	27.5	65
		3rd	184	44	140		23.913						3rd	57	44	13		77.193			197	6.59898	22.335	71.066
		SUM	526	143	383	Ave.	27.2228						SUM	189	143	46	Ave.	75.5774			Ave.	8.12823	24.9926	66.8791
						SD	2.99027										SD	4.05113
						SEM	2.91756										SEM	1.49859
	L6	1st	211	34	177		16.1137					L6	1st	51	34	17		66.6667			228	7.45614	14.9123	77.6316
		2nd	265	45	220		16.9811						2nd	64	45	19		70.3125			284	6.69014	15.8451	77.4648
		3rd	238	34	204		14.2857						3rd	44	34	10		77.2727			248	4.03226	13.7097	82.2581
		SUM	714	113	601	Ave.	15.7935						SUM	159	113	46	Ave.	71.4173			Ave.	6.05951	14.8223	79.1181
						SD	1.37594										SD	5.38865
						SEM	1.35088										SEM	3.74057
					308											88
					281											106
					262											91
	Ctx S1		NeuN+	NeuN+,GFP+	NeuN+,GFP-		%TOM+/GFP+					Ctx S1		GFP+	GFP+,NeuN+	GFP+,NeuN-		%GFP+/TOM+
	L2/3	1st	308	66	242		21.4286					L2/3	1st	88	66	22		75			330	6.66667	20	73.3333
		2nd	281	81	200		28.8256						2nd	106	81	25		76.4151			306	8.16993	26.4706	65.3595
		3rd	262	74	188		28.2443						3rd	91	74	17		81.3187			279	6.09319	26.5233	67.3835
		SUM	851	221	630	Ave.	26.1662						SUM	285	221	64	Ave.	77.5779			Ave.	6.9766	24.3313	68.6921
						SD	4.11315										SD	3.31596
					159	SEM	2.37473									54	SEM	1.91447
					191											62
					175											78
	L5	1st	159	32	127		20.1258					L5	1st	54	32	22		59.2593			181	12.1547	17.6796	70.1657
		2nd	191	43	148		22.5131						2nd	62	43	19		69.3548			210	9.04762	20.4762	70.4762
		3rd	175	52	123		29.7143						3rd	78	52	26		66.6667			201	12.9353	25.8706	61.194
		SUM	525	127	398	Ave.	24.1177						SUM	194	127	67	Ave.	65.0936			Ave.	11.3792	21.3421	67.2787
						SD	4.99159										SD	5.22839
					239	SEM	3.78051									45	SEM	2.1548
					294											45
					266											42
	L6	1st	239	28	211		11.7155					L6	1st	45	28	17		62.2222			256	6.64062	10.9375	82.4219
		2nd	294	33	261		11.2245						2nd	45	33	12		73.3333			306	3.92157	10.7843	85.2941
		3rd	266	27	239		10.1504						3rd	42	27	15		64.2857			281	5.33808	9.60854	85.0534
		SUM	799	88	711	Ave.	11.0301						SUM	132	88	44	Ave.	66.6138			Ave.	5.30009	10.4435	84.2565
						SD	0.800453										SD	5.91008
						SEM	0.572341										SEM	4.69808

## Sheet: Total
P15	Ctx M1		Total cell Num	% GFP+	%GFP+,NeuN+	NeuN+				Ctx M1	Total cell Num	% GFP+	%GFP+,NeuN+	NeuN+				Ctx M1	Total cell Num	% GFP+	%GFP+,NeuN+	NeuN+			Ctx M1			% GFP+	%GFP+,NeuN+	NeuN+	Total cell Num
line233	L2/3	1st	247	7.69231	25.9109	66.3968				line233	331	5.43807	24.4713	70.0906				line233	284	5.28169	20.7746	73.9437			L2	4R1		7.75796	23.9593	69.4322	773
4R1		2nd	265	8.30189	25.6604	66.0377				6R	343	7.58017	21.5743	70.8455				246R	326	6.44172	18.7117	74.8466				6R		6.583	22.293	71.124	986
		3rd	261	7.27969	20.3065	75.8621					312	6.73077	20.8333	72.4359					230	6.52174	31.7391	61.7391				246R		6.08172	23.7418	70.1765	840
			Ave.	7.75796	23.9593	69.4322					Ave.	6.583	22.293	71.124					Ave.	6.08172	23.7418	70.1765					Ave.	6.80756	23.3314	70.2442	2599	100.383
			SD	0.51425	3.16586	5.57133					SD	1.07867	1.92251	1.19718					SD	0.693997	7.00227	7.32089					SD	0.86039	0.905802	0.84794
			SEM	0.296902	1.82781	3.21661					SEM	0.622772	1.10996	0.691194					SEM	0.400679	4.04276	4.22672					SEM	0.496746	0.522965	0.489558
		Cell Num	773							Cell Num	986							Cell Num	840						L5	4R1		7.59111	26.5019	65.907	501
																										6R		9.45193	19.8444	70.2333	661
	L5	1st	128	8.59375	32.0312	59.375					243	7.81893	20.9877	71.1934					175	10.2857	25.1429	64.5714				246R		8.12823	24.9926	66.8791	572
		2nd	179	10.0559	20.6704	69.2737					196	6.12245	21.4286	71.9388					200	7.5	27.5	65					Ave.	8.39042	23.7797	67.6731	1734	99.8432
		3rd	194	4.12371	26.8041	69.0722					222	14.4144	17.1171	67.5676					197	6.59898	22.335	71.066					SD	0.957718	3.49055	2.2698
			Ave.	7.59111	26.5019	65.907					Ave.	9.45193	19.8444	70.2333					Ave.	8.12823	24.9926	66.8791					SEM	0.552938	2.01527	1.31047
			SD	3.09056	5.68646	5.65775					SD	4.38055	2.3722	2.33844					SD	1.92198	2.58576	3.63225			L6	4R1		6.67382	19.3129	74.0132	745
			SEM	1.78434	3.28308	3.2665					SEM	2.52911	1.36959	1.3501					SEM	1.10965	1.49289	2.09708				6R		6.76766	11.5618	81.6706	960
		Cell Num	501							Cell Num	661							Cell Num	572							246R		6.05951	14.8223	79.1181	760
																											Ave.	6.50033	15.2324	78.2673	2465	100
	L6	1st	262	5.72519	17.5573	76.7176					343	5.8309	10.4956	83.6735					228	7.45614	14.9123	77.6316					SD	0.384632	3.89182	3.89893
		2nd	232	9.91379	17.6724	72.4138					292	6.16438	10.9589	82.8767					284	6.69014	15.8451	77.4648					SEM	0.222067	2.24694	2.25105
		3rd	251	4.38247	22.7092	72.9084					325	8.30769	13.2308	78.4615					248	4.03226	13.7097	82.2581
			Ave.	6.67382	19.3129	74.0132					Ave.	6.76766	11.5618	81.6706					Ave.	6.05951	14.8223	79.1181
			SD	2.8851	2.94178	2.35503					SD	1.34409	1.46384	2.80751					SD	1.79694	1.07053	2.72053
			SEM	1.66571	1.69844	1.35968					SEM	0.776011	0.84515	1.62092					SEM	1.03747	0.618073	1.5707
		Cell Num	745							Cell Num	960							Cell Num	760
	Ctx S1									Ctx S1								Ctx S1							Ctx S1			% GFP+	%GFP+,NeuN+	NeuN+	Total cell Num
	L2/3	1st	332	6.3253	21.3855	72.2892					371	7.81671	12.938	79.2453					330	6.66667	20	73.3333			L2	4R1		6.47225	22.0843	71.4435	950
		2nd	292	7.87671	24.3151	67.8082					340	6.47059	17.3529	76.1765					306	8.16993	26.4706	65.3595				6R		6.72873	17.4004	75.8709	1067
		3rd	326	5.21472	20.5521	74.2331					356	5.89888	21.9101	72.191					279	6.09319	26.5233	67.3835				246R		6.9766	24.3313	68.6921	915
			Ave.	6.47225	22.0843	71.4435					Ave.	6.72873	17.4004	75.8709					Ave.	6.9766	24.3313	68.6921					Ave.	6.72586	21.272	72.0022	2932	100
			SD	1.33706	1.97637	3.29488					SD	0.984631	4.48624	3.53705					SD	1.0725	3.7511	4.14487					SD	0.252188	3.53615	3.62187
			SEM	0.771954	1.14106	1.9023					SEM	0.568477	2.59013	2.04212					SEM	0.619209	2.1657	2.39304					SEM	0.145601	2.0416	2.09109
		Cell Num	950							Cell Num	1067							Cell Num	915						L5	4R1		8.54304	26.6682	64.7887	579
																										6R		10.7923	19.9063	69.3014	656
	L5	1st	208	11.0577	26.9231	62.0192					239	14.2259	15.0628	70.7113					181	12.1547	17.6796	70.1657				246R		11.3792	21.3421	67.2787	592
		2nd	196	7.14286	29.0816	63.7755					213	10.7981	21.1268	68.0751					210	9.04762	20.4762	70.4762					Ave.	10.2382	22.6389	67.1229	1827	100
		3rd	175	7.42857	24	68.5714					204	7.35294	23.5294	69.1176					201	12.9353	25.8706	61.194					SD	1.49709	3.5626	2.26034
			Ave.	8.54304	26.6682	64.7887					Ave.	10.7923	19.9063	69.3014					Ave.	11.3792	21.3421	67.2787					SEM	0.864344	2.05687	1.30501
			SD	2.18243	2.55038	3.39157					SD	3.4365	4.36327	1.32766					SD	2.0566	4.16364	5.27173			L6	4R1		5.87102	15.2922	78.8367	650
			SEM	1.26003	1.47246	1.95813					SEM	1.98407	2.51914	0.766523					SEM	1.18738	2.40388	3.04363				6R		6.51447	9.31379	84.1717	842
		Cell Num	579							Cell Num	656							Cell Num	592							246R		5.30009	10.4435	84.2565	843
																											Ave.	5.8952	11.6832	82.4216	2335	100
	L6	1st	221	4.0724	17.6471	78.2805					344	6.39535	8.43023	85.1744					256	6.64062	10.9375	82.4219					SD	0.607551	3.17618	3.10491
		2nd	220	6.36364	18.1818	75.4545					261	7.66284	11.4943	80.8429					306	3.92157	10.7843	85.2941					SEM	0.35077	1.83377	1.79262
		3rd	209	7.17703	10.0478	82.7751					237	5.48523	8.01688	86.4979					281	5.33808	9.60854	85.0534
			Ave.	5.87102	15.2922	78.8367					Ave.	6.51447	9.31379	84.1717					Ave.	5.30009	10.4435	84.2565
			SD	1.60987	4.54964	3.69184					SD	1.09368	1.89961	2.95782					SD	1.35993	0.727099	1.59335
			SEM	0.929461	2.62674	2.13149					SEM	0.631435	1.09674	1.7077					SEM	0.785154	0.419791	0.91992
		Cell Num	650							Cell Num	842							Cell Num	843
		M1	% GFP+	%GFP+,NeuN+	NeuN+					S1	% GFP+	%GFP+,NeuN+	NeuN+
		L2/3	6.80756	23.3314	70.2442					L2/3	6.72586	21.272	72.0022
		L5	8.39042	23.7797	67.6731					L5	10.2382	22.6389	67.1229
		L6	6.50033	15.2324	78.2673					L6	5.8952	11.6832	82.4216
