# Supplementary material for: Scn1a-GFP transgenic mouse revealed Nav1.1 expression in neocortical pyramidal tract projection neurons
Source: eLife. 2023 May 23;12:e87495. doi: 10.7554/eLife.87495 (PMC10205085; doi:10.7554/eLife.87495)
Supplement: Figure 4—figure supplement 1—source data 1. [file elife-87495-fig4-figsupp1-data1.xlsx]

## Sheet: 0731_2L
P15	Ctx M1		AnkG+	Ank+,GFP+	Ank+,GFP-		%GFP+/AnkG+					Ctx M1		GFP+	GFP+,Ank+	GFP+,Ank-		%AnkG+/GFP+
line233	L2/3	1st	196	68	128		34.6939					L2/3	1st	93	68	25		73.1183
0731_2L		2nd	166	46	120		27.7108						2nd	76	46	30		60.5263
		3rd	192	66	126		34.375						3rd	102	66	36		64.7059
		SUM	554	180	374	Ave.	32.2599						SUM	271	180	91	Ave.	66.1168
						SD	3.94283										SD	6.41346
						SEM	2.27639										SEM	3.70281
	L5	1st	155	44	111		28.3871					L5	1st	59	44	15		74.5763
		2nd	141	34	107		24.1135						2nd	55	34	21		61.8182
		3rd	149	45	104		30.2013						3rd	69	45	24		65.2174
		SUM	445	123	322	Ave.	27.5673						SUM	183	123	60	Ave.	67.2039
						SD	3.12563										SD	6.60697
						SEM	3.05312										SEM	2.72359
	L6	1st	245	28	217		11.4286					L6	1st	37	28	9		75.6757
		2nd	276	16	260		5.7971						2nd	26	16	10		61.5385
		3rd	278	21	257		7.55396						3rd	41	21	20		51.2195
		SUM	799	65	734	Ave.	8.25988						SUM	104	65	39	Ave.	62.8112
						SD	2.88134										SD	12.2777
						SEM	1.26821										SEM	6.35699

## Sheet: 0731_1L
P15	Ctx M1		AnkG+	Ank+,GFP+	Ank+,GFP-		%GFP+/AnkG+		Area sise			Ctx M1		GFP+	GFP+,Ank+	GFP+,Ank-		%AnkG+/GFP+
line233	L2/3	1st	217	84	133		38.7097		400um X 200um			L2/3	1st	111	84	27		75.6757
0731_1L		2nd	203	59	144		29.064						2nd	77	59	18		76.6234
		3rd	233	44	189		18.8841						3rd	79	44	35		55.6962
		SUM	653	187	466	Ave.	28.8859						SUM	267	187	80	Ave.	69.3318
						SD	9.91398										SD	11.8182
						SEM	5.72384										SEM	6.82326
	L5	1st	163	43	120		26.3804					L5	1st	77	43	34		55.8442
		2nd	163	51	112		31.2883						2nd	76	51	25		67.1053
		3rd	178	49	129		27.5281						3rd	70	49	21		70
		SUM	504	143	361	Ave.	28.3989						SUM	223	143	80	Ave.	64.3165
						SD	2.56726										SD	7.47864
						SEM	1.96836										SEM	2.84193
	L6	1st	263	29	234		11.0266					L6	1st	37	29	8		78.3784
		2nd	249	34	215		13.6546						2nd	47	34	13		72.3404
		3rd	256	21	235		8.20312						3rd	35	21	14		60
		SUM	768	84	684	Ave.	10.9615						SUM	119	84	35	Ave.	70.2396
						SD	2.72633										SD	9.36757
						SEM	2.72581										SEM	6.60239

## Sheet: 0731_4L
P15	Ctx M1		AnkG+	Ank+,GFP+	Ank+,GFP-		%GFP+/AnkG+		Area sise			Ctx M1		GFP+	GFP+,Ank+	GFP+,Ank-		%AnkG+/GFP+
line233	L2/3	1st	190	51	139		26.8421		400um X 200um			L2/3	1st	79	51	28		64.557
0731_4L		2nd	188	61	127		32.4468						2nd	93	61	32		65.5914
		3rd	202	56	146		27.7228						3rd	87	56	31		64.3678
		SUM	580	168	412	Ave.	29.0039						SUM	259	168	91	Ave.	64.8387
						SD	3.01399										SD	0.658658
						SEM	1.74013										SEM	0.380277
	L5	1st	177	40	137		22.5989					L5	1st	64	40	24		62.5
		2nd	155	38	117		24.5161						2nd	54	38	16		70.3704
		3rd	169	38	131		22.4852						3rd	56	38	18		67.8571
		SUM	501	116	385	Ave.	23.2001						SUM	174	116	58	Ave.	66.9092
						SD	1.14116										SD	4.01991
						SEM	1.03018										SEM	1.78862
	L6	1st	233	14	219		6.00858					L6	1st	27	14	13		51.8519
		2nd	260	17	243		6.53846						2nd	26	17	9		65.3846
		3rd	270	29	241		10.7407						3rd	43	29	14		67.4419
		SUM	763	60	703	Ave.	7.7626						SUM	96	60	36	Ave.	61.5594
						SD	2.59272										SD	8.46971
						SEM	2.16129										SEM	2.98516

## Sheet: Total
P15	Ctx M1		%GFP+/AnkG+			%AnkG+/GFP+			N=
line233	L2/3	0731_2L	32.2599		L2/3	66.1168			554
		0731_1L	28.8859			69.3318			653
		0731_4L	29.0039			64.8387			580
		Ave.	30.0499		Ave.	66.7624		SUM	1787
		SD	1.91482		SD	2.31504
		SEM	1.10552		SEM	1.33659
	L5	0731_2L	27.5673		L5	67.2039			445
		0731_1L	28.3989			64.3165			504
		0731_4L	23.2001			66.9092			501
		Ave.	26.3888		Ave.	66.1432		SUM	1450
		SD	2.79263		SD	1.58884
		SEM	1.61232		SEM	0.917318
	L6	0731_2L	8.25988		L6	62.8112			799
		0731_1L	10.9615			70.2396			768
		0731_4L	7.7626			61.5594			763
		Ave.	8.99464		Ave.	64.8701		SUM	2330
		SD	1.72136		SD	4.69207
		SEM	0.993828		SEM	2.70897
	Supplemetary table S5
			per cells with AnkG+ AIS
		Layer	GFP+	GFP-
		L2/3	30.0499	69.9501
		L5	26.3888	73.6112
		L6	8.99464	91.0054
				Nav1.1/GFP/AnkG	Nav1.2/GFP/AnkG
		Layer	% GFP+/AnkG+ AIS	% GFP+/AnkG+ AIS	% GFP+/AnkG+ AIS	Average	SD	SEM
		L2/3	30.0499	16.6	22.6	23.0833	6.73797	3.89017
		L5	26.3888	21.4	30.2	25.9963	4.41311	2.54791
		L6	8.99464	7.9	20.7	12.5315	7.09523	4.09643
	Supplemetary table S6
			per cells with AnkG+ AIS
		Layer	GFP+	GFP-
		L2/3	23.0833	76.9167
		L5	25.9963	74.0037
		L6	12.5315	87.4685
