# Supplementary material for: Scn1a-GFP transgenic mouse revealed Nav1.1 expression in neocortical pyramidal tract projection neurons
Source: eLife. 2023 May 23;12:e87495. doi: 10.7554/eLife.87495 (PMC10205085; doi:10.7554/eLife.87495)
Supplement: Figure 4—source data 1. [file elife-87495-fig4-data1.xlsx]

## Sheet: 1R1
													1R1
																	GFP+/AnkG/Nav1.1+				Num.				Nav1.1+
														AnkG+	GFP+	GFP+/AnkG+	Soma:AIS+	Soma+	AIS+	GFP-/Ank+/Nav1.1+	GFP+/AnkG+/Nav1.1-	%_Nav1.1/GFP+:AnkG+		Nav1.1	GPF+/Ank+	GPF+/Ank-	GFP-/Ank+		%Nav.1.1/GFP
												L2/3	1st	115	35	17	3	6	0	0	8	52.9412		13	9	4	0		100
													2nd	128	44	35	9	3	0	1	23	34.2857		16	9	6	1		93.75
													3rd	125	33	23	3	4	0	0	16	30.4348		10	7	3	0		100
													計	368		75				平均		39.2206		39				平均	97.9167
												L5	1st	122	39	21	5	6	0	0	10	52.381		14	11	3	0		100
													2nd	125	36	20	3	7	0	1	10	50		18	10	7	1		94.4444
													3rd	145	27	20	7	4	0	0	9	55		11	11	0	0		100
													計	392		61				平均		52.4603		43				平均	98.1481
												L6	1st	184	9	6	1	4	0	1	1	83.3333		7	5	1	1		85.7143
													2nd	173	12	10	3	3	0	0	4	60		7	6	1	0		100
													3rd	219	15	11	1	5	0	0	5	54.5455		8	6	2	0		100
													計	576		27				平均		65.9596		22				平均	95.2381
																	%_Nav1.1+/GFP+/AnkG+			%_GFP-/Ank+/Nav1.1+	%_Nav1.1-/GFP+/AnkG+	%_GFP-/AnkG+
																L2/3	7.82609			0	6.95652	85.2174	100
																	9.375			0.78125	17.9688	71.875	100
																	5.6			0	12.8	81.6	100
																平均	7.60036			0.260417	12.5751	79.5641
																L5	9.01639			0	8.19672	82.7869
																	8			0.8	8	83.2
																	7.58621			0	6.2069	86.2069
																平均	8.20087			0.266667	7.46787	84.0646
																L6	2.71739			0.543478	0.543478	96.1957
																	3.46821			0	2.31214	94.2197
																	2.73973			0	2.28311	94.9772
																平均	2.97511			0.181159	1.71291	95.1308
																		L2/3	8.38161		11.7938	79.8245
																		L5	9.02054		6.6482	84.3313
																		L6	3.16779		1.52023	95.312
														AnkG+	GFP+	GFP+/AnkG+	% GFP+;AnkG+/ANkG
												L2/3	1st	115	35	17	14.7826
													2nd	128	44	35	27.3438
													3rd	125	33	23	18.4
													計	368		75	20.3804
												L5	1st	122	39	21	17.2131
													2nd	125	36	20	16
													3rd	145	27	20	13.7931
													計	392		61	15.5612
												L6	1st	184	9	6	3.26087
													2nd	173	12	10	5.78035
													3rd	219	15	11	5.02283
													計	576		27	4.6875

## Sheet: 4R1
														4R1
																		GFP+/AnkG/Nav1.1+				Num.				Nav1.1+
															AnkG+	GFP+	GFP+/AnkG+	Soma:AIS+	Soma+	AIS+	GFP-/Ank+/Nav1.1+	GFP+/AnkG+/Nav1.1-	%_Nav1.1/GFP+:AnkG+		Nav1.1	GPF+/Ank+	GPF+/Ank-	GFP-/Ank+		%Nav.1.1/GFP
													L2/3	1st	163	43	23	3	1	0	0	19	17.3913		8	4	4	0		100
														2nd	128	31	17	4	2	0	0	11	35.2941		9	6	3	0		100
														3rd	178	36	24	6	1	0	0	17	29.1667		9	7	2	0		100
														計	469		64					平均	27.284		26				平均	100
													L5	1st	105	38	20	7	1	0	0	12	40		13	8	5	0		100
														2nd	85	37	19	6	2	0	0	11	42.1053		11	8	3	0		100
														3rd	101	46	23	3	0	3	0	17	26.087		14	6	7	0		100
														計	291		62					平均	36.0641		38				平均	100
													L6	1st	120	23	11	1	2	0	0	8	27.2727		9	3	6	0		100
														2nd	113	21	16	2	6	0	0	8	50		13	8	5	0		100
														3rd	140	16	11	3	3	0	0	5	54.5455		8	6	2	0		100
														計	373		38					平均	43.9394		30				平均	100
																		%_Nav1.1+/GFP+/AnkG+				%_Nav1.1-/GFP+/AnkG+	%_GFP-/AnkG+
																	L2/3	2.45399			0	11.6564	85.8896
																		4.6875			0	8.59375	86.7188
																		3.93258			0	9.55056	86.5169
																	Ave.	3.69136			0	9.93358	86.3751
																	L5	7.61905			0	11.4286	80.9524
																		9.41176			0	12.9412	77.6471
																		5.94059			0	16.8317	77.2277
																	Ave.	7.65714			0	13.7338	78.6091
																	L6	2.5			0	6.66667	90.8333
																		7.07965			0	7.07965	85.8407
																		4.28571			0	3.57143	92.1429
																	Ave.	4.62179			0	5.77258	89.6056
																			L2/3	8.38161		11.7938	79.8245
																			L5	9.02054		6.6482	84.3313
																			L6	3.16779		1.52023	95.312
															AnkG+	GFP+	GFP+/AnkG+	% GFP+;AnkG+/ANkG
													L2/3	1st	163	43	23	14.1104		85.8896
														2nd	128	31	17	13.2812
														3rd	178	36	24	13.4831
														計	469		64	13.6461
													L5	1st	105	38	20	19.0476
														2nd	85	37	19	22.3529
														3rd	101	46	23	22.7723
														計	291		62	21.3058
													L6	1st	120	23	11	9.16667
														2nd	113	21	16	14.1593
														3rd	140	16	11	7.85714
														計	373		38	10.1877

## Sheet: 6R
														6R
																		GFP+/AnkG/Nav1.1+				Num.				Nav1.1+
															AnkG+	GFP+	GFP+/AnkG+	Soma:AIS+	Soma+	AIS+	GFP-/Ank+/Nav1.1+	GFP+/AnkG+/Nav1.1-	%_Nav1.1/GFP+:AnkG+		Nav1.1	GPF+/Ank+	GPF+/Ank-	GFP-/Ank+		%Nav.1.1/GFP
													L2/3	1st	209	53	27	2	2	2	0	21	22.2222		15	6	9	0		100
														2nd	178	53	32	7	4	0	1	21	34.375		13	11	1	1		92.3077
														3rd	188	55	32	7	4	1	0	20	37.5		15	12	3	0		100
														計	575		91					平均	31.3657		43				平均	97.4359
													L5	1st	119	60	35	3	7	0	1	25	28.5714		17	10	6	1		94.1176
														2nd	117	47	33	4	5	0	0	24	27.2727		14	9	5	0		100
														3rd	135	46	32	6	2	3	0	21	34.375		12	8	4	0		100
														計	371		100					平均	30.0731		43				平均	98.0392
													L6	1st	169	23	15	2	3	0	1	10	33.3333		9	5	3	1		88.8889
														2nd	185	20	11	2	1	0	0	8	27.2727		8	3	5	0		100
														3rd	178	26	20	3	8	0	0	9	55		13	11	2	0		100
														計	532		46					平均	38.5354		30				平均	96.2963
																		%_Nav1.1+/GFP+/AnkG+				%_Nav1.1-/GFP+/AnkG+	%_GFP-/AnkG+
																	L2/3	2.87081			0	10.0478	87.0813
																		6.17978			0.561798	11.7978	81.4607
																		6.38298			0	10.6383	82.9787
																	Ave.	5.14452			0.187266	10.828	83.8402
																	L5	8.40336			0.840336	21.0084	69.7479
																		7.69231			0	20.5128	71.7949
																		8.14815			0	15.5556	76.2963
																	Ave.	8.08127			0.280112	19.0256	72.613
																	L6	2.95858			0.591716	5.91716	90.5325
																		1.62162			0	4.32432	94.0541
																		6.17978			0	5.05618	88.764
																	Ave.	3.58666			0.197239	5.09922	91.1169
																			L2/3	8.38161		11.7938	79.8245
																			L5	9.02054		6.6482	84.3313
																			L6	3.16779		1.52023	95.312
															AnkG+	GFP+	GFP+/AnkG+	% GFP+;AnkG+/ANkG
													L2/3	1st	209	53	27	12.9187
														2nd	178	53	32	17.9775
														3rd	188	55	31	16.4894
														計	575		90	15.6522
													L5	1st	119	60	35	29.4118
														2nd	117	47	33	28.2051
														3rd	135	46	29	21.4815
														計	371		97	26.1456
													L6	1st	169	23	15	8.87574
														2nd	185	20	11	5.94595
														3rd	178	26	20	11.236
														計	532		46	8.64662

## Sheet: Cortex
1R1	%_Nav1.1+/GFP+/AnkG+		%_Nav1.1+/GFP-/Ank+	%_Nav1.1-/GFP+/AnkG+	%_Nav1.1-/GFP-/Ank+
L2/3	7.82609		0	6.95652	85.2174
	9.375		0.78125	17.9688	71.875
	5.6		0	12.8	81.6		L2/3		%_Nav1.1+/GFP+/AnkG+	%_Nav1.1-/GFP+/AnkG+	%_Nav1.1+/GFP-/Ank+	%_Nav1.1-/GFP-/Ank+				%_Nav1.1/GFP+:AnkG+			L2/3	%Nav.1.1/GFP
Ave.	7.60036		0.260417	12.5751	79.5641			1R1	7.60036	12.5751	0.260417	79.5641			1R1	L2/3	39.2206		1R1	97.9167
L5	9.01639		0	8.19672	82.7869			4R1	3.69136	9.93358	0	86.3751			4R1		27.284		4R1	100
	8		0.8	8	83.2			6R	5.14452	10.828	0.187266	84.0176			6R		31.769		6R	97.4359
	7.58621		0	6.2069	86.2069			Ave.	5.47875	11.1122	0.149228	83.3189				Ave.	32.7579		Ave.	98.4509
Ave.	8.20087		0.266667	7.46787	84.0646			SD	1.97582	1.3435	0.134311	3.45879				SD	6.02939		SD	1.36296
L6	2.71739		0.543478	0.543478	96.1957		N=3	SEM	1.14074	0.775669	0.0775444	1.99694			N=3	SEM	3.48107	N=3	SEM	0.786908
	3.46821		0	2.31214	94.2197
	2.73973		0	2.28311	94.9772
Ave.	2.97511		0.181159	1.71291	95.1308		L5												L5
								1R1	8.20087	7.46787	0.266667	84.0646			1R1	L5	52.4603		1R1	98.1481
								4R1	7.65714	13.7338	0	78.6091			4R1		36.0641		4R1	100
								6R	8.08127	19.0256	0.280112	73.3538			6R		31.2584		6R	98.0392
								Ave.	7.97976	13.4091	0.18226	78.6758				Ave.	39.9276		Ave.	98.7291
								SD	0.285727	5.7857	0.157985	5.35573				SD	11.1165		SD	1.10196
4R1	%_Nav1.1+/GFP+/AnkG+		%_Nav1.1+/GFP-/Ank+	%_Nav1.1-/GFP+/AnkG+	%_GFP-/AnkG+		N=3	SEM	0.164964	3.34037	0.0912124	3.09213			N=3	SEM	6.41809	N=3	SEM	0.636217
L2/3	2.45399		0	11.6564	85.8896
	4.6875		0	8.59375	86.7188		L6												L6
	3.93258		0	9.55056	86.5169			1R1	2.97511	1.71291	0.181159	95.1308			1R1	L6	65.9596		1R1	95.2381
Ave.	3.69136		0	9.93358	86.3751			4R1	4.62179	5.77258	0	89.6056			4R1		43.9394		4R1	100
L5	7.61905		0	11.4286	80.9524			6R	3.58666	5.09922	0.197239	91.1169			6R		38.5354		6R	96.2963
	9.41176		0	12.9412	77.6471			Ave.	3.72785	4.1949	0.126133	91.9511				Ave.	49.4781		Ave.	97.1781
	5.94059		0	16.8317	77.2277			SD	0.832369	2.17568	0.10953	2.8555				SD	14.5269		SD	2.50043
Ave.	7.65714		0	13.7338	78.6091		N=3	SEM	0.480569	1.25613	0.0632369	1.64863			N=3	SEM	8.3871	N=3	SEM	1.44362
L6	2.5		0	6.66667	90.8333
	7.07965		0	7.07965	85.8407		Figure 4D-left							Figure 4D-midle				Figure 4D-right
	4.28571		0	3.57143	92.1429											%_Nav1.1+/GFP+:AnkG+	%_Nav1.1-/GFP+:AnkG+	L2/3	%_GFP+/Nav1.1+	%_GFP-/Nav1.1+
Ave.	4.62179		0	5.77258	89.6056			L2/3	5.47875	11.1122	0.149228	83.3189			L2/3	32.7579	67.2421	L5	98.4509	1.54915
								L5	7.97976	13.4091	0.18226	78.6758			L5	39.9276	60.0724	L6	98.7291	1.27088
								L6	3.72785	4.1949	0.126133	91.9511			L6	49.4781	50.5219		97.1781	2.82187
6R	%_Nav1.1+/GFP+/AnkG+		%_Nav1.1+/GFP-/Ank+	%_Nav1.1-/GFP+/AnkG+	%_GFP-/AnkG+
L2/3	2.87081		0	10.0478	87.0813
	6.17978		0.561798	11.7978	81.4607
	6.38298		0	10.6383	82.9787
Ave.	5.14452		0.187266	10.828	83.8402
L5	8.40336		0.840336	21.0084	69.7479
	7.69231		0	20.5128	71.7949
	8.14815		0	15.5556	76.2963
Ave.	8.08127		0.280112	19.0256	72.613
L6	2.95858		0.591716	5.91716	90.5325
	1.62162		0	4.32432	94.0541
	6.17978		0	5.05618	88.764
Ave.	3.58666		0.197239	5.09922	91.1169
			Cell Num.
			AnkG+
L2/3	1R1		368
	4R1		469
	6R		575
			1412
L5	1R1		392
	4R1		291
	6R		371
			1054
L6	1R1		576
	4R1		373
	6R		532
			1481
			Cell Num.
			AnkG+,GFP+		SD	SEM		AnkG+,GFP-	SD	SEM
L2/3	1R1		75	20.3804	3.45767	1.99629		79.6196	3.45767	1.99629
	4R1		64	13.6461				86.3539
	6R		90	15.6522				84.3478
			229	16.2181				83.7819
L5	1R1		61	15.5612	5.29861	3.05915		84.4388	5.29861	3.05915
	4R1		62	21.3058				78.6942
	6R		97	26.1456				73.8544
			220	20.8729				79.1271
L6	1R1		27	4.6875	2.83729	1.63811		95.3125	2.83729	1.63811
	4R1		38	10.1877				89.8123
	6R		46	8.64662				91.3534
			111	7.49494				92.5051
			Nav1.1+,AnkG		SD	SEM			SD	SEM
L2/3	1R1		39	10.5978	2.55011	1.4723		89.4022	2.55011	1.4723
	4R1		26	5.54371				94.4563
	6R		43	7.47826				92.5217
			108	7.64873				92.3513
L5	1R1		43	10.9694	1.07277	0.619362		89.0306	1.07277	0.619362
	4R1		38	13.0584				86.9416
	6R		43	11.5903				88.4097
			124	11.7647				88.2353
L6	1R1		22	3.81944	2.11845	1.22309		96.1806	2.11845	1.22309
	4R1		30	8.0429				91.9571
	6R		30	5.6391				94.3609
			82	5.5368				94.4632
