# Supplementary material for: Scn1a-GFP transgenic mouse revealed Nav1.1 expression in neocortical pyramidal tract projection neurons
Source: eLife. 2023 May 23;12:e87495. doi: 10.7554/eLife.87495 (PMC10205085; doi:10.7554/eLife.87495)
Supplement: Figure 5—source data 1. [file elife-87495-fig5-data1.xlsx]

## Sheet: Hippocampus
Hippocampus											% Nav.1.1+/GFP+
1R1		Nav1.1+	Nav1.1-	Nav1.1+ only		% Nav.1.1/GFP	Nav1.1+GFP-				1R1	4R1	6R
1st	GPF+/Ank+	13	0			100	0			1st	100	92	-
	GPF+/Ank-	7	0			100	0			2nd	100	100	100
				20						3rd	92.8571	100	100	N=3	SD	SEM
										Ave.	97.619	97.3333	100	98.3175	1.46411	0.845303
2nd	GPF+/Ank+	16	0			100	0							1.68254
	GPF+/Ank-	18	2			90	0
				34							% GFP+/Nav1.1+
										1st	100	100
3rd	GPF+/Ank+	13	1			92.8571	0			2nd	100	100	100
	GPF+/Ank-	13	0			100	0			3rd	100	100	100	N=3	SD	SEM
				26						Ave.	100	100	100	100	0	0
	Sum	42	1											0
											Supplementary table S7		% Nav.1.1/GFP+	98.3175
											Supplementary able S8		% GFP+/Nav1.1+	100
4R1		Nav1.1+	Nav1.1-			% Nav.1.1/GFP
1st	GPF+/Ank+	23	2			92	0
	GPF+/Ank-	4	4			50	0
				27
2nd	GPF+/Ank+	18	0			100	0
	GPF+/Ank-	1	3			25	0
				19
3rd	GPF+/Ank+	15	0			100	0
	GPF+/Ank-	1	5			16.6667	0
				16
	Sum	56	2
6R		Nav1.1+	Nav1.1-			% Nav.1.1/GFP
1st	GPF+/Ank+	3	0			100	0
	GPF+/Ank-	15	1			93.75	0
				17
2nd	GPF+/Ank+	7	0			100	0
	GPF+/Ank-	9	4			69.2308	0
				16
3rd	GPF+/Ank+	6	0			100	0
	GPF+/Ank-	6	3			66.6667	0
				12
	Sum	16	0
		114	3
