# Supplementary material for: Scn1a-GFP transgenic mouse revealed Nav1.1 expression in neocortical pyramidal tract projection neurons
Source: eLife. 2023 May 23;12:e87495. doi: 10.7554/eLife.87495 (PMC10205085; doi:10.7554/eLife.87495)
Supplement: Figure 7—source data 1. [file elife-87495-fig7-data1.xlsx]

## Sheet: M691
4w	Ctx		GFP+	GFP+,Tom+	GFP+,Tom-		%TOM+/GFP+					Ctx		Tom+	Tom+,GFP+	Tom+,GFP-		%GFP+/TOM+
line233	L2/3	1st	121	39	82		32.2314					L2/3	1st	47	39	8		82.9787
1aGFP;Vgat-Cre;RosaTomato		2nd	115	35	80		30.4348						2nd	41	35	6		85.3659
		3rd	170	24	146		14.1176						3rd	37	24	13		64.8649
		SUM	406	98	308	Ave.	25.5946						SUM	125	98	27	Ave.	77.7365
						SD	9.97985										SD	11.2109
						SEM	5.76187										SEM	6.4726
	L5	1st	94	29	65		30.8511					L5	1st	43	29	14		67.4419
		2nd	98	30	68		30.6122						2nd	40	36	10		90
		3rd	107	22	85		20.5607						3rd	30	22	8		73.3333
		SUM	299	81	218	Ave.	27.3414						SUM	113	87	32	Ave.	76.9251
						SD	5.87339										SD	11.7001
						SEM	5.12686										SEM	8.77147
	L6	1st	78	25	53		32.0513					L6	1st	26	25	1		96.1538
		2nd	76	23	53		30.2632						2nd	26	23	3		88.4615
		3rd	70	21	49		30						3rd	26	21	5		80.7692
		SUM	224	69	155	Ave.	30.7715						SUM	78	69	9	Ave.	88.4615
						SD	1.11612										SD	7.69231
						SEM	0.392179										SEM	4.44116
4w
line233
1aGFP;Vgat-Cre;RosaTomato		%TOM+/GFP+	Cell Num.		%GFP+/TOM+	Cell Num.
M691	L2/3	25.5946	406		77.7365	125
	L5	27.3414	299		76.9251	113
	L6	30.7715	224		88.4615	78
4w	Hippocampus		GFP+	GFP+,Tom+	GFP+,Tom-		%TOM+/GFP+					Hippocampus		Tom+	Tom+,GFP+	Tom+,GFP-		%GFP+/TOM+
line233	CA1	1st	32	32	0		100					CA1	1st	36	32	4		88.8889
1aGFP;Vgat-Cre;RosaTomato		2nd	29	27	2		93.1034						2nd	29	27	2		93.1034
		3rd	52	52	0		100						3rd	53	52	1		98.1132
		SUM	113	111	2	Ave.	97.7011						SUM	118	111	7	Ave.	93.3685
						SD	3.98173										SD	4.61787
						SEM	2.29885										SEM	2.66613
	CA2/3	1st	46	45	1		97.8261					CA2/3	1st	70	45	25		64.2857
		2nd	41	38	3		92.6829						2nd	44	38	6		86.3636
		3rd	40	40	0		100						3rd	48	40	8		83.3333
		SUM	127	123	4	Ave.	96.8363						SUM	162	123	39	Ave.	77.9942
						SD	3.7576										SD	11.9682
						SEM	3.66968										SEM	4.23745
	DG	1st	48	46	2		95.8333					DG	1st	62	46	16		74.1935
		2nd	58	57	1		98.2759						2nd	65	57	8		87.6923
		3rd	58	58	0		100						3rd	68	58	10		85.2941
		SUM	164	161	3	Ave.	98.0364						SUM	195	161	34	Ave.	82.3933
						SD	2.09363										SD	7.20174
						SEM	1.07127										SEM	2.65346
4w
line233
1aGFP;Vgat-Cre;RosaTomato		%TOM+/GFP+	Cell Num.		%GFP+/TOM+	Cell Num.
M691	CA1	97.7011	113		93.3685	118
	CA2/3	96.8363	127		77.9942	162
	DG	98.0364	164		82.3933	195

## Sheet: M700
4w	Ctx		GFP+	GFP+,Tom+	GFP+,Tom-		%TOM+/GFP+					Ctx		Tom+	Tom+,GFP+	Tom+,GFP-		%GFP+/TOM+
line233	L2/3	1st	153	24	129		15.6863					L2/3	1st	40	24	16		60
1aGFP;Vgat-Cre;RosaTomato		2nd	153	36	117		23.5294						2nd	54	36	18		66.6667
		3rd	170	39	131		22.9412						3rd	51	39	12		76.4706
		SUM	476	99	377	Ave.	20.719						SUM	145	99	46	Ave.	67.7124
						SD	4.36834										SD	8.28494
						SEM	2.52206										SEM	4.78331
	L5	1st	128	37	91		28.9062					L5	1st	47	37	10		78.7234
		2nd	134	43	91		32.0896						2nd	54	43	11		79.6296
		3rd	132	34	98		25.7576						3rd	47	34	13		72.3404
		SUM	394	114	280	Ave.	28.9178						SUM	148	114	34	Ave.	76.8978
						SD	3.166										SD	3.97274
						SEM	3.16599										SEM	3.68251
	L6	1st	88	20	68		22.7273					L6	1st	23	20	3		86.9565
		2nd	173	33	140		19.0751						2nd	49	33	16		67.3469
		3rd	105	32	73		30.4762						3rd	41	32	9		78.0488
		SUM	366	85	281	Ave.	24.0929						SUM	113	85	28	Ave.	77.4507
						SD	5.82191										SD	9.81846
						SEM	5.71414										SEM	6.01351
4w
line233
1aGFP;Vgat-Cre;RosaTomato		%TOM+/GFP+	Cell Num.		%GFP+/TOM+	Cell Num.
M700	L2/3	20.719	476		67.7124	145
	L5	28.9178	394		76.8978	148
	L6	24.0929	366		77.4507	113
4w	Hippocampus		GFP+	GFP+,Tom+	GFP+,Tom-		%TOM+/GFP+					Hippocampus		Tom+	Tom+,GFP+	Tom+,GFP-		%GFP+/TOM+
line233	CA1	1st	49	48	1		97.9592					CA1	1st	51	48	3		94.1176
1aGFP;Vgat-Cre;RosaTomato		2nd	50	49	1		98						2nd	53	49	4		92.4528
		3rd	51	50	1		98.0392						3rd	54	50	4		92.5926
		SUM	150	147	3	Ave.	97.9995						SUM	158	147	11	Ave.	93.0544
						SD	0.0400187										SD	0.923484
						SEM	0.0231048										SEM	0.533174
	CA2/3	1st	29	29	0		100					CA2/3	1st	36	29	7		80.5556
		2nd	32	32	0		100						2nd	46	32	14		69.5652
		3rd	36	33	3		91.6667						3rd	40	33	7		82.5
		SUM	97	94	3	Ave.	97.2222						SUM	122	94	28	Ave.	77.5403
						SD	4.81125										SD	6.97468
						SEM	4.24313										SEM	6.5257
	DG	1st	46	40	6		86.9565					DG	1st	53	40	13		75.4717
		2nd	43	38	5		88.3721						2nd	51	38	13		74.5098
		3rd	47	43	4		91.4894						3rd	65	43	22		66.1538
		SUM	136	121	15	Ave.	88.9393						SUM	169	121	48	Ave.	72.0451
						SD	2.31905										SD	5.12461
						SEM	1.66041										SEM	4.29348
4w
line233
1aGFP;Vgat-Cre;RosaTomato		%TOM+/GFP+	Cell Num.		%GFP+/TOM+	Cell Num.
M700	CA1	97.9995	150		93.0544	158
	CA2/3	97.2222	97		77.5403	122
	DG	88.9393	136		72.0451	169

## Sheet: Total
4w	Cortex							Figure 7-left
line233	%TOM+/GFP+								%TOM+/GFP+
1aGFP;Vgat-Cre;RosaTomato		M691	M700	Ave	SD	SEM			TOM+	TOM-
N=2	L2/3	25.5946	20.719	23.1568	3.44761	2.43783		L2/3	23.1568	76.8432
	L5	27.3414	28.9178	28.1296	1.11471	0.78822		L5	28.1296	71.8704
	L6	30.7715	24.0929	27.4322	4.72249	3.33931		L6	27.4322	72.5678
		Cell Num.	Cell Num.	SUM
	L2/3	406	476	882
	L5	299	394	693
	L6	224	366	590				Figure 7-right
	%GFP+/TOM+								%GFP+/TOM+
		M691	M700	Ave	SD	SEM			GFP+	GFP-
	L2/3	77.7365	67.7124	72.7244	7.08808	5.01203		L2/3	72.7244	27.2756
	L5	76.9251	76.8978	76.9114	0.019265	0.0136224		L5	76.9114	23.0886
	L6	88.4615	77.4507	82.9561	7.78581	5.5054		L6	82.9561	17.0439
		Cell Num.	Cell Num.	SUM
	L2/3	125	145	270
	L5	113	148	261
	L6	78	113	191
4w	Hippocampus
line233	%TOM+/GFP+
1aGFP;Vgat-Cre;RosaTomato		M691	M700	Ave	SD	SEM
N=2	CA1	97.7011	98	97.8506	0.211319	0.149425
	DG	98.0364	88.94	93.4882	6.43213	4.5482
		Cell Num.	Cell Num.	SUM
	CA1	113	150	263
	DG	164	136	300
	%GFP+/TOM+
		M691	M700	Ave	SD	SEM
	CA1	93.3685	93.05	93.2093	0.225224	0.159257
	DG	82.3933	72.05	77.2217	7.31383	5.17166
		Cell Num.	Cell Num.	SUM
	CA1	118	158	276
	DG	195	169	364
									%TOM+/GFP+
									TOM+	TOM-
								CA1	97.8506	2.14943
								DG	93.4882	6.5118
									%GFP+/TOM+
									GFP+	GFP-
								CA1	93.2093	6.79074
								DG	77.2217	22.7783
