# Supplementary material for: Scn1a-GFP transgenic mouse revealed Nav1.1 expression in neocortical pyramidal tract projection neurons
Source: eLife. 2023 May 23;12:e87495. doi: 10.7554/eLife.87495 (PMC10205085; doi:10.7554/eLife.87495)
Supplement: Figure 8—source data 1. [file elife-87495-fig8-data1.xlsx]

## Sheet: 6R_GFP_PV_SST
4w	Ctx		GFP+	GFP+,PV+	GFP+,PV-	GFP+,SST+	GFP-,SST+	GFP+.PV+,SST+		%PV+, SST+/GFP	% PV+/GFP+	% SST+/GFP+	SUM of %PV+,SST+/GFP		% GFP+/PV+	% GFP+/SST+		% GFP+/PV+,SST+
6R	L2/3	1st	58	6	0	4	0	0		0	10.3448	6.89655	17.2414		100	100		100
		2nd	64	11	0	1	0	0		0	17.1875	1.5625	18.75		100	100		100
		3rd	62	7	0	3	0	0		0	11.2903	4.83871	16.129		100	100		100
		SUM	184	24	0	8	0	0	Ave.	0	12.9409	4.43259	17.3735		100	100		100
									SD	0	3.70794	2.69012	1.31547
									SEM	0	3.04233	1.78587	1.31104
	L5	1st	52	12	0	5	2	0		0	23.0769	9.61538	32.6923		100	71.4286		89.4737
		2nd	45	13	0	2	0	0		0	28.8889	4.44444	33.3333		100	100		100
		3rd	52	11	0	7	1	0		0	21.1538	13.4615	34.6154		100	87.5		94.7368
		SUM	149	36	0	14	3	0	Ave.	0	24.3732	9.17379	33.547		100	86.3095		94.7368
									SD	0
									SEM	0
	L6	1st	33	11	0	5	1	0		0	33.3333	15.1515	48.4848		100	83.3333		94.1176
		2nd	42	9	0	2	0	0		0	21.4286	4.7619	26.1905		100	100		100
		3rd	21	5	0	7	1	0		0	23.8095	33.3333	57.1429		100	87.5		92.3077
		SUM	96	25	0	14	2	0	Ave.	0	26.1905	17.7489	43.9394		100	90.2778		95.4751
									SD	0	6.29941	14.4617	15.969
									SEM	0	2.38095	14.3054	15.5317
	Hippo		GFP+	GFP+,PV+	GFP+,PV-	GFP+,SST+	GFP-,SST+	GFP+.PV+,PPT+		%PV+, SST+/GFP	% PV+/GFP+	% SST+/GFP+	SUM of %PV+,SST+/GFP		% GFP+/PV+	% GFP+/SST+
	CA1	1st	14	4	0	2	0	0		0	28.5714	14.2857	42.8571		100	100		100
		2nd	22	7	0	4	0	0		0	31.8182	18.1818	50		100	100		100
		3rd	26	6	0	4	0	0		0	23.0769	15.3846	38.4615		100	100		100
		SUM	62	17	0	10	0	0	Ave.	0	27.8222	15.9507	43.7729		100	100		100
									SD	0	4.41853	2.0088	5.82348
									SEM	0	4.37598	1.47889	5.77528
	CA23	1st	32	9	0	6	0	0		0	28.125	18.75	46.875		100	100		100
		2nd	26	10	0	4	1	0		0	38.4615	15.3846	53.8462		100	80		93.3333
		3rd	31	9	0	5	0	1		3.22581	29.0323	16.129	48.3871		100	100		100
		SUM	89	28	0	15	1	1	Ave.	1.07527	31.8729	16.7545	49.7028		100	93.3333		97.7778
									SD	1.86242	5.7239	1.76774	3.66708
									SEM	1.6425	4.83719	0.685826	2.84898
	DG	1st	25	3	0	4	0	0		0	12	16	28		100	100		100
		2nd	20	1	0	7	0	0		0	5	35	40		100	100		100
		3rd	23	4	0	5	0	0		0	17.3913	21.7391	39.1304		100	100		100
		SUM	68	8	0	16	0	0	Ave.	0	11.4638	24.2464	35.7101		100	100		100
									SD	0	6.21303	9.74498	6.69132
									SEM	0	6.19759	7.04483	2.2678
	Total	1st	71	16	0	12	0	0		0	22.5352	16.9014	39.4366		100	100		100
	CA1-3&DG	2nd	68	18	0	15	1	0		0	26.4706	22.0588	48.5294		100	93.75		97.0588
		3rd	80	19	0	14	0	1		1.25	23.75	17.5	42.5		100	100		100
		SUM	219	53	0	41	1	1	Ave.	0.416667	24.2519	18.8201	43.4887		100	97.9167		99.0196
									SD	0.721688	2.01513	2.82076	4.62632
									SEM	0.636469	1.44776	2.34574	3.23368
			% PV+, SST+	% PV+	% SST+	% PV-, SST-									% GFP+/PV+	% GFP-/PV+		% GFP+/SST+	% GFP-/SST+
		L2/3	0	12.9409	4.43259	82.6265								L2/3	100	0		100	0
		L5	0	24.3732	9.17379	66.453								L5	100	0		86.3095	13.6905
		L6	0	26.1905	17.7489	56.0606								L6	100	0		90.2778	9.72222
		CA1	0	27.8222	15.9507	56.2271								CA1	100	0		100	0
		CA2/3	1.07527	31.8729	16.7545	50.2972								CA2/3	100	0		93.3333	6.66667
		DG	0	11.4638	24.2464	64.2899								DG	100	0		97.9167	2.08333
			GFP+	GFP+,PV+	GFP+,PV-	GFP+,SST+	GFP-,SST+	GFP+.PV+,SST+
	L2/3	SUM	184	24	0	8	0	0
	L5	SUM	149	36	0	14	3	0
	L6	SUM	96	25	0	14	2	0
	CA1	SUM	62	17	0	10	0	0
	CA2/3	SUM	89	28	0	15	1	1
	DG	SUM	68	8	0	16	0	0

## Sheet: 3R_GFP_PV_SST
4w	Ctx		GFP+	GFP+,PV+	GFP+,PV-	GFP+,SST+	GFP-,SST+	GFP+.PV+,SST+		%PV+, SST+/GFP	% PV+/GFP+	% SST+/GFP+	SUM of %PV+,SST+/GFP		% GFP+/PV+	% GFP+/SST+		% GFP+/PV+,SST+
3R	L2/3	1st	76	16	0	5	0	0		0	21.0526	6.57895	27.6316		100	100		100
		2nd	72	5	0	1	1	0		0	6.94444	1.38889	8.33333		100	50		85.7143
		3rd	79	10	0	2	1	1		1.26582	12.6582	2.53165	16.4557		100	75		92.3077
		SUM	227	31	0	8	2	1	Ave.	0.421941	13.5518	3.49983	17.4735		100	75		92.674
									SD
									SEM
	L5	1st	49	15	1	4	1	0		0	30.6122	8.16327	38.7755		93.75	80		90.4762
		2nd	60	13	0	5	1	0		0	21.6667	8.33333	30		100	83.3333		94.7368
		3rd	50	12	1	5	3	0		0	24	10	34		92.3077	62.5		80.9524
		SUM	159	40	2	14	5	0	Ave.	0	25.4263	8.8322	34.2585		95.3526	75.2778		88.7218
									SD
									SEM
	L6	1st	45	11	0	5	0	1		2.22222	24.4444	11.1111	37.7778		100	100		100
		2nd	56	8	0	6	1	1		1.78571	14.2857	10.7143	26.7857		100	87.5		93.3333
		3rd	52	11	0	11	0	0		0	21.1538	21.1538	42.3077		100	100		100
		SUM	153	30	0	22	1	2	Ave.	1.33598	19.9613	14.3264	35.6237		100	95.8333		97.7778
									SD
									SEM
	Hippo		GFP+	GFP+,PV+	GFP+,PV-	GFP+,SST+	GFP-,SST+	GFP+.PV+,SST+		%PV+, SST+/GFP	% PV+/GFP+	% SST+/GFP+	SUM of %PV+,SST+/GFP		% GFP+/PV+	% GFP+/SST+		% GFP+/PV+,SST+
	CA1	1st	27	9	0	7	0	2		7.40741	33.3333	25.9259	66.6667		100	100		100
		2nd	22	10	0	6	0	1		4.54545	45.4545	27.2727	77.2727		100	100		100
		3rd	29	11	0	6	0	0		0	37.931	20.6897	58.6207		100	100		100
		SUM	78	30	0	19	0	3	Ave.	3.98429	38.9063	24.6294	67.52		100	100		100
									SD
									SEM
	CA23	1st	30	6	0	4	0	1		3.33333	20	13.3333	36.6667		100	100		100
		2nd	40	4	0	7	1	0		0	10	17.5	27.5		100	87.5		91.6667
		3rd	35	5	0	3	0	0		0	14.2857	8.57143	22.8571		100	100		100
		SUM	105	15	0	14	1	1	Ave.	1.11111	14.7619	13.1349	29.0079		100	95.8333		97.2222
									SD
									SEM
	DG	1st	29	2	0	7	0	0		0	6.89655	24.1379	31.0345		100	100		100
		2nd	23	2	0	5	0	0		0	8.69565	21.7391	30.4348		100	100		100
		3rd	23	1	0	6	0	0		0	4.34783	26.087	30.4348		100	100		100
		SUM	75	5	0	18	0	0	Ave.	0	6.64668	23.988	30.6347		100	100		100
									SD
									SEM
	Total	1st	86	17	0	18	0	3		3.48837	19.7674	20.9302	44.186		100	100		100
	CA1-3&DG	2nd	85	16	0	18	1	1		1.17647	18.8235	21.1765	41.1765		100	94.7368		97.1429
		3rd	87	17	0	15	0	0		0	19.5402	17.2414	36.7816		100	100		100
		SUM	258	50	0	51	1	4	Ave.	1.55495	19.3771	19.7827	40.7147		100	98.2456		99.0476
									SD
									SEM
			% PV+, SST+	% PV+	% SST+	% PV-, SST-									% GFP+/PV+	% GFP-/PV+		% GFP+/SST+	% GFP-/SST+
		L2/3	0.421941	13.5518	3.49983	82.5265								L2/3	100	0		75	25
		L5	0	25.4263	8.8322	65.7415								L5	95.3526	4.64744		75.2778	24.7222
		L6	1.33598	19.9613	14.3264	64.3763								L6	100	0		95.8333	4.16667
		CA1	3.98429	38.9063	24.6294	32.48								CA1	100	0		100	0
		CA2/3	1.11111	14.7619	13.1349	70.9921								CA2/3	100	0		95.8333	4.16667
		DG	0	19.3771	19.7827	60.8402								DG	100	0		100	0
				GFP+	GFP+,PV+	GFP+,PV-	GFP+,SST+	GFP-,SST+	GFP+.PV+,SST+
		L2/3	SUM	227	31	0	8	2	1
		L5	SUM	159	40	2	14	5	0
		L6	SUM	153	30	0	22	1	2
		CA1	SUM	78	30	0	19	0	3
		CA2/3	SUM	105	15	0	14	1	1
		DG	SUM	75	5	0	18	0	0

## Sheet: 2R_GFP_PV_SST
4w	Ctx		GFP+	GFP+,PV+	GFP+,PV-	GFP+,SST+	GFP-,SST+	GFP+.PV+,SST+		%PV+, SST+/GFP	% PV+/GFP+	% SST+/GFP+	SUM of %PV+,SST+/GFP		% GFP+/PV+	% GFP+/SST+		% GFP+/PV+,SST+
3R	L2/3	1st	67	9	0	6	0	0		0	13.4328	8.95522	22.3881		100	100		100
		2nd	86	17	0	15	0	0		0	19.7674	17.4419	37.2093		100	100		100
		3rd	67	13	0	5	1	0		0	19.403	7.46269	26.8657		100	83.3333		94.7368
		SUM	220	39	0	26	1	0	Ave.	0	17.5344	11.2866	28.821		100	94.4444		98.2456
									SD	0	3.55675	5.3826	7.60163
									SEM	0	1.19797	5.03477	5.49511
	L5	1st	80	17	0	11	0	0		0	21.25	13.75	35		100	100		100
		2nd	69	24	0	15	3	0		0	34.7826	21.7391	56.5217		100	83.3333		92.8571
		3rd	76	24	0	8	2	1		1.31579	31.5789	10.5263	43.4211		100	81.8182		94.1176
		SUM	225	65	0	34	5	1	Ave.	0.438596	29.2039	15.3385	44.9809		100	88.3838		95.6583
									SD	0.759671	7.07204	5.77272	10.8453
									SEM	0.438596	2.79961	5.62513	7.15602
	L6	1st	32	6	0	4	0	0		0	18.75	12.5	31.25		100	100		100
		2nd	52	11	0	8	0	0		0	21.1538	15.3846	36.5385		100	100		100
		3rd	57	10	0	5	0	0		0	17.5439	8.77193	26.3158		100	100		100
		SUM	141	27	0	17	0	0	Ave.	0	19.1492	12.2188	31.3681		100	100		100
									SD	0	1.83781	3.3153	5.11236
									SEM	0	1.80867	3.30734	5.11145
	Hippo		GFP+	GFP+,PV+	GFP+,PV-	GFP+,SST+	GFP-,SST+	GFP+.PV+,SST+
	CA1	1st	25	9	0	10	0	0		0	36	40	76		100	100		100
		2nd	34	12	0	7	0	0		0	35.2941	20.5882	55.8824		100	100		100
		3rd	32	10	0	7	0	2		6.25	31.25	21.875	59.375		100	100		100
		SUM	91	31	0	24	0	2	Ave.	2.08333	34.1814	27.4877	63.7525		100	100		100
									SD	3.60844	2.56306	10.855	10.7495
									SEM	2.08333	2.0891	3.66883	3.94333
	CA23	1st	34	11	0	4	0	2		5.88235	32.3529	11.7647	50		100	100		100
		2nd	37	10	0	10	0	0		0	27.027	27.027	54.0541		100	100		100
		3rd	46	10	0	7	0	0		0	21.7391	15.2174	36.9565		100	100		100
		SUM	117	31	0	21	0	2	Ave.	1.96078	27.0397	18.003	47.0035		100	100		100
									SD	3.39618	5.30692	8.00341	8.93395
									SEM	1.96078	3.05663	6.17333	8.59242
	DG	1st	30	7	0	2	0	0		0	23.3333	6.66667	30		100	100		100
		2nd	43	6	0	11	0	0		0	13.9535	25.5814	39.5349		100	100		100
		3rd	42	11	0	8	0	0		0	26.1905	19.0476	45.2381		100	100		100
		SUM	115	24	0	21	0	0	Ave.	0	21.1591	17.0986	38.2577		100	100		100
									SD	0	6.40167	9.60681	7.69892
									SEM	0	6.1506	4.44311	3.71673
	Total	1st	89	27	0	16	0	2		2.24719	30.3371	17.9775	50.5618		100	100		100
	CA1-3&DG	2nd	114	28	0	28	0	0		0	24.5614	24.5614	49.1228		100	100		100
		3rd	120	31	0	22	0	2		1.66667	25.8333	18.3333	45.8333		100	100		100
		SUM	323	86	0	66	0	4	Ave.	1.30462	26.9106	20.2908	48.506		100	100		100
									SD	1.16652	3.0348	3.70277	2.42383
									SEM	0.673492	1.17594	3.18483	1.74853
			% PV+, SST+	% PV+	% SST+	% PV-, SST-									% GFP+/PV+	% GFP-/PV+		% GFP+/SST+	% GFP-/SST+
		L2/3	0	17.5344	11.2866	71.179								L2/3	100	0		94.4444	5.55556
		L5	0.438596	29.2039	15.3385	55.0191								L5	100	0		88.3838	11.6162
		L6	0	19.1492	12.2188	68.6319								L6	100	0		100	0
		CA1	2.08333	34.1814	27.4877	36.2475								CA1	100	0		100	0
		CA2/3	1.96078	27.0397	18.003	52.9965								CA2/3	100	0		100	0
		DG	0	26.9106	20.2908	52.7986								DG	100	0		100	0
				GFP+	GFP+,PV+	GFP+,PV-	GFP+,SST+	GFP-,SST+	GFP+.PV+,SST+
		L2/3	SUM	220	39	0	26	1	0
		L5	SUM	225	65	0	34	5	1
		L6	SUM	141	27	0	17	0	0
		CA1	SUM	91	31	0	24	0	2
		CA2/3	SUM	117	31	0	21	0	2
		DG	SUM	115	24	0	21	0	0

## Sheet: SUM
		% PV+, SST+	% PV+	% SST+	% PV-, SST-					% PV+, SST+	% PV+	% SST+	% PV-, SST-					% PV+, SST+	% PV+	% SST+	% PV-, SST-				% GFP+/PV+	% GFP-/PV+		% GFP+/SST+	% GFP-/SST+				% GFP+/PV+	% GFP-/PV+		% GFP+/SST+	% GFP-/SST+				% GFP+/PV+	% GFP-/PV+		% GFP+/SST+	% GFP-/SST+
6R	L2/3	0	12.9409	4.43259	82.6265			6R	L5	0	24.3732	9.17379	66.453			6R	L6	0	26.1905	17.7489	56.0606		1st1	L2/3	100	0		100	0		1st1	L5	100	0		86.3095	13.6905		1st1	L6	100	0		90.2778	9.72222
3R	L2/3	0.421941	13.5518	3.49983	82.5265			3R	L5	0	25.4263	8.8322	65.7415			3R	L6	1.33598	19.9613	14.3264	64.3763		2nd	L2/3	100	0		75	25		2nd	L5	95.3526	4.64744		75.2778	24.7222		2nd	L6	100	0		95.8333	4.16667
2R	L2/3	0	17.5344	11.2866	71.179			2R	L5	0.438596	29.2039	15.3385	55.0191			2R	L6	0	19.1492	12.2188	68.6319		3rd	L2/3	100	0		94.4444	5.55556		3rd	L5	100	0		88.3838	11.6162		3rd	L6	100	0		100	0
	Ave.	0.140647	14.6757	6.40633	78.7773				Ave.	0.146199	26.3345	11.1148	62.4045				Ave.	0.445326	21.767	14.7647	63.0229			Ave.	100	0		89.8148	10.1852				98.4509	1.54915		83.3237	16.6763				100	0		95.3704	4.62963
	SD	0.243608	2.4945	4.25208	6.58054				SD	0.253224	2.54014	3.66178	6.40587				SD	0.771328	3.85229	2.79097	6.39399			SD	0	0		13.1273	13.1273				2.6832	2.6832		7.04475	7.04475				0	0		4.87762	4.87762
N=3	SEM	0.140647	1.4402	2.45494	3.79928			N=3	SEM	0.146199	1.46655	2.11413	3.69843			N=3	SEM	0.445326	2.22412	1.61137	3.69157		N=3	SEM	0	0		7.57903	7.57903				1.54915	1.54915		4.06729	4.06729				0	0		2.81609	2.81609
6R	CA1	0	27.8222	15.9507	56.2271			6R	CA2/3	1.07527	31.8729	16.7545	50.2972			6R	DG	0	11.4638	24.2464	64.2899		1st1	CA1	100	0		100	0		1st1	CA2/3	100	0		93.3333	6.66667		1st1	DG	100	0		97.9167	2.08333
3R	CA1	3.98429	38.9063	24.6294	32.48			3R	CA2/3	1.11111	14.7619	13.1349	70.9921			3R	DG	0	19.3771	19.7827	60.8402		2nd	CA1	100	0		100	0		2nd	CA2/3	100	0		95.8333	4.16667		2nd	DG	100	0		100	0
2R	CA1	2.08333	34.1814	27.4877	36.2475			2R	CA2/3	1.96078	27.0397	18.003	52.9965			2R	DG	0	26.9106	20.2908	52.7986		3rd	CA1	100	0		100	0		3rd	CA2/3	100	0		100	0		3rd	DG	100	0		100	0
	Ave.	2.02254	33.6366	22.6893	41.6515				Ave.	1.38239	24.5582	15.9642	58.0953				Ave.	0	19.2505	21.4399	59.3096			Ave.	100	0		100	0				100	0		96.3889	3.61111				100	0		99.3056	0.694444
	SD	1.99284	5.56211	6.00823	12.7626				SD	0.501226	8.8213	2.52847	11.2502				SD	0	7.7242	2.44368	5.89654			SD	0	0		0	0				0	0		3.36788	3.36788				0	0		1.20281	1.20281
N=3	SEM	1.15057	3.21128	3.46885	7.36849			N=3	SEM	0.289383	5.09298	1.45981	6.49531			N=3	SEM	0	4.45957	1.41086	3.40437			SEM	0	0		0	0				0	0		1.94444	1.94444				0	0		0.694444	0.694444
	Figure 8-left																						Figure 8-middle					Figure 8-right
		% PV+, SST+	% PV+	% SST+	% PV-, SST-																				% GFP+/PV+	% GFP-/PV+			% GFP+/SST+	% GFP-/SST+
	L2/3	0.140647	14.6757	6.40633	78.7773																			L2/3	100	0		L2/3	89.8148	10.1852
	L5	0.146199	26.3345	11.1148	62.4045																			L5	98.4509	1.54915		L5	83.3237	16.6763
	L6	0.445326	21.767	14.7647	63.0229																			L6	100	0		L6	95.3704	4.62963
	CA1	2.02254	33.6366	22.6893	41.6515																			CA1	100	0		CA1	100	0
	CA2/3	1.38239	24.5582	15.9642	58.0953																			CA2/3	100	0		CA2/3	96.3889	3.61111
	DG	0	19.2505	21.4399	59.3096																			DG	100	0		DG	99.3056	0.694444
										GFP+
		GFP+	GFP+,PV+	GFP+,PV-	GFP+,SST+	GFP-,SST+	GFP+.PV+,SST+			L2/3	L5	L6	CA1	CA2/3	DG
L2/3	SUM	184	24	0	8	0	0		1st	184	149	96	62	89	68
L5	SUM	149	36	0	14	3	0		2nd	227	159	153	78	105	75
L6	SUM	96	25	0	14	2	0		3rd	220	225	141	91	117	115
									Sum	631	533	390	231	311	258
CA1	SUM	62	17	0	10	0	0
CA2/3	SUM	89	28	0	15	1	1
DG	SUM	68	8	0	16	0	0			PV+
									1st	24	36	25	17	29	8
									2nd	32	42	32	33	16	5
									3rd	39	66	27	33	33	24
									Sum	95	144	84	83	78	37
		GFP+	GFP+,PV+	GFP+,PV-	GFP+,SST+	GFP-,SST+	GFP+.PV+,SST+
L2/3	SUM	227	31	0	8	2	1			SST+
L5	SUM	159	40	2	14	5	0			L2/3	L5	L6	CA1	CA2/3	DG
L6	SUM	153	30	0	22	1	2		1st	8	17	16	10	17	16
									2nd	11	19	25	22	16	18
CA1	SUM	78	30	0	19	0	3		3rd	27	40	17	26	23	21
CA2/3	SUM	105	15	0	14	1	1		Sum	46	76	58	58	56	55
DG	SUM	75	5	0	18	0	0
		GFP+	GFP+,PV+	GFP+,PV-	GFP+,SST+	GFP-,SST+	GFP+.PV+,SST+
L2/3	SUM	220	39	0	26	1	0
L5	SUM	225	65	0	34	5	1
L6	SUM	141	27	0	17	0	0
CA1	SUM	91	31	0	24	0	2
CA2/3	SUM	117	31	0	21	0	2
DG	SUM	115	24	0	21	0	0
