# Supplementary material for: Scn1a-GFP transgenic mouse revealed Nav1.1 expression in neocortical pyramidal tract projection neurons
Source: eLife. 2023 May 23;12:e87495. doi: 10.7554/eLife.87495 (PMC10205085; doi:10.7554/eLife.87495)
Supplement: Figure 9—source data 1. [file elife-87495-fig9-data1.xlsx]

## Sheet: SUM_L2
	Area	Mean_Int				Area	Mean_Int					Area	Mean_Int
1	913	91.77		6R_1st	6	1201	122.504	PV		1st	4	992	86.752	SST
2	1141	118.916			17	829	103.392	PV			24	614	75.811	SST
3	820	53.735			18	853	159.791	PV			49	788	73.357	SST
5	1018	80.367			40	916	162.1	PV		3rd	4	934	86.817	SST
7	519	68.295			42	1032	118.521	PV			11	901	85.445	SST
8	1130	62.861			62	954	129.238	PV			31	952	107.588	SST
9	1068	86.534		6R_3rd	10	1161	116.69	PV			4	1012	71.88	SST
10	670	93.075			21	1537	87.524	PV			28	1064	50.992	SST
11	1346	80.778			37	1168	91.409	PV			33	1275	54.688	SST
12	1243	69.77			45	1123	128.94	PV			37	1197	81.302	SST
13	994	62.528			48	934	136.349	PV			44	1122	65.803	SST
14	1114	72.911			49	1381	130.507	PV
15	968	73.566			50	1017	114.897	PV				986.455	76.4032
16	923	66.925		3R_1st	2	852	93.692	PV			SD	184.934	15.9797
19	1149	81.936			3	868	126.188	PV			SEM	55.7596	4.81807
20	1162	89.37			5	994	112.984	PV
21	1257	71.977			9	1025	115.562	PV			N=	11	11
22	1444	73.929			10	1438	89.538	PV
23	1146	75.552			15	1883	78.518	PV
25	893	77.434			17	871	80.023	PV
26	1188	94.417			22	945	130.423	PV
27	1022	82.799			27	1150	92.797	PV
28	648	81.369			32	1090	86.161	PV
29	869	77.27			42	935	80.292	PV
30	976	78.559
31	925	89.962			Ave.	1089.88	112.002
32	840	73.139			SD	253.759	23.9323
33	1073	83.317			SEM	51.7983	4.88516
34	1009	85.836
35	1052	89.779			N=	24	24
36	1142	63.162										N=	157
37	832	75.962
38	1023	92.715
39	1009	103.772
41	1227	84.974
43	1042	90.094
44	1030	66.461
45	943	66.695
46	1057	111.404
47	963	99.522
48	968	80.772
50	1041	65.249
51	1061	66.786
52	753	77.024
53	678	97.683
54	867	59.842
55	645	63.31
56	1160	71.953
57	1120	71.97
58	1190	98.782
59	913	77.512
60	822	83.724
61	847	63.883
63	669	85.127
1	984	65.987	3rd
2	801	102.149
3	1147	66.454
5	1523	77.492
6	1391	69.406
7	931	78.142
8	1226	69.412
9	1047	73.795
12	740	103.591
13	980	119.783
14	1242	77.684
15	878	92.644
16	815	114.642
17	1073	75.841
18	1425	76.375
19	989	77.546
20	1242	70.939
22	1313	77.776
23	1251	86.695
24	1053	80.252
25	1169	79.692
26	1685	85.306
27	818	94.351
28	1218	73.413
29	1099	84.16
30	956	79.594
32	1077	82.852
33	1275	78.627
34	1057	78.182
35	1405	103.988
36	1057	87.852
38	772	82.343
39	1136	72.859
40	882	78.205
41	927	75.556
42	746	83.359
43	595	84.679
44	829	81.306
46	532	81.288
47	935	81.975
1	934	107.963	3R_1st
6	964	62.177
7	1055	78.899
8	1079	76.338
11	1189	69.065
12	1250	62.12
13	907	95.868
14	970	68.869
16	1493	66.123
18	1139	61.495
19	1103	82.704
20	753	73.029
21	1010	67.432
23	1068	65.922
24	1379	56.048
25	868	69.952
26	1045	59.572
29	1222	57.583
30	958	79.149
31	1438	66.398
34	1222	73.236
35	1338	75.601
36	1154	94.49
38	957	55.975
39	1255	62.393
40	959	71.581
41	1024	78.428
43	1054	92.046
Ave	1037.13	79.0467
SD	210.423	13.2583
SEM	19.0508	1.20035
N=	122	122

## Sheet: SUM_L5
	Area	Mean					Area	Mean					Area	Mean
2	1529	64.831	6R_1st		6R_1st	1	935	72.865	PV		6R_1st	11	868	62.274	SST
3	1399	58.996				6	786	70.19	PV			27	696	50.773	SST
4	1389	60.526				7	959	95.333	PV			40	880	52.64	SST
5	1371	57.854				15	611	61.064	PV			41	496	49.494	SST
8	1725	81.494				16	912	98.957	PV			46	1438	55.833	SST
9	2042	63.842				18	1505	93.954	PV			47	980	61.451	SST
10	1183	60.12				20	1055	64.242	PV		6R_3rd	1	1143	54.442	SST
12	798	64.52				21	1089	79.583	PV			2	1060	60.35	SST
13	557	72.332				29	973	68.959	PV			5	1352	76.581	SST
14	1649	70.804				30	1008	71.284	PV			11	1108	56.824	SST
17	2091	64.534				31	1128	71.034	PV			12	776	54.714	SST
19	1582	52.745				32	1082	77.4	PV			13	762	56.808	SST
22	902	67.805				33	1226	77.387	PV			17	1166	60.688	SST
23	2144	68.904				45	1114	57.199	PV			25	1174	58.577	SST
24	1559	65.144			6R_3rd	3	1290	102.726	PV			35	698	57.059	SST
25	1466	64.226				6	958	80.149	PV			36	959	68.009	SST
26	631	58.074				10	1230	77.278	PV		3R_1st	7	1046	54.815	SST
28	746	57.713				14	1412	93.14	PV			10	859	62.002	SST
34	2058	53.016				18	1099	88.991	PV			20	879	55.48	SST
35	2126	60.187				23	1168	90.004	PV			32	1041	60.305	SST
36	767	70.747				28	970	96.233	PV
37	1522	54.495				29	1018	52.193	PV			Ave	969.05	58.4559
38	2160	54.168				30	1245	76.617	PV			SD	230.196	6.10224
39	579	60.105				33	1152	84.436	PV			SEM	51.4734	1.3645
42	1528	53.711			3R_1st	2	708	88.564	PV
43	1838	51.335				5	634	80.043	PV			N=	20	20
44	1335	62.639				6	751	71.917	PV
4	2088	67.201	6R_3rd			11	781	77.009	PV
7	1696	59.644				12	1298	93.039	PV
8	1617	71.977				14	824	77.256	PV
9	1421	66.078				15	875	77.421	PV
15	1326	58.931				19	1173	56.793	PV
16	1896	66.072				21	1411	81.018	PV
19	1551	65.462				23	943	62.849	PV
20	1243	70.185				25	897	65.559	PV
21	1614	64.105				28	1188	87.986	PV									N=	122
22	863	56.467				30	1053	65.417	PV
24	1936	68.338				34	1493	75.783	PV
26	2119	65.271
27	3003	56.663				Ave	1051.42	77.944
31	1030	57.588				SD	223.825	12.5291
32	1523	56.823				SEM	36.3093	2.03248
34	2327	61.949
37	1490	57.009				N=	38	38
38	1192	74.271
39	1199	59.357
40	655	70.718
1	809	56.361	3R_1st
3	941	60.549
4	945	63.617
8	1195	57.574
9	1696	61.409
13	731	66.765
16	1251	73.045
17	1326	61.777
18	1180	58.342
22	1314	64.583
24	816	83.668
26	1390	64.624
27	930	58.896
29	614	72.419
31	1629	61.21
33	1666	53.573
35	783	55.888
Ave	1401.27	62.8637
SD	508.702	6.72668
SEM	63.5878	0.840834
N=	64	64

## Sheet: SUM_L6
	Area	Mean					Area	Mean					Area	Mean
3	1764	46.236	6R_1st		6R_1st	1	968	69.699	PV		6R_1st	2	667	47.693	SST
5	1471	53.91				7	1360	62.896	PV			4	847	45.44	SST
6	1212	64.276				8	962	59.358	PV			11	1096	38.568	SST
9	1409	52.521				13	1692	61.362	PV			16	1123	47.483	SST
10	899	75.081				14	1862	77.152	PV			17	1107	47.216	SST
12	975	54.852				19	1211	58.34	PV			18	1278	52.775	SST
15	1082	53.05				25	1797	74.238	PV			23	1104	56.308	SST
20	729	50.661				30	1851	71.987	PV			29	1093	72.418	SST
21	1709	50.258				37	913	54.055	PV			33	1411	52.409	SST
22	909	50.347				38	1319	65.766	PV			35	1303	57.358	SST
24	722	58.017			6R_3rd	7	1419	86.611	PV		6R_3rd	2	674	47.751	SST
26	1050	47.024				8	1406	59.68	PV			6	1026	83.302	SST
27	1035	47.017				9	1009	58.695	PV			12	1391	50.35	SST
28	1385	43.65				19	2174	79.924	PV			14	1549	46.698	SST
31	772	47.333				21	1174	70.342	PV			20	986	48.561	SST
32	1045	49.704				24	1239	48.384	PV			23	965	45.061	SST
34	1070	49.539				25	1420	73.839	PV			26	1602	79.781	SST
36	797	45.691			3R_1st	4	1304	52.203	PV		3R_1st	2	1388	65.362	SST
1	887	45.052	6R_3rd			8	1527	86.531	PV,SST-			5	729	64.667	PV-,SST
3	1137	52.178				11	894	81.456	PV			9	1423	68.817	SST
4	1395	48.3				13	1752	56.38	PV			25	1208	86.954	SST
5	1112	48.838				15	1074	49.142	PV			35	894	47.673	SST
10	901	47.615				18	1003	59.989	PV
11	1050	46.501				21	912	72.535	PV			Ave.	1130.18	56.9384
13	640	53.523				26	1264	47.38	PV			SD	270.555	13.6913
15	882	60.413				29	1153	66.326	PV			SEM	57.6826	2.91899
16	1229	48.265				30	1344	68.022	PV
17	950	53.435				39	1295	72.346	PV			N=	22	22
18	1000	47.024				40	1685	47.888	PV
22	1128	42.44				41	1018	77.762	PV
27	727	42.165
28	1138	40.261				Ave.	1333.37	65.6763
29	803	38.885				SD	334.454	11.4196
30	849	42.084				SEM	61.0626	2.08493
1	1782	52.283	3R_1st
3	728	61.973				N=	30	30
6	1024	62.484
7	1046	49.38											N=	109
10	711	80.57
12	1249	47.896
14	786	54.335
16	753	49.054
17	697	48.395
19	1061	75.723
20	799	48.398
22	767	53.892
23	674	51.899
24	1084	55.015
27	930	59.633
28	730	48.226
31	947	54.118
32	1451	49.743
33	775	55.623
34	971	48.678
36	853	44.948
37	831	48.572
38	670	66.552
Ave	1003.19	51.9919
SD	276.12	8.28277
SEM	36.5729	1.09708
N=	57	57

## Sheet: SUM_CA1
	Area	Mean_Int				Area	Mean_Int				Area	Mean_Int
1	1410	60.372	6R_1st	6R_1st	9	1920	83.824	PV	6R_1st	3	1098	67.321	SST
2	862	75.068			10	1156	87.383	PV		4	1346	64.946	SST
5	969	52.023			11	1093	128.741	PV		7	891	75.97	SST
6	1039	86.816		6R_3rd	8	1886	75.572	PV		8	1845	69.764	SST
12	1308	50.758			9	2433	101.971	PV	6R_3rd	1	2170	67.838	SST
13	1374	83.573			10	1846	116.646	PV		4	2059	66.173	SST
14	1619	48.795			14	1442	83.354	PV		6	1521	66.79	SST
15	1047	120.24			18	1374	68.135	PV		7	1244	61.19	SST
16	1430	96.282		3R_1st	6	1276	57.274	PV	3R_1st	1	1729	73.225	SST
17	1336	51.342			7	1905	93.279	PV		2	1438	80.99	SST
2	1255	64.188	6R_3rd		9	1217	60.523	PV		3	1140	76.06	SST
3	1020	68.292			10	1177	60.6	PV		4	1282	89.329	SST
5	1810	105.059			11	1254	76.689	PV,SST-		5	1722	90.592	SST
11	1125	67.764			14	1638	83.936	PV		8	1627	98.151	SST
12	2413	66.265
13	830	108.42			Ave	1544.07	84.1376			Ave	1508	74.8814
15	1382	85.299			SD	399.019	20.8979			SD	372.157	11.0943
16	1305	73.743			SEM	106.642	5.5852			SEM	99.4631	2.96508
17	1071	59.542
19	1597	86.629			N=	14	14			N=	14	14
12	1026	67.865	3R_1st
13	874	87.455
15	1253	87.494
16	1620	81.983
Ave	1290.62	76.4695
SD	355.601	19.1568
SEM	72.5868	3.91036
N=	24	24
										N=	52

## Sheet: SUM_CA2&3
	Area	Mean_Int				Area	Mean_Int				Area	Mean_Int
3	749	58.977	6R_1st	6R_1st	2	1084	61.205	PV	6R_1st	1	1361	68.428	SST
5	904	84.147			4	1834	87.341	PV		6	1409	61.359	SST
9	888	74.82			7	1145	90.085	PV		14	1014	58.403	SST
11	672	64.39			8	1187	97.564	PV		19	1184	50.984	SST
13	809	63.822			10	855	95.485	PV		33	1636	54.616	SST
15	1544	54.141			12	903	65.285	PV		34	903	79.157	SST
17	1087	84.789			16	1285	65.23	PV	6R_3rd	4	955	59.814	SST
18	1107	69.341			21	843	84.539	PV		15	967	67.305	SST
20	823	85.618			27	2537	63.374	PV		23	1372	60.796	SST
22	999	129.185		6R_3rd	1	1602	85.534	PV	3R_1st	13	621	48.749	SST
23	1377	79.647			7	1062	87.842	PV		19	1194	63.523	SST
24	1101	77.866			8	1009	63.469	PV
25	953	73.96			9	1332	111.668	PV			1146.91	61.194
26	1139	63			10	881	87.322	PV,SST		SD	288.258	8.54424
28	1214	73.199			13	1047	110.532	PV		SEM	86.9132	2.57619
29	1428	57.032			17	1378	96.634	PV,SST
30	536	48.287			21	1237	66.1	PV		N=	11	11
31	832	58.142			28	3051	121.226	PV
32	1572	59.31		3R_1st	1	1693	79.321	PV
2	405	57.022	6R_3rd		5	1379	100.61	PV=SST?
3	1012	82.29			6	618	64.848	PV
5	784	60.971			9	1502	101.302	PV
6	1021	140.733			10	1373	89.899	PV
11	905	88.019			15	2300	58.39	PV
12	483	65.306			17	3140	75.675	PV
14	1700	68.477			18	2587	61.421	PV
16	1286	92.991
18	1283	81.651			Ave	1494.77	83.5347
19	1241	70.012			SD	685.281	17.9165
20	759	79.783			SEM	134.395	3.51371
22	507	84.507
24	520	71.46			N=	26	26
25	1555	65.077
27	615	93.676
29	1320	80.989
30	1620	88.051
2	1070	88.474	3R_1st										N=	85
3	805	80.717
4	578	77.875
7	997	82.812
8	681	62.088
11	616	68.818
12	498	54.52
14	1013	81.165
16	1135	59.448
20	1387	81.027
21	606	70.662
22	1287	58.769
Ave	987.979	74.9388
SD	343.073	17.1432
SEM	49.5183	2.47441
N=	48	48

## Sheet: SUM_DG
	Area	Mean_Int		6R_1st		Area	Mean_Int		6R_1st		Area	Mean_Int
1	875	87.965	6R_1st		7	1303	56.208	PV		4	1293	44.224	SST
2	860	86.634			10	2303	86.222	PV		11	1058	53.267	SST
3	1136	78.392		3rd	1	1927	94.252	PV	3rd	6	1662	49.766	SST			GFP_only	PV+	SST+
5	1435	82.544			4	1469	95.108	PV		11	1285	43.342	SST		Area	1242.05	1721	1382.07
6	1383	55.644			8	1981	67.452	PV		12	1745	55.311	SST		Intensity	73.6026	82.7231	51.4748
8	934	74.024			15	2095	100.028	PV		13	1608	56.122	SST
9	1008	63.83		3R_1st	1	953	90.034	PV		14	2595	45.737	SST
12	1066	69.24			20	1737	72.481	PV	3R_1st	7	1472	58.896	SST
13	874	59.937								10	791	53.826	SST
14	1336	53.48			Ave.	1721	82.7231			11	948	54.383	SST
15	1222	59.078			SD	449.912	15.55			14	1247	59.336	SST
16	1100	88.662			SEM	159.068	5.49774			15	814	48.373	SST
17	902	60.713								16	1323	48.998	SST
2	882	71.909	3rd		N=	8	8			18	1508	49.066	SST
3	852	72.913
5	1833	65.15								Ave.	1382.07	51.4748
7	1665	71.255								SD	460.841	5.16274
9	1829	90.528								SEM	123.165	1.3798
10	1524	81.132
16	1390	110.015								N=	14	14
17	1618	64.323
18	1007	101.702
2	1212	72.063	3R_1st
3	1036	95.853
4	1242	63.527
5	1219	85.963
6	2563	60.359
8	1740	51.334
9	1577	51.997										N=	60
12	929	81.186
13	1246	87.668
17	1514	47.922
19	1041	78.821
21	1140	74.004
22	1513	70.372
23	781	62.015
24	1084	86.862
25	630	77.884
Ave.	1242.05	73.6026
SD	379.184	14.6192
SEM	61.5118	2.37155			GFP+,PV-,SST-	GFP+,PV+	GFP+,PV+
N=	38	38
