# Supplementary material for: Scn1a-GFP transgenic mouse revealed Nav1.1 expression in neocortical pyramidal tract projection neurons
Source: eLife. 2023 May 23;12:e87495. doi: 10.7554/eLife.87495 (PMC10205085; doi:10.7554/eLife.87495)
Supplement: Figure 10—source data 1. [file elife-87495-fig10-data1.xlsx]

## Sheet: 1R1
1R1, 1st	AnkG+	AnkG+, Nav1.2+	AnkG+, Nav1.2-	AnkG+, Nav1.2-, Nav.1.1+	AnkG+, Nav1.2-, Nav.1.1-	AnkG+, Nav1.2+, Nav.1.1+	AnkG+, Nav1.2+, Nav.1.1-			% Nav1.2 in Nav1.1+,AnkG+	% Nav1.1 in Nav1.2+,AnkG+
L2	149	138	11	6	5	0	138		L2	0	0
L5	82	67	15	6	9	0	67		L5	0	0
L6	129	96	33	3	30	0	96		L6	0	0
1R1, 2nd									1R1, 2nd
L2	152	124	28	8	20	0	124		L2	0	0
L5	115	86	29	4	25	0	86		L5	0	0
L6	128	93	35	3	32	0	93		L6	0	0
1R1, 3rd									1R1, 3rd
L2	139	111	28	6	22	1	110		L2	14.2857	0.900901
L5	106	83	23	15	8	1	82		L5	6.25	1.20482
L6	114	92	22	2	20	0	92		L6	0	0
		L2	N=	20	47	1	372
		L5		25	42	1	235
		L6		8	82	0	281
									%	AnkG+, Nav1.2-, Nav.1.1+	AnkG+, Nav1.2-, Nav.1.1-	AnkG+, Nav1.2+, Nav.1.1+	AnkG+, Nav1.2+, Nav.1.1-				% Nav1.2 in Nav1.1+,AnkG+	% Nav1.1 in Nav1.2+,AnkG+
1R1, 1st									L2/3	4.02685	3.3557	0	92.6174			L2	0	0
L2/3				4.02685	3.3557	0	92.6174		L2	5.26316	13.1579	0	81.5789			L2	0	0
L5				7.31707	10.9756	0	81.7073		L2	4.31655	15.8273	0.719424	79.1367			L2	14.2857	0.900901
L6				2.32558	23.2558	0	74.4186			4.53552	10.7803	0.239808	84.4444				4.7619	0.3003
1R1, 2nd
L2				5.26316	13.1579	0	81.5789		L5	7.31707	10.9756	0	81.7073			L5	0	0
L5				3.47826	21.7391	0	74.7826		L5	3.47826	21.7391	0	74.7826			L5	0	0
L6				2.34375	25	0	72.6562		L5	14.1509	7.54717	0.943396	77.3585			L5	6.25	1.20482
1R1, 3rd										8.31543	13.4206	0.314465	77.9495				2.08333	0.401606
L2				4.31655	15.8273	0.719424	79.1367
L5				14.1509	7.54717	0.943396	77.3585		L6	2.32558	23.2558	0	74.4186			L6	0	0
L6				1.75439	17.5439	0	80.7018		L6	2.34375	25	0	72.6562			L6	0	0
									L6	1.75439	17.5439	0	80.7018			L6	0	0
										2.14124	21.9332	0	75.9255				0	0
									平均							平均
L2/3	440								1R1	AnkG+, Nav1.2-, Nav.1.1+	AnkG+, Nav1.2-, Nav.1.1-	AnkG+, Nav1.2+, Nav.1.1+	AnkG+, Nav1.2+, Nav.1.1-			1R1	% Nav1.2 in Nav1.1+,AnkG+	% Nav1.1 in Nav1.2+,AnkG+
L5	303								L2/3	4.53552	10.7803	0.239808	84.4444			L2/3	4.7619	0.3003
L6	371								L5	8.31543	13.4206	0.314465	77.9495			L5	2.08333	0.401606
									L6	2.14124	21.9332	0	75.9255			L6	0	0

## Sheet: 4R1
4R1, 1st	AnkG+	AnkG+, Nav1.2+	AnkG+, Nav1.2-	AnkG+, Nav1.2-, Nav.1.1+	AnkG+, Nav1.2-, Nav.1.1-	AnkG+, Nav1.2+, Nav.1.1+	AnkG+, Nav1.2+, Nav.1.1-			% Nav1.2 in Nav1.1+,AnkG+	% Nav1.1 in Nav1.2+,AnkG+
L2	127	98	29	3	26	0	98			0	0
L5	84	61	23	2	21	0	61			0	0
L6	155	106	49	4	45	0	106			0	0
4R1, 2nd
L2	138	99	39	5	34	0	99			0	0
L5	94	56	38	3	35	0	56			0	0
L6	143	93	50	3	47	0	93			0	0
4R1, 3rd
L2	138	92	46	10	36	0	92			0	0
L5	100	70	30	5	25	0	70			0	0
L6	154	102	52	3	49	0	102			0	0
		L2	N=	18	96	0	289
		L5		10	81	0	187
		L6		10	141	0	301
									%	AnkG+, Nav1.2-, Nav.1.1+	AnkG+, Nav1.2-, Nav.1.1-	AnkG+, Nav1.2+, Nav.1.1+	AnkG+, Nav1.2+, Nav.1.1-				% Nav1.2 in Nav1.1+,AnkG+	% Nav1.1 in Nav1.2+,AnkG+
4R1, 1st									L2/3	2.3622	20.4724	0	77.1654			L2	0	0
L2/3				2.3622	20.4724	0	77.1654		L2	3.62319	24.6377	0	71.7391			L2	0	0
L5				2.38095	25	0	72.619		L2	7.24638	26.087	0	66.6667			L2	0	0
L6				2.58065	29.0323	0	68.3871			4.41059	23.7324	0	71.8571				0	0
4R1, 2nd
L2				3.62319	24.6377	0	71.7391		L5	2.38095	25	0	72.619			L5	0	0
L5				3.19149	37.234	0	59.5745		L5	3.19149	37.234	0	59.5745			L5	0	0
L6				2.0979	32.8671	0	65.035		L5	5	25	0	70			L5	0	0
4R1, 3rd										3.52415	29.078	0	67.3978				0	0
L2				7.24638	26.087	0	66.6667
L5				5	25	0	70		L6	2.58065	29.0323	0	68.3871			L6	0	0
L6				1.94805	31.8182	0	66.2338		L6	2.0979	32.8671	0	65.035			L6	0	0
									L6	1.94805	31.8182	0	66.2338			L6	0	0
										2.20887	31.2392	0	66.5519				0	0
									平均							平均
L2/3	403								4R1	AnkG+, Nav1.2-, Nav.1.1+	AnkG+, Nav1.2-, Nav.1.1-	AnkG+, Nav1.2+, Nav.1.1+	AnkG+, Nav1.2+, Nav.1.1-			4R1	% Nav1.2 in Nav1.1+,AnkG+	% Nav1.1 in Nav1.2+,AnkG+
L5	278								L2/3	4.41059	23.7324	0	71.8571			L2/3	0	0
L6	452								L5	3.52415	29.078	0	67.3978			L5	0	0
									L6	2.20887	31.2392	0	66.5519			L6	0	0

## Sheet: 6R
6R, 1st	AnkG+	AnkG+, Nav1.2+	AnkG+, Nav1.2-	AnkG+, Nav1.2-, Nav.1.1+	AnkG+, Nav1.2-, Nav.1.1-	AnkG+, Nav1.2+, Nav.1.1+	AnkG+, Nav1.2+, Nav.1.1-			% Nav1.2 in Nav1.1+,AnkG+	% Nav1.1 in Nav1.2+,AnkG+
L2	165	122	43	5	38	0	122			0	0
L5	112	62	50	7	43	0	62			0	0
L6	165	106	59	3	56	0	106			0	0
6R, 2nd
L2	153	129	24	8	16	2	127			20	1.55039
L5	105	74	31	5	26	0	74			0	0
L6	150	105	45	4	41	1	104			20	0.952381
6R, 3rd
L2	139	108	31	6	25	1	107			14.2857	0.925926
L5	97	60	37	6	31	0	60			0	0
L6	157	99	58	5	53	1	98			16.6667	1.0101
									%	AnkG+, Nav1.2-, Nav.1.1+	AnkG+, Nav1.2-, Nav.1.1-	AnkG+, Nav1.2+, Nav.1.1+	AnkG+, Nav1.2+, Nav.1.1-				% Nav1.2 in Nav1.1+,AnkG+	% Nav1.1 in Nav1.2+,AnkG+
6R, 1st									L2/3	3.0303	23.0303	0	73.9394			L2	0	0
L2/3				3.0303	23.0303	0	73.9394		L2	5.22876	10.4575	1.30719	83.0065			L2	20	1.55039
L5				6.25	38.3929	0	55.3571		L2	4.31655	17.9856	0.719424	76.9784			L2	14.2857	0.925926
L6				1.81818	33.9394	0	64.2424			4.19187	17.1578	0.675538	77.9748				11.4286	0.825438
6R, 2nd
L2				5.22876	10.4575	1.30719	83.0065		L5	6.25	38.3929	0	55.3571			L5	0	0
L5				4.7619	24.7619	0	70.4762		L5	4.7619	24.7619	0	70.4762			L5	0	0
L6				2.66667	27.3333	0.666667	69.3333		L5	6.18557	31.9588	0	61.8557			L5	0	0
6R, 3rd										5.73249	31.7045	0	62.563				0	0
L2				4.31655	17.9856	0.719424	76.9784
L5				6.18557	31.9588	0	61.8557		L6	1.81818	33.9394	0	64.2424			L6	0	0
L6				3.18471	33.758	0.636943	62.4204		L6	2.66667	27.3333	0.666667	69.3333			L6	20	0.952381
									L6	3.18471	33.758	0.636943	62.4204			L6	16.6667	1.0101
										2.55652	31.6769	0.434536	65.332				12.2222	0.654161
																平均
									平均							6R
L2/3	457								6R	AnkG+, Nav1.2-, Nav.1.1+	AnkG+, Nav1.2-, Nav.1.1-	AnkG+, Nav1.2+, Nav.1.1+	AnkG+, Nav1.2+, Nav.1.1-			L2/3	11.4286	0.825438
L5	314								L2/3	4.19187	17.1578	0.675538	77.9748			L5	0	0
L6	472								L5	5.73249	31.7045	0	62.563			L6	12.2222	0.654161
									L6	2.55652	31.6769	0.434536	65.332

## Sheet: Total
							平均							Nav1.1+				Nav1.1-
		AnkG+, Nav1.2-, Nav.1.1+	AnkG+, Nav1.2-, Nav.1.1-	AnkG+, Nav1.2+, Nav.1.1+	AnkG+, Nav1.2+, Nav.1.1-			% Nav1.2 in Nav1.1+,AnkG+	% Nav1.1 in Nav1.2+,AnkG+					Nav1.2-/Nav1.2+				Nav1.2-/Nav1.2+
L2/3	1R1	4.53552	10.7803	0.239808	84.4444		L2/3	4.7619	0.3003					4.77532				95.2247
	4R1	4.41059	23.7324	0	71.8571			0	0					4.41059				95.5894
	6R	4.19187	17.1578	0.675538	77.9748			11.4286	0.825438					4.86741				95.1326
	Ave.	4.37933	17.2235	0.305115	78.0921			5.39683	0.375246					4.68444				95.3156
	SD	0.173944	6.47627	0.342471	6.29448			5.74068	0.417791					0.241589				0.241589
N=3	SEM	0.100427	3.73908	0.197726	3.63412			3.31438	0.241212					0.139482				0.139482
		AnkG+, Nav1.2-, Nav.1.1+	AnkG+, Nav1.2-, Nav.1.1-	AnkG+, Nav1.2+, Nav.1.1+	AnkG+, Nav1.2+, Nav.1.1-
L5	1R1	8.31543	13.4206	0.314465	77.9495		L5	2.08333	0.401606					8.62989				91.3701
	4R1	3.52415	29.078	0	67.3978			0	0					3.52415				96.4759
	6R	5.73249	31.7045	0	62.563			0	0					5.73249				94.2675
	Ave.	5.85735	24.7344	0.104822	69.3034			0.694444	0.133869					5.96218				94.0378
	SD	2.39808	9.88561	0.181557	7.86825			1.20281	0.231868					2.56061				2.56061
N=3	SEM	1.38453	5.70746	0.104822	4.54274			0.694444	0.133869					1.47837				1.47837
		AnkG+, Nav1.2-, Nav.1.1+	AnkG+, Nav1.2-, Nav.1.1-	AnkG+, Nav1.2+, Nav.1.1+	AnkG+, Nav1.2+, Nav.1.1-
L6	1R1	2.14124	21.9332	0	75.9255		L6	0	0					2.14124				97.8588
	4R1	2.20887	31.2392	0	66.5519			0	0					2.20887				97.7911
	6R	2.55652	31.6769	0.434536	65.332			12.2222	0.654161					2.99106				97.0089
	Ave.	2.30221	28.2831	0.144845	69.2698			4.07407	0.218054					2.44705				97.5529
	SD	0.222821	5.50351	0.25088	5.79618			7.0565	0.37768					0.472332				0.472332
N=3	SEM	0.128646	3.17745	0.144845	3.34643			4.07407	0.218054					0.272701				0.272701
		AnkG+	AnkG+	AnkG+	AnkG+			AnkG+	AnkG+	AnkG+	AnkG+
		Nav1.2-, Nav.1.1+	Nav1.2-, Nav.1.1-	Nav1.2+, Nav.1.1+	Nav1.2+, Nav.1.1-			% Nav1.2+ in Nav1.1+ cells	% Nav1.2- in Nav1.1+ cells	% Nav1.1+ in Nav1.2+ cells	% Nav1.1- in Nav1.2+ cells
	L2/3	4.37933	17.2235	0.305115	78.0921		L2/3	5.39683	94.6032	0.375246	99.6248
	L5	5.85735	24.7344	0.104822	69.3034		L5	0.694444	99.3056	0.133869	99.8661
	L6	2.30221	28.2831	0.144845	69.2698		L6	4.07407	95.9259	0.218054	99.7819
		AnkG+	AnkG+	AnkG+	AnkG+
Figure 10		Nav1.2+, Nav.1.1+	Nav1.2-, Nav.1.1+	Nav1.2+, Nav.1.1-	Nav1.2-, Nav.1.1-
	L2/3	0.305115	4.37933	78.0921	17.2235
	L5	0.104822	5.85735	69.3034	24.7344
	L6	0.144845	2.30221	69.2698	28.2831
L2/3	440	403	457	1300
L5	303	278	314	895
L6	371	452	472	1295
