# Supplementary material for: Scn1a-GFP transgenic mouse revealed Nav1.1 expression in neocortical pyramidal tract projection neurons
Source: eLife. 2023 May 23;12:e87495. doi: 10.7554/eLife.87495 (PMC10205085; doi:10.7554/eLife.87495)
Supplement: Figure 11—source data 1. [file elife-87495-fig11-data1.xlsx]

## Sheet: per_AnkG
P15, 1R1	L2				Toal	L5				Toal	L6				Toal								P15, 1R1	total					total					total
	GFP-, 2A-	GFP-,2A+	GFP+, 2A-	GFP+,2A+	AnkG+:	GFP-, 2A-	GFP-,2A+	GFP+, 2A-	GFP+,2A+	AnkG+:	GFP-, 2A-	GFP-,2A+	GFP+, 2A-	GFP+,2A+	AnkG+:								L2/3	2A	% GFP+/2A	% GFP-/2A		L5	2A	% GFP+/2A	% GFP-/2A		L6	2A	% GFP+/2A	% GFP-/2A
1st	19	42	24	11	96	14	32	17	4	67	15	45	13	5	78								1st	53	20.7547	79.2453			36	11.1111	88.8889			50	10	90
2nd	24	36	16	8	84	15	41	17	6	79	16	51	11	1	79								2nd	44	18.1818	81.8182			47	12.766	87.234			52	1.92308	98.0769
3rd	17	50	10	7	84	16	40	15	7	78	10	45	14	3	72		L2/3	GFP-, 2A-	GFP-,2A+	GFP+, 2A-	GFP+,2A+		3rd	57	12.2807	87.7193			47	14.8936	85.1064			48	6.25	93.75
					264					224					229		1R1	22.8671	48.7103	18.6508	9.77183			154	17.0724	82.9276			130	12.9236	87.0764			150	6.05769	93.9423
	19.7917	43.75	25	11.4583		20.8955	47.7612	25.3731	5.97015		19.2308	57.6923	16.6667	6.41026			4R1	25.916	54.016	14.031	6.03699
	28.5714	42.8571	19.0476	9.52381		18.9873	51.8987	21.519	7.59494		20.2532	64.557	13.9241	1.26582			6R	23.6291	57.1996	13.9842	5.18706		P15, 4R1	total					total					total
	20.2381	59.5238	11.9048	8.33333		20.5128	51.2821	19.2308	8.97436		13.8889	62.5	19.4444	4.16667			Ave.	24.1374	53.3086	15.5553	6.99863		L2/3	2A	% GFP+/2A	% GFP-/2A		L5	2A	% GFP+/2A	% GFP-/2A		L6	2A	% GFP+/2A	% GFP-/2A
	22.8671	48.7103	18.6508	9.77183		20.1319	50.314	22.041	7.51315		17.7909	61.5831	16.6784	3.94758			SD	1.58676	4.28861	2.68086	2.43897		1st	73	8.21918	91.7808			44	4.54545	95.4545			50	4	96
																	SEM	0.916113	2.47603	1.54779	1.40814		2nd	70	11.4286	88.5714			49	8.16327	91.8367			58	10.3448	89.6552
																							3rd	48	10.4167	89.5833			35	17.1429	82.8571			31	3.22581	96.7742
																	L5	GFP-, 2A-	GFP-,2A+	GFP+, 2A-	GFP+,2A+			191	10.0215	89.9785			128	9.95053	90.0495			139	5.85688	94.1431
P15, 4R1	L2					L5					L6						1R1	20.1319	50.314	22.041	7.51315
	GFP-, 2A-	GFP-,2A+	GFP+, 2A-	GFP+,2A+	AnkG+:	GFP-, 2A-	GFP-,2A+	GFP+, 2A-	GFP+,2A+	AnkG+:	GFP-, 2A-	GFP-,2A+	GFP+, 2A-	GFP+,2A+			4R1	26.6065	42.7776	25.9957	4.62019		P15, 6R	total					total					total
1st	26	67	18	6	117	28	42	23	2	95	14	48	14	2	78		6R	21.7914	47.7702	26.8254	3.613		L2/3	2A	% GFP+/2A	% GFP-/2A		L5	2A	% GFP+/2A	% GFP-/2A		L6	2A	% GFP+/2A	% GFP-/2A
2nd	21	62	8	8	99	25	45	20	4	94	12	52	18	6	88		Ave.	22.8433	46.9539	24.954	5.24878			57	10.5263	89.4737			36	2.77778	97.2222			31	3.22581	96.7742
3rd	35	43	19	5	102	19	29	26	6	80	6	30	9	1	46		SD	3.36302	3.83392	2.55666	2.02463			69	5.7971	94.2029			54	5.55556	94.4444			45	2.22222	97.7778
					318					269					212		SEM	1.94164	2.21352	1.47609	1.16892			56	8.92857	91.0714			30	13.3333	86.6667			57	3.50877	96.4912
	22.2222	57.265	15.3846	5.12821		29.4737	44.2105	24.2105	2.10526		17.9487	61.5385	17.9487	2.5641										182	8.41733	91.5827			120	7.22222	92.7778			133	2.9856	97.0144
	21.2121	62.6263	8.08081	8.08081		26.5957	47.8723	21.2766	4.25532		13.6364	59.0909	20.4545	6.81818			L6	GFP-, 2A-	GFP-,2A+	GFP+, 2A-	GFP+,2A+
	34.3137	42.1569	18.6275	4.90196		23.75	36.25	32.5	7.5		13.0435	65.2174	19.5652	2.17391			1R1	17.7909	61.5831	16.6784	3.94758
	25.916	54.016	14.031	6.03699		26.6065	42.7776	25.9957	4.62019		14.8762	61.9489	19.3228	3.85207			4R1	14.8762	61.9489	19.3228	3.85207
																	6R	27.2245	54.4321	16.681	1.66243
																	Ave.	19.9639	59.3214	17.5607	3.15403			L2/3	% GFP+/2A	% GFP-/2A			L5	% GFP+/2A	% GFP-/2A			L6	% GFP+/2A	% GFP-/2A
																	SD	6.45458	4.2382	1.52602	1.29264			1R1	17.0724	82.9276				12.9236	87.0764				6.05769	93.9423
																	SEM	3.72656	2.44693	0.881048	0.746307			4R1	10.0215	89.9785				9.95053	90.0495				5.85688	94.1431
P15, 6R	L2					L5					L6					79.374								6R	8.41733	91.5827				7.22222	92.7778				2.9856	97.0144
AnkG+:	GFP-, 2A-	GFP-,2A+	GFP+, 2A-	GFP+,2A+	AnkG+:	GFP-, 2A-	GFP-,2A+	GFP+, 2A-	GFP+,2A+	AnkG+:	GFP-, 2A-	GFP-,2A+	GFP+, 2A-	GFP+,2A+										527	11.8371	88.1629			378	10.0321	89.9679			422	4.96672	95.0333
1st	33	51	17	6	107	16	35	18	1	70	10	30	12	1	53									SD	4.60434	4.60434				2.85155					1.71864
2nd	23	65	16	4	108	23	51	21	3	98	22	44	10	1	77			GFP+		GFP-		Supplementary table S19		SEM	2.65831	2.65831				1.64634					0.992256
3rd	15	51	9	5	80	12	26	21	4	63	38	55	16	2	111		L2/3	2A+,2A-		2A+,2A-			N=		% GFP+/2A	% GFP-/2A
					295					231					241		1R1	28.4226		71.5774			527	L2/3	11.8371	88.1629
	30.8411	47.6636	15.8879	5.60748		22.8571	50	25.7143	1.42857		18.8679	56.6038	22.6415	1.88679			4R1	20.0679		79.9321			378	L5	10.0321	89.9679
	21.2963	60.1852	14.8148	3.7037		23.4694	52.0408	21.4286	3.06122		28.5714	57.1429	12.987	1.2987			6R	19.1713		80.8287			422	L6	4.96672	95.0333
	18.75	63.75	11.25	6.25		19.0476	41.2698	33.3333	6.34921		34.2342	49.5495	14.4144	1.8018			Ave.	22.554		77.446
	23.6291	57.1996	13.9842	5.18706		21.7914	47.7702	26.8254	3.613		27.2245	54.4321	16.681	1.66243			SD	5.10215		5.10215
					877					724					682		SEM	2.94573		2.94573
																	L5
		53.3086		6.99863			46.9539		5.24878			59.3214		3.15403			1R1	29.5541		70.4459
																	4R1	30.6159		69.3841
		Supplementary table S18															6R	30.4384		69.5616
																	Ave.	30.2028		69.7972
	Ave.	GFP-, 2A-	GFP-,2A+	GFP+, 2A-	GFP+,2A+												SD	0.568751		0.568751
	L2/3	24.1374	53.3086	15.5553	6.99863												SEM	0.328368		0.328368
	L5	22.8433	46.9539	24.954	5.24878
	L6	19.9639	59.3214	17.5607	3.15403												L6
																	1R1	20.626		79.374
																	4R1	23.1749		76.8251
																	6R	18.3434		81.6566
																	Ave.	20.7148		79.2852
																	SD	2.41696		2.41696
																	SEM	1.39544		1.39544
			L2/3	GFP+,2A+	GFP+, 2A-	GFP-,2A+	GFP-, 2A-			GFP+	GFP-
			1R1	9.77183	18.6508	48.7103	22.8671			28.4226	71.5774
			4R1	6.03699	14.031	54.016	25.916			20.0679	79.9321
			6R	5.18706	13.9842	57.1996	23.6291			19.1713	80.8287
			Ave.	6.99863	15.5553	53.3086	24.1374		Ave.	22.554	77.446
			SD	2.43897	2.68086	4.28861	1.58676		SD	5.10215	5.10215
			SEM	1.40814	1.54779	2.47603	0.916113		SEM	2.94573	2.94573
			L5	GFP+,2A+	GFP+, 2A-	GFP-,2A+	GFP-, 2A-
			1R1	7.51315	22.041	50.314	20.1319			29.5541	70.4459
			4R1	4.62019	25.9957	42.7776	26.6065			30.6159	69.3841
			6R	3.613	26.8254	47.7702	21.7914			30.4384	69.5616
			Ave.	5.24878	24.954	46.9539	22.8433		Ave.	30.2028	69.7972
			SD	2.02463	2.55666	3.83392	3.36302		SD	0.568751	0.568751
			SEM	1.16892	1.47609	2.21352	1.94164		SEM	0.328368	0.328368
			L6	GFP+,2A+	GFP+, 2A-	GFP-,2A+	GFP-, 2A-
			1R1	3.94758	16.6784	61.5831	17.7909			20.626	79.374
			4R1	3.85207	19.3228	61.9489	14.8762			23.1749	76.8251
			6R	1.66243	16.681	54.4321	27.2245			18.3434	81.6566
			Ave.	3.15403	17.5607	59.3214	19.9639		Ave.	20.7148	79.2852
			SD	1.29264	1.52602	4.2382	6.45458		SD	2.41696	2.41696
			SEM	0.746307	0.881048	2.44693	3.72656		SEM	1.39544	1.39544

## Sheet: P15
P15, 1R1	L2,AnkG+					L5, AnkG+					L6, AnkG+
	GFP-, 2A-	GFP-,2A+	GFP+, 2A-	GFP+,2A+		GFP-, 2A-	GFP-,2A+	GFP+, 2A-	GFP+,2A+		GFP-, 2A-	GFP-,2A+	GFP+, 2A-	GFP+,2A+
1st	19	42	24	11		14	32	17	4		15	45	13	5
2nd	24	36	16	8		15	41	17	6		16	51	11	1
3rd	17	50	10	7		16	40	15	7		10	45	14	3
SUM	60	128	50	26		45	113	49	17		41	141	38	9
		68.8525		31.4286			69.5652		19.0476			75		27.7778
		60		33.3333			73.2143		26.087			76.1194		8.33333
		74.6269		41.1765			71.4286		31.8182			81.8182		17.6471
		67.8264		35.3128			71.4027		25.6509			77.6459		17.9194
	N=	188		76			158		66			182		47
P15, 4R1	L2,AnkG+					L5, AnkG+					L6, AnkG+
	GFP-, 2A-	GFP-,2A+	GFP+, 2A-	GFP+,2A+		GFP-, 2A-	GFP-,2A+	GFP+, 2A-	GFP+,2A+		GFP-, 2A-	GFP-,2A+	GFP+, 2A-	GFP+,2A+
1st	26	67	18	6		28	42	23	2		14	48	14	2
2nd	21	62	8	8		25	45	20	4		12	52	18	6
3rd	35	43	19	5		19	29	26	6		6	30	9	1
SUM	82	172	45	19		72	116	69	12		32	130	41	9
		72.043		25			60		8			77.4194		12.5
		74.6988		50			64.2857		16.6667			81.25		25
		55.1282		20.8333			60.4167		18.75			83.3333		10
		67.29		31.9444			61.5675		14.4722			80.6676		15.8333
	N=	254		64			188		81			162		50
P15, 6R	L2,AnkG+					L5, AnkG+					L6, AnkG+
	GFP-, 2A-	GFP-,2A+	GFP+, 2A-	GFP+,2A+		GFP-, 2A-	GFP-,2A+	GFP+, 2A-	GFP+,2A+		GFP-, 2A-	GFP-,2A+	GFP+, 2A-	GFP+,2A+
1st	33	51	17	6		16	35	18	1		10	30	12	1
2nd	23	65	16	4		23	51	21	3		22	44	10	1
3rd	15	51	9	5		12	26	21	4		38	55	16	2
SUM	71	167	42	15		51	112	60	8		70	129	38	4
		60.7143		26.087			68.6275		5.26316			75		7.69231
		73.8636		20			68.9189		12.5			66.6667		9.09091
		77.2727		35.7143			68.4211		16			59.1398		11.1111
		70.6169		27.2671			68.6558		11.2544			66.9355		9.29811
	N=	238		57			163		68			199		42
		68.5778		31.5081			67.2087		17.1258			75.083		14.3503
	N(SUM)=	680		197			509		215			543		139
		L2					L5					L6
		Nav1.2+/GFP-					Nav1.2+/GFP-					Nav1.2+/GFP-
	P15, 1R1	67.8264					71.4027					77.6459
	P15, 4R1	67.29					61.5675					80.6676
	P15, 6R	70.6169					68.6558					66.9355
	Average	68.5778					67.2087					75.083
	SD	1.78617					5.0748					7.21587
	SEM	1.03125					2.92994					4.16609
		Nav1.2+/GFP+					Nav1.2+/GFP+					Nav1.2+/GFP+
	P15, 1R1	35.3128					25.6509					17.9194
	P15, 4R1	31.9444					14.4722					15.8333
	P15, 6R	27.2671					11.2544					9.29811
	Average	31.5081					17.1258					14.3503
	SD	4.04056					7.55621					4.49791
	SEM	2.33282					4.36258					2.59687
			GFP-,Nav1.2+	GFP-,Nav1.2-
		L2/3	68.58	31.42
		L5	67.21	32.79
		L6	75.08	24.92
	Supplementary table S20
			GFP+,Nav1.2+	GFP+,Nav1.2-
		L2/3	31.51	68.49
		L5	17.13	82.87
		L6	14.35	85.65
