# Supplementary material for: Scn1a-GFP transgenic mouse revealed Nav1.1 expression in neocortical pyramidal tract projection neurons
Source: eLife. 2023 May 23;12:e87495. doi: 10.7554/eLife.87495 (PMC10205085; doi:10.7554/eLife.87495)
Supplement: Figure 12—figure supplement 1—source data 1. [file elife-87495-fig12-figsupp1-data1.xlsx]

## Sheet: 07301L
P15																						cells				%
0730_1L			FEZF2+	AnkG+,Nav1.1+	AnkG+,Nav1.1-	AnkG-	AnkG-,Nav1.1+	%Nav1.1/FEZF2	%AnkG+/FEZF2	Nav1.1+	Nav1.1+,AnkG+	Nav1.1+,AnkG+,FEZF2+	FEZF2-	%FEZF2/Nav1.1				Nav1.1+,FEZF2-	Nav1.1+,FEZF2+	Nav1.1-,FEZF2-	Nav1.1-,FEZF2+	toatl				Nav1.1+,FEZF2-	Nav1.1+,FEZF2+	Nav1.1-,FEZF2-	Nav1.1-,FEZF2+
Layer5		1st	72	3	45	24	NA	6.25	66.6667	1st	24	3	21	12.5				21	3	141	45	210				10	1.42857	67.1429	21.4286
		2nd	94	11	31	52	NA	26.1905	44.6809	2nd	19	11	8	57.8947				11	8	134	31	184				5.97826	4.34783	72.8261	16.8478
		3rd	77	3	31	21		8.82353	72.7273	3rd	17	3	14	17.6471				13	3	147	31	194				6.70103	1.54639	75.7732	15.9794
			243	17	107		平均	13.7547	61.3583		60	17	43	29.3473								588				7.55976	2.44093	71.914	18.0853
																						cells				%
			FEZF2+	AnkG+,Nav1.1+	AnkG+,Nav1.1-	AnkG-	AnkG-,Nav1.1+	%Nav1.1/FEZF2	%AnkG+/FEZF2	Nav1.1+	Nav1.1+,AnkG+	Nav1.1+,AnkG+,FEZF2+	FEZF2-	%FEZF2/Nav1.1				Nav1.1+,FEZF2-	Nav1.1+,FEZF2+	Nav1.1-,FEZF2-	Nav1.1-,FEZF2+	toatl				Nav1.1+,FEZF2-	Nav1.1+,FEZF2+	Nav1.1-,FEZF2-	Nav1.1-,FEZF2+
Layer6		1st	78	0	25	53	NA	0	32.0513	1st	4	0	4	0				4	0	156	25	185				2.16216	0	84.3243	13.5135
		2nd	75	0	25	50	NA	0	33.3333	2nd	7	0	7	0				7	0	157	25	189				3.7037	0	83.0688	13.2275
		3rd	114	0	46	68	NA	0	40.3509	3rd	5	0	5	0				5	0	155	46	206				2.42718	0	75.2427	22.3301
			267	0	96		平均	0	35.2452		16	0	16	0								580				2.76435	0	80.8786	16.357
				%Nav1.1/FEZF2							%FEZF2/Nav1.1
				1	2	3	Ave.				1	2	3	Ave.
								cells							cells
			L5	6.25	26.1905	8.82353	13.7547	124		L5	12.5	57.8947	17.6471	29.3473	60
			L6	0	0	0	0	96		L6	0	0	0	0	16
				%AnkG+/FEZF2
				1	2	3	Ave.
								cells
			L5	66.6667	44.6809	72.7273	61.3583	243
			L6	32.0513	33.3333	40.3509	35.2452	267

## Sheet: 07304L
P15																						cells				%
0730_4L			FEZF2+	AnkG+,Nav1.1+	AnkG+,Nav1.1-	AnkG-	AnkG-,Nav1.1+	%Nav1.1/FEZF2	%AnkG+/FEZF2	Nav1.1+	Nav1.1+,AnkG+	Nav1.1+,AnkG+,FEZF2+	FEZF2-	%FEZF2/Nav1.1				Nav1.1+,FEZF2-	Nav1.1+,FEZF2+	Nav1.1-,FEZF2-	Nav1.1-,FEZF2+	toatl				Nav1.1+,FEZF2-	Nav1.1+,FEZF2+	Nav1.1-,FEZF2-	Nav1.1-,FEZF2+
Layer5		1st	62	1	24	37	NA	4	40.3226	1st	13	1	12	7.69231				12	1	131	24	168				7.14286	0.595238	77.9762	14.2857
		2nd	88	1	27	60	NA	3.57143	31.8182	2nd	8	1	7	12.5				7	1	110	27	145				4.82759	0.689655	75.8621	18.6207
		3rd	90	5	29	56		14.7059	37.7778	3rd	10	5	5	50				5	5	113	29	152				3.28947	3.28947	74.3421	19.0789
			240	7	80		平均	7.42577	36.6395		31	7	24	23.3974								465				5.08664	1.52479	76.0601	17.3285
																						cells				%
			FEZF2+	AnkG+,Nav1.1+	AnkG+,Nav1.1-	AnkG-	AnkG-,Nav1.1+	%Nav1.1/FEZF2	%AnkG+/FEZF2	Nav1.1+	Nav1.1+,AnkG+	Nav1.1+,AnkG+,FEZF2+	FEZF2-	%FEZF2/Nav1.1				Nav1.1+,FEZF2-	Nav1.1+,FEZF2+	Nav1.1-,FEZF2-	Nav1.1-,FEZF2+	toatl				Nav1.1+,FEZF2-	Nav1.1+,FEZF2+	Nav1.1-,FEZF2-	Nav1.1-,FEZF2+
Layer6		1st	140	0	49	91	NA	0	35	1st	5	0	5	0				5	0	197	49	251				1.99203	0	78.4861	19.5219
		2nd	100	0	25	75	NA	0	25	2nd	3	0	3	0				3	0	116	25	144				2.08333	0	80.5556	17.3611
		3rd	130	1	39	90	NA	2.5	30.7692	3rd	4	1	3	25				3	1	168	39	211				1.4218	0.473934	79.6209	18.4834
			370	1	113		平均	0.833333	30.2564		12	1	11	8.33333								606				1.83239	0.157978	79.5542	18.4555
				%Nav1.1/FEZF2							%FEZF2/Nav1.1
				1	2	3	Ave.				1	2	3	Ave.
								cells							cells
			L5	4	3.57143	14.7059	7.42577	87		L5	7.69231	12.5	50	23.3974	31
			L6	0	0	2.5	0.833333	114		L6	0	0	25	8.33333	13
				%AnkG+/FEZF2
				1	2	3	Ave.
								cells
			L5	40.3226	31.8182	37.7778	36.6395	240
			L6	35	25	30.7692	30.2564	370

## Sheet: 07302L
P15																						cells				%
0730_2L			FEZF2+	AnkG+,Nav1.1+	AnkG+,Nav1.1-	AnkG-	AnkG-,Nav1.1+	%Nav1.1/FEZF2	%AnkG+/FEZF2	Nav1.1+	Nav1.1+,AnkG+	Nav1.1+,AnkG+,FEZF2+	FEZF2-	%FEZF2/Nav1.1				Nav1.1+,FEZF2-	Nav1.1+,FEZF2+	Nav1.1-,FEZF2-	Nav1.1-,FEZF2+	toatl				Nav1.1+,FEZF2-	Nav1.1+,FEZF2+	Nav1.1-,FEZF2-	Nav1.1-,FEZF2+
Layer5		1st	97	3	34	40	NA	8.10811	58.7629	1st	4	3	1	75				1	3	111	34	149				0.671141	2.01342	74.4966	22.8188
		2nd	92	5	34	53	NA	12.8205	42.3913	2nd	10	5	5	50				5	5	126	34	170				2.94118	2.94118	74.1176	20
		3rd	96	6	33	57		15.3846	40.625	3rd	10	4	6	40				4	6	145	33	188				2.12766	3.19149	77.1277	17.5532
			285	14	101		平均	12.1044	47.2597		24	12	12	55								507				1.91333	2.71536	75.2473	20.124
																						cells				%
			FEZF2+	AnkG+,Nav1.1+	AnkG+,Nav1.1-	AnkG-	AnkG-,Nav1.1+	%Nav1.1/FEZF2	%AnkG+/FEZF2	Nav1.1+	Nav1.1+,AnkG+	Nav1.1+,AnkG+,FEZF2+	FEZF2-	%FEZF2/Nav1.1				Nav1.1+,FEZF2-	Nav1.1+,FEZF2+	Nav1.1-,FEZF2-	Nav1.1-,FEZF2+	toatl				Nav1.1+,FEZF2-	Nav1.1+,FEZF2+	Nav1.1-,FEZF2-	Nav1.1-,FEZF2+
Layer6		1st	125	1	34	90	NA	2.85714	28	1st	6	1	5	16.6667				5	1	152	34	192				2.60417	0.520833	79.1667	17.7083
		2nd	132	1	36	95	NA	2.7027	28.0303	2nd	5	1	4	20				4	1	111	36	152				2.63158	0.657895	73.0263	23.6842
		3rd	112	3	39	70	NA	7.14286	37.5	3rd	6	3	3	50				3	3	128	39	173				1.7341	1.7341	73.9884	22.5434
			369	5	109		平均	4.23423	31.1768		17	5	12	28.8889								517				2.32328	0.970944	75.3938	21.312
				%Nav1.1/FEZF2							%FEZF2/Nav1.1
				1	2	3	Ave.				1	2	3	平均
								cells							cells
			L5	8.10811	12.8205	15.3846	12.1044	115		L5	75	50	40	55	24
			L6	2.85714	2.7027	7.14286	4.23423	114		L6	16.6667	20	50	28.8889	22
				%AnkG+/FEZF2
				1	2	3	Ave.
								cells
			L5	58.7629	42.3913	40.625	47.2597	285
			L6	28	28.0303	37.5	31.1768	369

## Sheet: total
	%
0731_1L	Nav1.1+,FEZF2-	Nav1.1+,FEZF2+	Nav1.1-,FEZF2-	Nav1.1-,FEZF2+
L5	7.55976	2.44093	71.914	18.0853
L6	2.76435	0	80.8786	16.357
0731_4L														cells			AnkG+
									Nav1.1+,FEZF2-	Nav1.1+,FEZF2+	Nav1.1-,FEZF2-	Nav1.1-,FEZF2+		N=			Nav1.1+,FEZF2+/-		FEZF2+,Nav1.1+/-		Nav1.1-,FEZF2+/-		FEZF2-,Nav1.1+/-
L5	5.08664	1.52479	76.0601	17.3285			L5	0731_1L	7.55976	2.44093	71.914	18.0853		588	L5	0731_1L	10.0007		20.5262		89.9993		79.4738
L6	1.83239	0.157978	79.5542	18.4555				0731_4L	5.08664	1.52479	76.0601	17.3285				0731_4L	6.61143		18.8532		93.3886		81.1468
								0731_2L	1.91333	2.71536	75.2473	20.124				0731_2L	4.62869		22.8394		95.3713		77.1606
								Ave.	4.85324	2.22703	74.4072	18.5126					7.08027		20.7396		92.9197		79.2604
								SD	2.83045	0.623444	2.19702	1.44593					2.71652		2.00161		2.71652		2.00161
0731_2L								SEM	1.63416	0.359945	1.26845	0.834808					1.56838		1.15563		1.56838		1.15563
L5	1.91333	2.71536	75.2473	20.124			L6	0731_1L	2.76435	0	80.8786	16.357		580	L6	0731_1L	2.76435		16.357		97.2356		83.643
L6	2.32328	0.970944	75.3938	21.312				0731_4L	1.83239	0.157978	79.5542	18.4555				0731_4L	1.99037		18.6135		98.0096		81.3865
								0731_2L	2.32328	0.970944	75.3938	21.312				0731_2L	3.29423		22.2829		96.7058		77.7171
								Ave.	2.30667	0.376307	78.6089	18.7082					2.68298		19.0845		97.317		80.9155
								SD	0.466203	0.520993	2.86198	2.48711					0.655728		2.99088		0.655728		2.99088
								SEM	0.269162	0.300796	1.65237	1.43593					0.378585		1.72679		0.378585		1.72679
									SEM
			%	Nav1.1+,FEZF2+	Nav1.1+,FEZF2-	Nav1.1-,FEZF2+	Nav1.1-,FEZF2-		Nav1.1+,FEZF2+	Nav1.1+,FEZF2-	Nav1.1-,FEZF2+	Nav1.1-,FEZF2-
			L5	2.22703	4.85324	18.5126	74.4072		0.359945	1.63416	0.834808	1.26845		588
			L6	0.376307	2.30667	18.7082	78.6089		0.300796	0.269162	1.43593	1.65237		580
			Supplementary figuer S8-left
			%	Nav1.1+,FEZF2+	Nav1.1-,FEZF2+	Nav1.1+,FEZF2-	Nav1.1-,FEZF2-		Nav1.1+,FEZF2+	Nav1.1-,FEZF2+	Nav1.1+,FEZF2-	Nav1.1-,FEZF2-
			L5	2.22703	18.5126	4.85324	74.4072		0.359945	0.834808	1.63416	1.26845
			L6	0.376307	18.7082	2.30667	78.6089		0.300796	1.43593	0.269162	1.65237

## Sheet: 1A_vs_ FEZF2
	%Nav1.1/FEZF2							%FEZF2/Nav1.1
0730_1L	1	2	3	平均				1	2	3	平均
L5	6.25	26.1905	8.82353	13.7547			L5	12.5	57.8947	17.6471	29.3473
L6	0	0	0	0			L6	0	0	0	0
	%Nav1.1/FEZF2							%FEZF2/Nav1.1
	1	2	3	平均				1	2	3	平均
L5	4	3.57143	14.7059	7.42577			L5	7.69231	12.5	50	23.3974
L6	0	0	2.5	0.833333			L6	0	0	25	8.33333
	%Nav1.1/FEZF2							%FEZF2/Nav1.1
	1	2	3	平均				1	2	3	平均
L5	8.11	12.82	15.38	12.1			L5	75	50	40	55
L6	2.86	2.7	7.14	4.23			L6	16.6667	20	50	28.8889
	%Nav1.1/FEZF2					SEM	%FEZF2/Nav1.1						SEM
	4L	244L	246R	平均	SD	N=3		4L	244L	246R	平均	SD	N=3
L5	13.7547	7.42577	12.1	11.0935	3.28231	1.89504	L5	29.3473	23.3974	55	35.9149	16.7938	9.69589
L6	0	0.833333	4.23	1.68778	2.24071	1.29367	L6	0	8.33333	28.8889	12.4074	14.8691	8.58469
	Supplementary figure S8-right							Supplementary figure S8-middle
		%Nav1.1/FEZF2							%FEZF2/Nav1.1
	L5	11.0935	88.9065					L5	35.9149	64.0851
	L6	1.68778	98.3122					L6	12.4074	87.5926
