# Supplementary material for: Scn1a-GFP transgenic mouse revealed Nav1.1 expression in neocortical pyramidal tract projection neurons
Source: eLife. 2023 May 23;12:e87495. doi: 10.7554/eLife.87495 (PMC10205085; doi:10.7554/eLife.87495)
Supplement: Figure 12—figure supplement 2—source data 1. [file elife-87495-fig12-figsupp2-data1.xlsx]

## Sheet: 4L
P15																						cells				%
4L			FEZF2+	AnkG+,Nav1.2+	AnkG+,Nav1.2-	AnkG-	AnkG-,Nav1.2+	%Nav1.2/FEZF2	%AnkG+/FEZF2	Nav1.2+	Nav1.2+,AnkG+	Nav1.2+,AnkG+,FEZF2+	FEZF2-	%FEZF2/Nav1.2				Nav1.2+,FEZF2-	Nav1.2+,FEZF2+	Nav1.2-,FEZF2-	Nav1.2-,FEZF2+	toatl				Nav1.2+,FEZF2-	Nav1.2+,FEZF2+	Nav1.2-,FEZF2-	Nav1.2-,FEZF2+
Layer5		1st	44	15	2	27	NA	88.2353	38.6364	1st	60	15	45	25				35	15	2	23	75				46.6667	20	2.66667	30.6667
		2nd	33	6	4	23	NA	60	30.303	2nd	29	6	23	20.6897				34	6	19	4	63				53.9683	9.52381	30.1587	6.34921
		3rd	38	4	13	21		23.5294	44.7368	3rd	40	4	36	10				36	4	35	13	88				40.9091	4.54545	39.7727	14.7727
			115	25	19		Ave.	57.2549	37.8921		129	25	104	18.5632								226				47.1813	11.3564	24.1994	17.2629
																						cells				%
			FEZF2+															Nav1.2+,FEZF2-	Nav1.2+,FEZF2+	Nav1.2-,FEZF2-	Nav1.2-,FEZF2+	toatl				Nav1.2+,FEZF2-	Nav1.2+,FEZF2+	Nav1.2-,FEZF2-	Nav1.2-,FEZF2+
Layer6		1st	37	14	5	18	NA	73.6842	51.3514	1st	41	14	27	34.1463				27	14	24	5	70				38.5714	20	34.2857	7.14286
		2nd	23	4	5	14	NA	44.4444	39.1304	2nd	57	4	53	7.01754				53	4	39	5	101				52.4752	3.9604	38.6139	4.9505
		3rd	37	9	9	19	NA	50	48.6486	3rd	59	9	50	15.2542				50	9	29	9	97				51.5464	9.27835	29.8969	9.27835
			97	27	19		Ave.	56.0429	46.3768		157	27	130	18.806								268				47.531	11.0796	34.2655	7.1239
				%Nav1.2/FEZF2							%FEZF2/Nav1.2
				1	2	3	Ave.	Cells			1	2	3	Ave.
															cells
			L5	88.2353	60	23.5294	57.2549			L5	25	20.6897	10	18.5632	129
			L6	73.6842	44.4444	50	56.0429			L6	34.1463	7.01754	15.2542	18.806	157
				%AnkG+/FEZF2
				1	2	3	Ave.	Cells
			L5	38.6364	30.303	44.7368	37.8921	115
			L6	51.3514	39.1304	48.6486	46.3768	97

## Sheet: 244L
P15																						cells				%
244L			FEZF2+	AnkG+,Nav1.2+	AnkG+,Nav1.2-	AnkG-	AnkG-,Nav1.2+	%Nav1.2/FEZF2	%AnkG+/FEZF2	Nav1.2+	Nav1.2+,AnkG+	Nav1.2+,AnkG+,FEZF2+	FEZF2-	%FEZF2/Nav1.2				Nav1.2+,FEZF2-	Nav1.2+,FEZF2+	Nav1.2-,FEZF2-	Nav1.2-,FEZF2+	toatl				Nav1.2+,FEZF2-	Nav1.2+,FEZF2+	Nav1.2-,FEZF2-	Nav1.2-,FEZF2+
Layer5		1st	31	5	4	22	NA	55.5556	29.0323	1st	31	5	26	16.129				26	5	37	4	72				36.1111	6.94444	51.3889	5.55556
		2nd	25	4	2	19	NA	66.6667	24	2nd	53	4	49	7.54717				49	4	18	2	73				67.1233	5.47945	24.6575	2.73973
		3rd	22	2	4	16		33.3333	27.2727	3rd	46	2	44	4.34783				44	2	26	4	76				57.8947	2.63158	34.2105	5.26316
			78	11	10		Ave.	51.8519	26.7683		130	11	119	9.34134								221				53.7097	5.01849	36.7523	4.51948
																						cells				%
			FEZF2+	AnkG+,Nav1.2+	AnkG+,Nav1.2-	AnkG-	AnkG-,Nav1.2+	%Nav1.2/FEZF2	%AnkG+/FEZF2	Nav1.2+	Nav1.2+,AnkG+	Nav1.2+,AnkG+,FEZF2+	FEZF2-	%FEZF2/Nav1.2				Nav1.2+,FEZF2-	Nav1.2+,FEZF2+	Nav1.2-,FEZF2-	Nav1.2-,FEZF2+	toatl				Nav1.2+,FEZF2-	Nav1.2+,FEZF2+	Nav1.2-,FEZF2-	Nav1.2-,FEZF2+
Layer6		1st	38	8	5	20	NA	61.5385	47.3684	1st	51	8	43	15.6863				43	8	32	5	88				48.8636	9.09091	36.3636	5.68182
		2nd	36	2	4	30	NA	33.3333	16.6667	2nd	55	2	53	3.63636				53	2	32	4	91				58.2418	2.1978	35.1648	4.3956
		3rd	30	2	3	25	NA	40	16.6667	3rd	45	2	43	4.44444				43	2	25	3	73				58.9041	2.73973	34.2466	4.10959
			104	12	12		Ave.	44.9573	26.9006		151	12	139	7.92236								252				55.3365	4.67615	35.2583	4.729
				%Nav1.2/FEZF2							%FEZF2/Nav1.2
				1	2	3	Ave.				1	2	3	Ave.
															cells
			L5	55.5556	66.6667	33.3333	51.8519			L5	16.129	7.54717	4.34783	9.34134	130
			L6	61.5385	33.3333	40	44.9573			L6	15.6863	3.63636	4.44444	7.92236	151
				%AnkG+/FEZF2
				1	2	3	平均	cells
			L5	29.0323	24	27.2727	26.7683	78
			L6	47.3684	16.6667	16.6667	26.9006	104

## Sheet: 246R
P15																						cells				%
246R			FEZF2+	AnkG+,Nav1.2+	AnkG+,Nav1.2-	AnkG-	AnkG-,Nav1.2+	%Nav1.2/FEZF2	%AnkG+/FEZF2	Nav1.2+	Nav1.2+,AnkG+	Nav1.2+,AnkG+,FEZF2+	FEZF2-	%FEZF2/Nav1.2				Nav1.2+,FEZF2-	Nav1.2+,FEZF2+	Nav1.2-,FEZF2-	Nav1.2-,FEZF2+	toatl				Nav1.2+,FEZF2-	Nav1.2+,FEZF2+	Nav1.2-,FEZF2-	Nav1.2-,FEZF2+
Layer5		1st	35	7	7	11	NA	50	68.5714	1st	44	7	37	15.9091				37	7	16	7	67				55.2239	10.4478	23.8806	10.4478
		2nd	39	7	9	23	NA	43.75	41.0256	2nd	34	7	27	20.5882				27	7	14	9	57				47.3684	12.2807	24.5614	15.7895
		3rd	34	6	9	19		40	44.1176	3rd	39	6	33	15.3846				33	6	25	9	73				45.2055	8.21918	34.2466	12.3288
			108	20	25		平均	44.5833	51.2382		117	20	97	17.294								197				49.2659	10.3159	27.5629	12.8553
																						cells				%
			FEZF2+	AnkG+,Nav1.2+	AnkG+,Nav1.2-	AnkG-	AnkG-,Nav1.2+	%Nav1.2/FEZF2	%AnkG+/FEZF2	Nav1.2+	Nav1.2+,AnkG+	Nav1.2+,AnkG+,FEZF2+	FEZF2-	%FEZF2/Nav1.2				Nav1.2+,FEZF2-	Nav1.2+,FEZF2+	Nav1.2-,FEZF2-	Nav1.2-,FEZF2+	toatl				Nav1.2+,FEZF2-	Nav1.2+,FEZF2+	Nav1.2-,FEZF2-	Nav1.2-,FEZF2+
Layer6		1st	20	2	3	15	NA	40	25	1st	33	2	31	6.06061				31	2	34	3	70				44.2857	2.85714	48.5714	4.28571
		2nd	20	1	6	13	NA	14.2857	35	2nd	30	1	29	3.33333				29	1	22	1	53				54.717	1.88679	41.5094	1.88679
		3rd	16	2	10	4	NA	16.6667	75	3rd	44	2	42	4.54545				42	2	61	10	115				36.5217	1.73913	53.0435	8.69565
			56	5	19		平均	23.6508	45		107	5	102	4.64646								238				45.1748	2.16102	47.7081	4.95605
				%Nav1.2/FEZF2							%FEZF2/Nav1.2
				1	2	3	平均				1	2	3	平均	cells
			L5	50	43.75	40	44.5833			L5	15.9091	20.5882	15.3846	17.294	117
			L6	40	14.2857	16.6667	23.6508			L6	6.06061	3.33333	4.54545	4.64646	107
				%AnkG+/TBR1
				1	2	3	平均	cells
			L5	68.5714	41.0256	44.1176	51.2382	108
			L6	25	35	75	45	56

## Sheet: total
	%
4L	Nav1.2+,FEZF2-	Nav1.2+,FEZF2+	Nav1.2-,FEZF2-	Nav1.2-,FEZF2+
L5	47.1813	11.3564	24.1994	17.2629
L6	47.531	11.0796	34.2655	7.1239
	%
244L	Nav1.2+,FEZF2-	Nav1.2+,FEZF2+	Nav1.2-,FEZF2-	Nav1.2-,FEZF2+										cells			AnkG+
									Nav1.2+,FEZF2-	Nav1.2+,FEZF2+	Nav1.2-,FEZF2-	Nav1.2-,FEZF2+		N=			Nav1.2+,FEZF2+/-		FEZF2+,Nav1.2+/-		Nav1.2-,FEZF2+/-		FEZF2-,Nav1.2+/-
L5	53.7097	5.01849	36.7523	4.51948			L5	4L	47.1813	11.3564	24.1994	17.2629		226	L5	4L	58.5378		28.6193		41.4622		71.3807
L6	55.3365	4.67615	35.2583	4.729				244L	53.7097	5.01849	36.7523	4.51948		221		244L	58.7282		9.53797		41.2718		90.462
								246R	49.2659	10.3159	27.5629	12.8553		197		246R	59.5818		23.1712		40.4182		76.8288
								Ave.	50.0523	8.89693	29.5048	11.5459				Ave.	58.9493		20.4428		41.0507		79.5572
	%							SD	3.33448	3.39888	6.49789	6.47182				SD	0.55602		9.8289		0.55602		9.8289
246R	Nav1.2+,FEZF2-	Nav1.2+,FEZF2+	Nav1.2-,FEZF2-	Nav1.2-,FEZF2+				SEM	1.92516	1.96235	3.75156	3.73651				SEM	0.321018		5.67472		0.321018		5.67472
L5	49.2659	10.3159	27.5629	12.8553			L6	4L	47.531	11.0796	34.2655	7.1239		268	L6	4L	58.6106		18.2035		41.3894		81.7965
L6	45.1748	2.16102	47.7081	4.95605				244L	55.3365	4.67615	35.2583	4.729		252		244L	60.0126		9.40515		39.9874		90.5949
								246R	45.1748	2.16102	47.7081	4.95605		238		246R	47.3358		7.11707		52.6642		92.8829
								Ave.	49.3474	5.97225	39.0773	5.60299				Ave.	55.3197		11.5752		44.6803		88.4248
								SD	5.31879	4.59838	7.49095	1.32203				SD	6.94967		5.85312		6.94967		5.85312
								SEM	3.0708	2.65488	4.3249	0.763277				SEM	4.0124		3.3793		4.0124		3.3793
									SEM
			%	Nav1.2+,FEZF2+	Nav1.2+,FEZF2-	Nav1.2-,FEZF2+	Nav1.2-,FEZF2-		Nav1.2+,FEZF2-	Nav1.2+,FEZF2+	Nav1.2-,FEZF2-	Nav1.2-,FEZF2+
			L5	8.89693	50.0523	11.5459	29.5048		0.857707	1.64844	2.58985	1.02022		644
			L6	5.97225	49.3474	5.60299	39.0773		4.75979	1.2534	2.15682	3.3025		758
		Supplementary figure S9-Upper-left
			%	Nav1.2+,FEZF2+	Nav1.2-,FEZF2+	Nav1.2+,FEZF2-	Nav1.2-,FEZF2-
			L5	8.89693	11.5459	50.0523	29.5048
			L6	5.97225	5.60299	49.3474	39.0773

## Sheet: 2AとFEZF2
																											Cells	FEZF2+	FEZF2+		Nav1.2+	Nav1.2+
	%Nav1.2/FEZF2							%FEZF2/Nav1.2										%AnkG+/FEZF2										AnkG+/Nav1.2+	AnkG+/Nav1.2-		AnkG+/FEZF2-	AnkG+/FEZF2+
4L	1	2	3	Ave.			4L	1	2	3	Ave.							1	2	3	Ave.
L5	88.2353	60	23.5294	57.2549			L5	25	20.6897	10	18.5632						L5	38.6364	30.303	44.7368	37.8921
L6	73.6842	44.4444	50	56.0429			L6	34.1463	7.01754	15.2542	18.806						L6	51.3514	39.1304	48.6486	46.3768						合計	0	0		0	0
																												0			0
	%Nav1.2/FEZF2							%FEZF2/Nav1.2										%AnkG+/TBR1
244L	1	2	3	Ave.			244L	1	2	3	平均							1	2	3	Ave.
L5	55.5556	66.6667	33.3333	51.8519			L5	16.129	7.54717	4.34783	9.34134						L5	29.0323	24	27.2727	26.7683
L6	61.5385	33.3333	40	44.9573			L6	15.6863	3.63636	4.44444	7.92236						L6	47.3684	16.6667	16.6667	26.9006						4L	25	19		104	25
																											244L	27	19		119	11
																											246R	20	25		97	20
	%Nav1.2/FEZF2							%FEZF2/Nav1.2										%AnkG+/TBR1										72	63		320	56
246R	1	2	3	Ave.			246R	1	2	3	Ave.							1	2	3	Ave.							135			376
L5	50	43.75	40	44.5833			L5	15.9091	20.5882	15.3846	17.294						L5	68.5714	41.0256	44.1176	51.2382
L6	40	14.2857	16.6667	23.6508			L6	6.06061	3.33333	4.54545	4.64646						L6	25	35	75	45
																											4L	27	19		130	27
																											244L	12	12		139	12
																											246R	5	19		102	5
																												44	50		371	44
	%Nav1.2/FEZF2					SEM	%FEZF2/Nav1.2						SEM					%AnkG+/FEZF2					SEM					94			415
	4L	244L	246R	Ave.	SD	N=3		4L	244L	246R	平均	SD	N=3					4L	244L	246R	平均	SD	N=3
L5	57.2549	51.8519	44.5833	51.23	6.35863	3.67116	L5	18.5632	9.34134	17.294	15.0662	4.99831	2.88577				L5	37.8921	26.7683	51.2382	38.6329	12.2518	7.07356
L6	56.0429	44.9573	23.6508	41.5503	16.4626	9.50469	L6	18.806	7.92236	4.64646	10.4583	7.4126	4.27967				L6	46.3768	26.9006	45	39.4258	10.869	6.27521
																		%AnkG+/FEZF2
																	Cells	4L	244L	246R	SUM
																	L5	115	78	108	301
																	L6	97	104	56	257
	Supplementary figure S9-Upper-right							Supplementary figure S9-Upper-middle						Supplementary figure S9-lower
		%Nav1.2/FEZF2							%FEZF2/Nav1.2						%AnkG+/FEZF2
	L5	51.23	48.77					L5	15.0662	84.9338				L5	38.6329	61.3671
	L6	41.5503	58.4497					L6	10.4583	89.5417				L6	39.4258	60.5742
