# Supplementary material for: Scn1a-GFP transgenic mouse revealed Nav1.1 expression in neocortical pyramidal tract projection neurons
Source: eLife. 2023 May 23;12:e87495. doi: 10.7554/eLife.87495 (PMC10205085; doi:10.7554/eLife.87495)
Supplement: Figure 12—figure supplement 3—source data 1. [file elife-87495-fig12-figsupp3-data1.xlsx]

## Sheet: 1R1
1R1_1st				N=26	Factor =			adjusted values		1R1_1st					Factor =			adjusted values
Layer 5	FEZF2+	Nav1.2	GFP	Num. of neurons	0.39	(%)	% GFP+/FEZF2+;Nav1.2+	(%)		Layer 6	FEZF2+	Nav1.2	GFP	Num. of neurons	0.39	(%)	% GFP+/FEZF2+;Nav1.2+	(%)
	+	+	+	1	1	3.84615	25	8.33333			+	+	+	2	2	11.7647	40	20
	+	+	-	3	3	11.5385	75	25			+	+	-	3	3	17.6471	60	30
	+	-	+	16	6	61.5385		50			+	-	+	2	1	11.7647		10
	+	-	-	6	2	23.0769		16.6667			+	-	-	10	4	58.8235		40
				26	12									17	10
1R1_2nd				N=27
Layer 5	FEZF2+	Nav1.2	GFP	Num. of neurons		(%)		(%)		Layer 6	FEZF2+	Nav1.2	GFP	Num. of neurons		(%)		(%)
	+	+	+	3	3	11.1111	75	23.0769			+	+	+	1	1	2.7027	11.1111	5
	+	+	-	1	1	3.7037	25	7.69231			+	+	-	8	8	21.6216	88.8889	40
	+	-	+	16	6	59.2593		46.1538			+	-	+	7	3	18.9189		15
	+	-	-	7	3	25.9259		23.0769			+	-	-	21	8	56.7568		40
				27	13									37	20
Layer 5	FEZF2+	Nav1.2	GFP	Num. of neurons		(%)		(%)		Layer 6	FEZF2+	Nav1.2	GFP	Num. of neurons		(%)		(%)
	+	+	+			#DIV/0!		#DIV/0!			+	+	+			#DIV/0!		#DIV/0!
	+	+	-			#DIV/0!		#DIV/0!			+	+	-			#DIV/0!		#DIV/0!
	+	-	+			#DIV/0!		#DIV/0!			+	-	+			#DIV/0!		#DIV/0!
	+	-	-			#DIV/0!		#DIV/0!			+	-	-			#DIV/0!		#DIV/0!
adjusted values										adjusted values
1R1
L5	1st	2nd	3rd	平均						L6	1st	2nd	3rd	平均
FEZF2+, Nav1.2+, GFP+	8.33333	23.0769		15.7051							20	5		12.5
FEZF2+, Nav1.2+, GFP-	25	7.69231		16.3462							30	40		35
FEZF2+, Nav1.2-, GFP+	50	46.1538		48.0769							10	15		12.5
FEZF2+, Nav1.2-, GFP-	16.6667	23.0769		19.8718							40	40		40
			N=	25										30

## Sheet: 4R1
4R1_1st					Factor =			adjusted values		4R1_1st					Factor =			adjusted values
Layer 5	FEZF2+	Nav1.2	GFP	Num. of neurons	0.39	(%)	% GFP+/FEZF2+;Nav1.2+	(%)		Layer 6	FEZF2+	Nav1.2	GFP	Num. of neurons	0.39	(%)	% GFP+/FEZF2+;Nav1.2+	(%)
	+	+	+	1	1	2.85714	50	6.66667			+	+	+	0	0	0	0	0
	+	+	-	1	1	2.85714	50	6.66667			+	+	-	3	3	15.7895	100	33.3333
	+	-	+	26	10	74.2857		66.6667			+	-	+	1	0	5.26316		0
	+	-	-	7	3	20		20			+	-	-	15	6	78.9474		66.6667
				35	15	100								19	9	100
4R1_2nd										4R1_2nd
Layer 5	FEZF2+	Nav1.2	GFP	Num. of neurons		(%)		(%)		Layer 6	FEZF2+	Nav1.2	GFP	Num. of neurons		(%)		(%)
	+	+	+	1	1	4	100	10			+	+	+	0	0	0	0	0
	+	+	-	0	0	0	0	0			+	+	-	2	2	8	100	18.1818
	+	-	+	18	7	72		70			+	-	+	3	1	12		9.09091
	+	-	-	6	2	24		20			+	-	-	20	8	80		72.7273
				25	10	100				0				25	11	100
4R1_3rd										4R1_3rd
Layer 5	FEZF2+	Nav1.2	GFP	Num. of neurons		(%)		(%)		Layer 6	FEZF2+	Nav1.2	GFP	Num. of neurons		(%)		(%)
	+	+	+	1	1	3.84615	100	9.09091			+	+	+	0	0	0	0	0
	+	+	-	0	0	0	0	0			+	+	-	4	4	18.1818	100	36.3636
	+	-	+	21	8	80.7692		72.7273			+	-	+	1	0	4.54545		0
	+	-	-	4	2	15.3846		18.1818			+	-	-	17	7	77.2727		63.6364
				26	11	100								22	11	100
adjusted values										adjusted values
4R1										4R1
L5	1st	2nd	3rd	平均						L6	1st	2nd	3rd	平均
FEZF2+, Nav1.2+, GFP+	6.66667	10	9.09091	8.58586						FEZF2+, Nav1.2+, GFP+	0	0	0	0
FEZF2+, Nav1.2+, GFP-	6.66667	0	0	2.22222						FEZF2+, Nav1.2+, GFP-	33.3333	18.1818	36.3636	29.2929
FEZF2+, Nav1.2-, GFP+	66.6667	70	72.7273	69.798						FEZF2+, Nav1.2-, GFP+	0	9.09091	0	3.0303
FEZF2+, Nav1.2-, GFP-	20	20	18.1818	19.3939						FEZF2+, Nav1.2-, GFP-	66.6667	72.7273	63.6364	67.6768
														100
			N=	36									N=	31

## Sheet: 6R
6R_1st					Factor =			adjusted values		6R_1st					Factor =			adjusted values
Layer 5	FEZF2+	Nav1.2	GFP	Num. of neurons	0.39	(%)	% GFP+/FEZF2+;Nav1.2+	(%)		Layer 6	FEZF2+	Nav1.2	GFP	Num. of neurons	0.39	(%)	% GFP+/FEZF2+;Nav1.2+	(%)
	+	+	+	3	3	8.82353	42.8571	17.6471			+	+	+	2	2	5.40541	28.5714	10.5263
	+	+	-	4	4	11.7647	57.1429	23.5294			+	+	-	5	5	13.5135	71.4286	26.3158
	+	-	+	21	8	61.7647		47.0588			+	-	+	3	1	8.10811		5.26316
	+	-	-	6	2	17.6471		11.7647			+	-	-	27	11	72.973		57.8947
				34	17									37	19
6R_2nd										6R_2nd
Layer 5	FEZF2+	Nav1.2	GFP	Num. of neurons		(%)		(%)		Layer 6	FEZF2+	Nav1.2	GFP	Num. of neurons		(%)		(%)
	+	+	+	1	1	2.32558	16.6667	5			+	+	+	0	0	0	0	0
	+	+	-	5	5	11.6279	83.3333	25			+	+	-	3	3	18.75	100	37.5
	+	-	+	29	11	67.4419		55			+	-	+	3	1	18.75		12.5
	+	-	-	8	3	18.6047		15			+	-	-	10	4	62.5		50
				43	20									16	8
6R_3rd										6R_3rd
Layer 5	FEZF2+	Nav1.2	GFP	Num. of neurons		(%)		(%)		Layer 6	FEZF2+	Nav1.2	GFP	Num. of neurons		(%)		(%)
	+	+	+	8	8	15.6863	66.6667	29.6296			+	+	+	0	0	0	0	0
	+	+	-	4	4	7.84314	33.3333	14.8148			+	+	-	5	5	33.3333	100	55.5556
	+	-	+	37	14	72.549		51.8519			+	-	+	4	2	26.6667		22.2222
	+	-	-	2	1	3.92157		3.7037			+	-	-	6	2	40		22.2222
				51	27									15	9
adjusted values										adjusted values
6R										6R
L5	1st	2nd	3rd	Ave.						L6	1st	2nd	3rd	Ave.
FEZF2+, Nav1.2+, GFP+	17.6471	5	29.6296	17.4256						FEZF2+, Nav1.2+, GFP+	10.5263	0	0	3.50877
FEZF2+, Nav1.2+, GFP-	23.5294	25	14.8148	21.1147						FEZF2+, Nav1.2+, GFP-	26.3158	37.5	55.5556	39.7904
FEZF2+, Nav1.2-, GFP+	47.0588	55	51.8519	51.3036						FEZF2+, Nav1.2-, GFP+	5.26316	12.5	22.2222	13.3285
FEZF2+, Nav1.2-, GFP-	11.7647	15	3.7037	10.1561						FEZF2+, Nav1.2-, GFP-	57.8947	50	22.2222	43.3723
			N=	64									N=	36

## Sheet: total
																							adjusted values
																							1R1								1R1
																							L5	1st	2nd	3rd	Ave.				L6	1st	2nd	3rd	Ave.
																							FEZF2+, Nav1.2+, GFP+	8.33333	23.0769		15.7051				FEZF2+, Nav1.2+, GFP+	20	5		12.5
																							FEZF2+, Nav1.2+, GFP-	25	7.69231		16.3462				FEZF2+, Nav1.2+, GFP-	30	40		35
																							FEZF2+, Nav1.2-, GFP+	50	46.1538		48.0769				FEZF2+, Nav1.2-, GFP+	10	15		12.5
																							FEZF2+, Nav1.2-, GFP-	16.6667	23.0769		19.8718				FEZF2+, Nav1.2-, GFP-	40	40		40
																							4R1								4R1
																							L5	1st	2nd	3rd	Ave.				L6	1st	2nd	3rd	Ave.
																							FEZF2+, Nav1.2+, GFP+	6.66667	10	9.09091	8.58586				FEZF2+, Nav1.2+, GFP+	0	0	0	0
																							FEZF2+, Nav1.2+, GFP-	6.66667	0	0	2.22222				FEZF2+, Nav1.2+, GFP-	33.3333	18.1818	36.3636	29.2929
																							FEZF2+, Nav1.2-, GFP+	66.6667	70	72.7273	69.798				FEZF2+, Nav1.2-, GFP+	0	9.09091	0	3.0303
																							FEZF2+, Nav1.2-, GFP-	20	20	18.1818	19.3939				FEZF2+, Nav1.2-, GFP-	66.6667	72.7273	63.6364	67.6768
																							6R								6R
																							L5	1st	2nd	3rd	Ave.				L6	1st	2nd	3rd	Ave.
																							FEZF2+, Nav1.2+, GFP+	17.6471	5	29.6296	17.4256				FEZF2+, Nav1.2+, GFP+	10.5263	0	0	3.50877
																							FEZF2+, Nav1.2+, GFP-	23.5294	25	14.8148	21.1147				FEZF2+, Nav1.2+, GFP-	26.3158	37.5	55.5556	39.7904
																							FEZF2+, Nav1.2-, GFP+	47.0588	55	51.8519	51.3036				FEZF2+, Nav1.2-, GFP+	5.26316	12.5	22.2222	13.3285
																							FEZF2+, Nav1.2-, GFP-	11.7647	15	3.7037	10.1561				FEZF2+, Nav1.2-, GFP-	57.8947	50	22.2222	43.3723
																							L5						N=3		L6						N=3
																								6R	1R1	4R1	平均	SD	SEM			6R	1R1	4R1	平均	SD	SEM
																							FEZF2+, Nav1.2+, GFP+	15.7051	8.58586	17.4256	13.9055	4.68658	2.7058			12.5	0	3.50877	5.33626	6.44727	3.72233
																							FEZF2+, Nav1.2+, GFP-	16.3462	2.22222	21.1147	13.2277	9.82473	5.67231			35	29.2929	39.7904	34.6945	5.25543	3.03422
																							FEZF2+, Nav1.2-, GFP+	48.0769	69.798	51.3036	56.3928	11.7208	6.76699			12.5	3.0303	13.3285	9.61959	5.7215	3.30331
																							FEZF2+, Nav1.2-, GFP-	19.8718	19.3939	10.1561	16.474	5.47661	3.16192			40	67.6768	43.3723	50.3497	15.1001	8.71806
																							L5 FEZF2+								L6 FEZF2+
																							Nav1.2+,GFP+/-	32.0513	10.8081	38.5403	27.1332	14.5055	3	8.37475	Nav1.2+,GFP+/-	47.5	29.2929	43.2992	40.0307	9.53345	3	5.50414
																							Nav1.2-, GFP+/-	67.9487	89.1919	61.4597	72.8668	14.5055	3	8.37475	Nav1.2-, GFP+/-	52.5	70.7071	56.7008	59.9693	9.53345	3	5.50414
																							L5 FEZF2+								L5 FEZF2+
																							GFP+, Nav1.2+/-	63.7821	78.3838	68.7291	70.2983	7.4263	3	4.28757	GFP+, Nav1.2+/-	25	3.0303	16.8372	14.9558	11.105	3	6.41149
																							GFP-, Nav1.2+/-	36.2179	21.6162	31.2709	29.7017	7.4263	3	4.28757	GFP-, Nav1.2+/-	75	96.9697	83.1628	85.0442	11.105	3	6.41149
																								Nav1.2+, GFP+	Nav1.2+, GFP-	Nav1.2-, GFP+	Nav1.2-, GFP-
																							L5	13.9055	13.2277	56.3928	16.474
																							L6	5.33626	34.6945	9.61959	50.3497
																						Supplementary figure S10
																								FEZF2+
																								Nav1.2+, GFP+	Nav1.2-, GFP+	Nav1.2+, GFP-	Nav1.2-, GFP-
																							L5	13.9055	56.3928	13.2277	16.474
																							L6	5.33626	9.61959	34.6945	50.3497
																								L5			L6
																							1R1	N=	53		N=	54
																							4R1	N=	86		N=	66
																							6R	N=	128		N=	68
																									267			188
