# Supplementary material for: Scn1a-GFP transgenic mouse revealed Nav1.1 expression in neocortical pyramidal tract projection neurons
Source: eLife. 2023 May 23;12:e87495. doi: 10.7554/eLife.87495 (PMC10205085; doi:10.7554/eLife.87495)
Supplement: Figure 12—source data 1. [file elife-87495-fig12-data1.xlsx]

## Sheet: ctx
	Layer2/3	GFP+_only	FEZF2+_only	GFP+/FEZF2+	total GFP+	total cells	FEZF2+/GFP+(%)		total FEZF2+	GFP+/FEZF2+(%)			GFP only	FEZF2+_only	FEZF2+:GFP+			GFP+/FEZF2+(%)
	P15_1L-6	73	3	8	81	84	9.87654		11	72.7273			86.9048	3.57143	9.52381	100		36.9437
		50	17	34	84	101	40.4762		51	66.6667			49.505	16.8317	33.6634
							25.1764			69.697			68.2049	10.2016	21.5936
	P15_2L-6	53	38	37	90	128	41.1111		75	49.3333			41.4062	29.6875	28.9062
		69	9	1	70	79	1.42857		10	10			87.3418	11.3924	1.26582
		69	10	1	70	80	1.42857		11	9.09091			86.25	12.5	1.25
							14.6561			22.8081			71.666	17.86	10.474
	P15_5L-6	77	8	6	83	91	7.22892		14	42.8571			84.6154	8.79121	6.59341
		42	5	4	46	51	8.69565		9	44.4444			82.3529	9.80392	7.84314
		39	13	4	43	56	9.30233		17	23.5294			69.6429	23.2143	7.14286
							8.40896		13.3333	36.9437			78.8704	13.9365	7.19313
					567	670			198			L2/3
												1	68.2049	10.2016	21.5936
												2	71.666	17.86	10.474
												3	78.8704	13.9365	7.19313
	average					N=3	16.0805			43.1496			72.9138	13.9993	13.0869
						1st	25.1764			69.697
						2nd	14.6561			22.8081
						3rd	8.40896			36.9437
					Ave.		16.0805			43.1496
					SD		8.47397			24.0526
					N =		3			3
					SEM		4.89245			13.8868
	Layer6	GFP+_only	FEZF2+_only	GFP+/FEZF2+	total GFP+		FEZF2+/GFP+(%)		total FEZF2+	GFP+/FEZF2+(%)
	P15_1L-6	27	41	10	37		27.027		51	19.6078
		15	47	8	23		34.7826		55	14.5455
						Ave.	30.9048			17.0766
	P15_2L-6	23	29	1	24		4.16667		30	3.33333
		31	21	3	34		8.82353		24	12.5
		41	18	1	42		2.38095		19	5.26316
						Ave.	5.12372			7.03216
	P15_5L-6	12	32	0	12		0		32	0
		22	41	0	22		0		41	0
		12	31	0	12		0		31	0
						Ave.	0		34.6667	0
					206				283
	average					N=3	12.0095			8.03627
						1st	30.9048			17.0766
						2nd	5.12372			7.03216
						3rd	0			0
					Ave.		12.0095			8.03627
					SD		16.5631			8.58249
					N =		3			3
					SEM		9.56273			4.9551
	Layer2/3	GFP+_only	FEZF2+_only	GFP+/FEZF2+	total GFP+		FEZF2+/GFP+(%)		total FEZF2+	GFP+/FEZF2+(%)
	4w_2L-6	37	2	2	39		5.12821		4	50
		60	1	2	62		3.22581		3	66.6667
		46	1	5	51		9.80392		6	83.3333
						平均	6.05264			66.6667
	4w_5L-6	28	4	5	33		15.1515		9	55.5556
		75	2	1	76		1.31579		3	33.3333
		54	0	0	54		0		0	0
						平均	5.4891		4	29.6296
					315				25
						N=2	5.77087			48.1481
						1st	6.05264			66.6667
						2nd	5.4891			29.6296
					Ave.		5.77087			48.1481
					SD		0.398485			26.1891
					N =		2			2
					SEM		0.281771			18.5185
	Layer6	GFP+_only	FEZF2+_only	GFP+/FEZF2+	total GFP+		FEZF2+/GFP+(%)		total FEZF2+	GFP+/FEZF2+(%)
	4w_2L-6	39	11	14	53		26.4151		25	56
		32	9	8	40		20		17	47.0588
		43	113	8	51		15.6863		121	6.61157
						平均	20.7005			36.5568
	4w_5L-6	29	9	7	36		19.4444		16	43.75
		27	4	7	34		20.5882		11	63.6364
		14	12	0	14		0		12	0
						平均	13.3442		13	35.7955
					228				202
						N=2	17.0223			36.1761
						1st	20.7005			36.5568
						2nd	13.3442			35.7955
					Ave.		17.0223			36.1761
					SD		5.20164			0.538351
					N =		2			2
					SEM		3.67811			0.380672
	Laye5					total
	4w	GFP(+)	Fezf2(+)	GFP(+)/Fezf2(+)	GFP+	Cell num.	FEZF2+/GFP+(%)		total FEZF2+	GFP+/FEZF2+(%)
	5L_1	26	2	33	59	61	55.9322		35	94.2857
	5L_2	45	1	28	73	74	38.3562		29	96.5517
	5L_3	40	1	39	79	80	49.3671		40	97.5
					Ave.		47.8852			96.1125
	2L_1	45	0	38	83	83	45.7831		38	100
	2L_2	33	2	34	67	69	50.7463		36	94.4444
	2L_3	28	3	33	61	64	54.0984		36	91.6667
	平均				Ave.		50.2093		36.6667	95.3704
					363	Ave.	49.0472		214	95.7414
						1st	47.8852			96.1125
						2nd	50.2093			95.3704
					Ave.		49.0472			95.7414
					SD		1.64339			0.52475
					N =		2			2
					SEM		1.16205			0.371055
	Laye5
	P15	GFP(+)	Fezf2(+)	GFP(+)/Fezf2(+)						GFP+/FEZF2+(%)
	5L_1	24	5	30	54	59	55.5556		35	85.7143
	5L_2	30	9	29	59	68	49.1525		38	76.3158
	5L_3	24	11	27	51	62	52.9412		38	71.0526
					Ave.		52.5498			77.6942
	1L_2	27	6	60	87	93	68.9655		66	90.9091
	1L_3	51	12	48	99	111	48.4848		60	80
					Ave.		58.7252			85.4545
	2L_1	38	12	54	92	104	58.6957		66	81.8182
	2L_2	51	7	57	108	115	52.7778		64	89.0625
	2L_3	57	6	58	115	121	50.4348		64	90.625
	平均				Ave.		51.6063		64.6667	87.1686
					665	1st	52.5498		431	77.6942
						2nd	58.7252			85.4545
						3rd	51.6063			87.1686
					Ave.		54.2937			83.4391
					SD		3.86663			5.04848
					N =		3			3
					SEM		2.2324			2.91474

## Sheet: P15_FEZF2
Layer2/3	GFP+_only	FEZF2+_only	GFP+/FEZF2+	total GFP+	total cells	FEZF2+/GFP+(%)		total FEZF2+	GFP+/FEZF2+(%)			/total cells	GFP only	FEZF2+_only	FEZF2+:GFP+
P15_1L-6	73	3	8	81	84	9.87654		11	72.7273				86.9048	3.57143	9.52381
	50	17	34	84	101	40.4762		51	66.6667				49.505	16.8317	33.6634
						25.1764			69.697				68.2049	10.2016	21.5936
P15_2L-6	53	38	37	90	128	41.1111		75	49.3333				41.4062	29.6875	28.9062
	69	9	1	70	79	1.42857		10	10				87.3418	11.3924	1.26582
	69	10	1	70	80	1.42857		11	9.09091				86.25	12.5	1.25
						14.6561			22.8081				71.666	17.86	10.474
P15_5L-6	77	8	6	83	91	7.22892		14	42.8571				84.6154	8.79121	6.59341
	42	5	4	46	51	8.69565		9	44.4444				82.3529	9.80392	7.84314
	39	13	4	43	56	9.30233		17	23.5294				69.6429	23.2143	7.14286
						8.40896		13.3333	36.9437				78.8704	13.9365	7.19313
				567	670			198				L2/3
												1st	68.2049	10.2016	21.5936
												2nd	71.666	17.86	10.474
												3rd	78.8704	13.9365	7.19313
average					N=3	16.0805			43.1496			Ave.	72.9138	13.9993	13.0869
					1st	25.1764			69.697			SD	5.44115	3.82959	7.54743
					2nd	14.6561			22.8081			N =	3	3	3
					3rd	8.40896			36.9437			SEM	3.14145	2.21102	4.35751
				Ave.		16.0805			43.1496
				SD		8.47397			24.0526
				N =		3			3
				SEM		4.89245			13.8868
Layer5
P15	GFP(+)	Fezf2(+)	GFP(+)/Fezf2(+)	total GFP+	total cells	FEZF2+/GFP+(%)							GFP only	FEZF2+_only	FEZF2+:GFP+
1L_2	27	6	60	87	93	68.9655		66	90.9091				29.0323	6.45161	64.5161
1L_3	51	12	48	99	111	48.4848		60	80				45.9459	10.8108	43.2432
				Ave.		58.7252			85.4545				37.4891	8.63121	53.8797
5L_1	24	5	30	54	59	55.5556		35	85.7143				40.678	8.47458	50.8475
5L_2	30	9	29	59	68	49.1525		38	76.3158				44.1176	13.2353	42.6471
5L_3	24	11	27	51	62	52.9412		38	71.0526				38.7097	17.7419	43.5484
				Ave.		52.5498			77.6942				41.1684	13.1506	45.681
2L_1	38	12	54	92	104	58.6957		66	81.8182				36.5385	11.5385	51.9231
2L_2	51	7	57	108	115	52.7778		64	89.0625				44.3478	6.08696	49.5652
2L_3	57	6	58	115	121	50.4348		64	90.625				47.1074	4.95868	47.9339
平均				Ave.		51.6063		64.6667	87.1686				42.6646	7.52803	49.8074
					733			431				L5
												1	37.4891	8.63121	53.8797
												2	41.1684	13.1506	45.681
				479	1st	52.5498			85.4545			3	42.6646	7.52803	49.8074
					2nd	58.7252			77.6942			Ave.	40.4407	9.76995	49.7893
					3rd	51.6063			87.1686			SD	2.66338	2.97924	4.09939
				Ave.		54.2937			83.4391			N =	3	3	3
				SD		3.86663			5.04848			SEM	1.5377	1.72006	2.36678
				N =		3			3
				SEM		2.2324			2.91474
Layer6	GFP+_only	FEZF2+_only	GFP+/FEZF2+	total GFP+	total cells	FEZF2+/GFP+(%)		total FEZF2+	GFP+/FEZF2+(%)				GFP only	FEZF2+_only	FEZF2+:GFP+
P15_1L-6	27	41	10	37	78	27.027		51	19.6078				34.6154	52.5641	12.8205
	15	47	8	23	70	34.7826		55	14.5455				21.4286	67.1429	11.4286
						30.9048			17.0766				28.022	59.8535	12.1245
P15_2L-6	23	29	1	24	53	4.16667		30	3.33333				43.3962	54.717	1.88679
	31	21	3	34	55	8.82353		24	12.5				56.3636	38.1818	5.45455
	41	18	1	42	60	2.38095		19	5.26316				68.3333	30	1.66667
						5.12372			7.03216				56.0311	40.9663	3.00267
P15_5L-6	12	32	0	12	44	0		32	0				27.2727	72.7273	0
	22	41	0	22	63	0		41	0				34.9206	65.0794	0
	12	31	0	12	43	0		31	0				27.907	72.093	0
					平均	0		34.6667	0				30.0334	69.9666	0
				206	466			283				L6
												1	28.022	59.8535	12.1245
												2	56.0311	40.9663	3.00267
average					N=3	12.0095			8.03627			3	30.0334	69.9666	0
					1st	30.9048			17.0766			Ave.	38.0288	56.9288	5.0424
					2nd	5.12372			7.03216			SD	15.6228	14.7197	6.31439
					3rd	0			0			N =	3	3	3
				Ave.		12.0095			8.03627			SEM	9.01983	8.49842	3.64561
				SD		16.5631			8.58249
				N =		3			3
				SEM		9.56273			4.9551
					Fig12-right				Fig12-middle			Fig12-left
					%	FEZF2+/GFP+	FEZF2-/GFP+		GFP+/FEZF2+	GFP-/FEZF2+		%	GFP only	FEZF2+:GFP+	FEZF2+_only		SEM	GFP only	FEZF2+:GFP+	FEZF2+_only
					L2/3	16.0805	83.9195		43.1496	56.8504		L2/3	72.9138	13.0869	13.9993			3.14145	4.35751	2.21102
					L5	54.2937	45.7063		83.4391	16.5609		L5	40.4407	49.7893	9.76995			1.5377	2.36678	1.72006
					L6	12.0095	87.9905		8.03627	91.9637		L6	38.0288	5.0424	56.9288			9.01983	3.64561	8.49842

## Sheet: 4w_FEZF2
Layer2/3	GFP+_only	FEZF2+_only	GFP+/FEZF2+	total GFP+	total cells	FEZF2+/GFP+(%)		total FEZF2+	GFP+/FEZF2+(%)			/total cells	GFP only	FEZF2+_only	FEZF2+:GFP+
4w_2L-6	37	2	2	39	41	5.12821		4	50				90.2439	4.87805	4.87805
	60	1	2	62	63	3.22581		3	66.6667				95.2381	1.5873	3.1746
	46	1	5	51	52	9.80392		6	83.3333				88.4615	1.92308	9.61538
					平均	6.05264			66.6667				91.3145	2.79614	5.88935
4w_5L-6	28	4	5	33	37	15.1515		9	55.5556				75.6757	10.8108	13.5135
	75	2	1	76	78	1.31579		3	33.3333				96.1538	2.5641	1.28205
	54	0	0	54	54	0		0	0				100	0	0
					平均	5.4891		4	29.6296				85.9148	6.68746	7.39778
				315	325			25
												L2/3
												1	91.3145	2.79614	5.88935
average					N=2	5.77087			48.1481			2	85.9148	6.68746	7.39778
					1st	6.05264			66.6667			Ave.	88.6146	4.7418	6.64356
					2nd	5.4891			29.6296			SD	3.8182	2.75157	1.06663
												N =	2	2	2
				Ave.		5.77087			48.1481			SEM	2.69988	1.94566	0.754218
				SD		0.398485			26.1891
				N =		2			2
				SEM		0.281771			18.5185
					total
4w	GFP(+)	Fezf2(+)	GFP(+)/Fezf2(+)	GFP+	Cell num.	FEZF2+/GFP+(%)		total FEZF2+	GFP+/FEZF2+(%)			/total cells	GFP only	FEZF2+_only	FEZF2+:GFP+
5L_1	26	2	33	59	61	55.9322		35	94.2857				42.623	3.27869	54.0984
5L_2	45	1	28	73	74	38.3562		29	96.5517				60.8108	1.35135	37.8378
5L_3	40	1	39	79	80	49.3671		40	97.5				50	1.25	48.75
				平均		47.8852			96.1125				51.1446	1.96001	46.8954
2L_1	45	0	38	83	83	45.7831		38	100				54.2169	0	45.7831
2L_2	33	2	34	67	69	50.7463		36	94.4444				47.8261	2.89855	49.2754
2L_3	28	3	33	61	64	54.0984		36	91.6667				43.75	4.6875	51.5625
平均				平均		50.2093		36.6667	95.3704				51.0215	1.44928	47.5292
				363	431
												L5
					N=2,平均	49.0472		214	95.7414			1	51.1446	1.96001	46.8954
					1回目	47.8852			96.1125			2	51.0215	1.44928	47.5292
					2回目	50.2093			95.3704			Ave.	51.083	1.70464	47.2123
												SD	0.0870519	0.361146	0.448198
				Ave.		49.0472			95.7414			N =	2	2	2
				SD		1.64339			0.52475			SEM	0.061555	0.255369	0.316924
				N =		2			2
				SEM		1.16205			0.371055
Layer6	GFP+_only	FEZF2+_only	GFP+/FEZF2+	total GFP+	total cells	FEZF2+/GFP+(%)		total FEZF2+	GFP+/FEZF2+(%)			/total cells	GFP only	FEZF2+_only	FEZF2+:GFP+
4w_2L-6	39	11	14	53	64	26.4151		25	56				60.9375	17.1875	21.875
	32	9	8	40	49	20		17	47.0588				65.3061	18.3673	16.3265
	43	113	8	51	164	15.6863		121	6.61157				26.2195	68.9024	4.87805
					平均	20.7005			36.5568				50.821	34.8191	14.3599
4w_5L-6	29	9	7	36	45	19.4444		16	43.75				64.4444	20	15.5556
	27	4	7	34	38	20.5882		11	63.6364				71.0526	10.5263	18.4211
	14	12	0	14	26	0		12	0				53.8462	46.1538	0
					平均	13.3442		13	35.7955				67.7485	15.2632	16.9883
				228	386			202
												L5
												1	50.821	34.8191	14.3599
average					N=2	17.0223			36.1761			2	67.7485	15.2632	16.9883
					1st	20.7005			36.5568			Ave.	59.2848	25.0411	15.6741
					2nd	13.3442			35.7955			SD	11.9695	13.8281	1.85859
												N =	2	2	2
				Ave.		17.0223			36.1761			SEM	8.46375	9.77797	1.31422
				SD		5.20164			0.538351
				N =		2			2
				SEM		3.67811			0.380672
					Fig12-right				Fig12-middle			Fig12-left
					%	FEZF2+/GFP+	FEZF2-/GFP+		GFP+/FEZF2+	GFP-/FEZF2+		%	GFP only	FEZF2+:GFP+	FEZF2+_only		SEM	GFP only	FEZF2+:GFP+	FEZF2+_only
					L2/3	5.77087	94.2291		48.1481	51.8519		L2/3	88.6146	6.64356	4.7418			2.69988	0.754218	1.94566
					L5	49.0472	50.9528		95.7414	4.25858		L5	51.083	47.2123	1.70464			0.061555	0.316924	0.255369
					L6	17.0223	82.9777		36.1761	63.8239		L6	59.2848	15.6741	25.0411			8.46375	1.31422	9.77797
