# Supplementary material for: Scn1a-GFP transgenic mouse revealed Nav1.1 expression in neocortical pyramidal tract projection neurons
Source: eLife. 2023 May 23;12:e87495. doi: 10.7554/eLife.87495 (PMC10205085; doi:10.7554/eLife.87495)
Supplement: Figure 13—source data 1. [file elife-87495-fig13-data1.xlsx]

## Sheet: Layer2_3
	4W	5L-6	Layer2/3
		Size	Intensity/pixel	GFP+			Size	Intensity/pixel	GFP+
1st	1	227	37.542	FEZF2-	1st	23	473	51.803	FEZF2+
	2	371	34.329	FEZF2-		26	683	49.359	FEZF2+
	3	241	38.838	FEZF2-		29	608	43.928	FEZF2+
	4	257	39.973	FEZF2-		58	477	51.683	FEZF2+
	5	294	38.922	FEZF2-	2nd	54	313	55.585	FEZF2+
	6	297	37.367	FEZF2-	3rd	0	0	0
	7	466	46.438	FEZF2-
	8	328	39.823	FEZF2-		平均	510.8	50.4716
	9	412	45.973	FEZF2-
	10	658	39.435	FEZF2-	3.14465
	11	424	42.512	FEZF2-
	12	312	38.776	FEZF2-
	13	328	38.119	FEZF2-
	14	502	35.39	FEZF2-
	15	405	39.309	FEZF2-		5
	16	275	43.811	FEZF2-
	17	343	35.755	FEZF2-
	18	373	43.07	FEZF2-
	19	252	43.008	FEZF2-
	20	298	42.191	FEZF2-
	21	468	43.323	FEZF2-
	22	357	38.115	FEZF2-
	24	348	44.598	FEZF2-
	25	464	35.778	FEZF2-
	27	293	41.423	FEZF2-
	28	583	46.079	FEZF2-
	30	534	32.815	FEZF2-
	31	647	35.832	FEZF2-
	32	412	43.854	FEZF2-
	33	491	63.334	FEZF2-
	34	530	41.564	FEZF2-
	35	581	49.587	FEZF2-
	36	549	43.605	FEZF2-
	37	357	34.244	FEZF2-
	38	531	45.294	FEZF2-
	39	501	46.974	FEZF2-
	40	388	43.799	FEZF2-
	41	523	44.665	FEZF2-
	42	393	39.634	FEZF2-
	43	387	39.881	FEZF2-
	44	555	50.515	FEZF2-
	45	579	42.701	FEZF2-
	46	385	38.987	FEZF2-
	47	354	42.164	FEZF2-
	48	272	36.989	FEZF2-
	49	401	40.798	FEZF2-
	50	416	34.839	FEZF2-
	51	615	46.75	FEZF2-
	52	299	62.458	FEZF2-
	53	656	44.346	FEZF2-
	54	592	68.044	FEZF2-
	55	315	39.225	FEZF2-
	56	322	45.984	FEZF2-
	57	342	39.88	FEZF2-
2nd	1	279	38.366	FEZF2-
	2	309	43.706	FEZF2-
	3	392	47.173	FEZF2-
	4	401	45.217	FEZF2-
	5	486	82.506	FEZF2-
	6	294	49.34	FEZF2-
	7	334	62.826	FEZF2-
	8	346	45.127	FEZF2-
	9	301	44.518	FEZF2-
	10	389	42.99	FEZF2-
	11	514	71.091	FEZF2-
	12	297	43.017	FEZF2-
	13	368	44.511	FEZF2-
	14	349	48.436	FEZF2-
	15	460	51.68	FEZF2-
	16	459	57.357	FEZF2-
	17	389	52.632	FEZF2-
	18	309	45.036	FEZF2-
	19	500	54.252	FEZF2-
	20	317	39.685	FEZF2-
	21	294	50.959	FEZF2-
	22	221	43.33	FEZF2-
	23	396	52.962	FEZF2-
	24	411	52.538	FEZF2-
	25	309	48.22	FEZF2-
	26	384	49.068	FEZF2-
	27	321	56.611	FEZF2-
	28	398	44.158	FEZF2-
	29	389	44.409	FEZF2-
	30	300	55.357	FEZF2-
	31	529	49.376	FEZF2-
	32	315	49.165	FEZF2-
	33	361	57.078	FEZF2-
	34	416	42.579	FEZF2-
	35	296	52.551	FEZF2-
	36	565	51.294	FEZF2-
	37	336	49.604	FEZF2-
	38	326	49.675	FEZF2-
	39	414	48.901	FEZF2-
	40	226	40.336	FEZF2-
	41	489	47.47	FEZF2-
	42	442	49.683	FEZF2-
	43	397	44.829	FEZF2-
	44	339	54.726	FEZF2-
	45	269	49.297	FEZF2-
	46	431	78.747	FEZF2-
	47	358	55.092	FEZF2-
	48	315	46.917	FEZF2-
	49	401	56.985	FEZF2-
	50	367	49.629	FEZF2-
	51	296	41.845	FEZF2-
	52	271	53.528	FEZF2-
	53	279	69.896	FEZF2-
	55	373	90.713	FEZF2-
	56	234	45.402	FEZF2-
	57	385	52.078	FEZF2-
3rd	1	195	40.754	FEZF2-
	2	261	43.337	FEZF2-
	3	258	41.116	FEZF2-
	4	431	49.993	FEZF2-
	5	524	81.553	FEZF2-
	6	173	47.116	FEZF2-
	7	574	77.8	FEZF2-
	8	277	41.975	FEZF2-
	9	289	45.166	FEZF2-
	10	363	46.826	FEZF2-
	11	345	50.878	FEZF2-
	12	386	47.402	FEZF2-
	13	373	54.437	FEZF2-
	14	412	46.403	FEZF2-
	15	416	44.029	FEZF2-
	16	379	44.121	FEZF2-
	17	275	44.982	FEZF2-
	18	663	79.747	FEZF2-
	19	248	45.673	FEZF2-
	20	573	45.981	FEZF2-
	21	209	39.081	FEZF2-
	22	521	53.63	FEZF2-
	23	446	51.143	FEZF2-
	24	269	40.033	FEZF2-
	25	491	58.275	FEZF2-
	26	244	42.803	FEZF2-
	27	224	40.353	FEZF2-
	28	309	57.502	FEZF2-
	29	362	47.986	FEZF2-
	30	323	45.235	FEZF2-
	31	176	39.511	FEZF2-
	32	457	52.595	FEZF2-
	33	274	48.766	FEZF2-
	34	630	49.662	FEZF2-
	35	212	43.453	FEZF2-
	36	293	40.174	FEZF2-
	37	435	62.745	FEZF2-
	38	316	57.519	FEZF2-
	39	474	73.243	FEZF2-
	40	204	44.975	FEZF2-
	41	276	53.764	FEZF2-
	42	235	56.634	FEZF2-
	43	205	45.41	FEZF2-
	44	253	47.862	FEZF2-
	平均	377.286	47.9531
	T-test	0.00996155	0.57894
		Size	Intensity/pixel
		154

## Sheet: Layer5
	4W	5L-6	Layer5
	Size	Intensity/pixel	GFP+		Size	Intensity/pixel	GFP+
	374	33.845	FEZF2-		618	36.56	FEZF2+
	504	55.53	FEZF2-		544	30.485	FEZF2+
	457	60.729	FEZF2-		389	31.851	FEZF2+
	340	50.2	FEZF2-		382	34.029	FEZF2+
	356	34.379	FEZF2-		593	36.998	FEZF2+
	339	66.251	FEZF2-		745	48.264	FEZF2+
	325	34.662	FEZF2-		711	49.052	FEZF2+
	447	36.568	FEZF2-		418	29.402	FEZF2+
	482	83.851	FEZF2-		564	32.516	FEZF2+
	519	53.368	FEZF2-		981	52.726	FEZF2+
	466	56.195	FEZF2-		682	35.089	FEZF2+
	568	87.512	FEZF2-		696	43.171	FEZF2+
	309	59.939	FEZF2-		940	50.076	FEZF2+
	469	39.269	FEZF2-		713	55.957	FEZF2+
	753	31.351	FEZF2-		818	45.517	FEZF2+
	895	101.079	FEZF2-		481	57.148	FEZF2+
	838	92.321	FEZF2-		709	48.357	FEZF2+
	671	100.003	FEZF2-		706	43.462	FEZF2+
	500	89.978	FEZF2-		414	36.053	FEZF2+
	269	91.097	FEZF2-		450	37.733	FEZF2+
	247	38.393	FEZF2-		446	46.908	FEZF2+
	327	88.009	FEZF2-		332	31.53	FEZF2+
	515	108.431	FEZF2-		598	34.199	FEZF2+
	410	74.968	FEZF2-		589	33.577	FEZF2+
	629	43.405	FEZF2-		475	44.642	FEZF2+
	381	97.932	FEZF2-		606	63.345	FEZF2+
	289	83.64	FEZF2-		562	43.336	FEZF2+
	734	64.759	FEZF2-		486	38.537	FEZF2+
	375	127.813	FEZF2-		520	56.817	FEZF2+
	444	109.264	FEZF2-		551	29.535	FEZF2+
	313	91.284	FEZF2-		715	41.284	FEZF2+
	356	39.711	FEZF2-		465	40.703	FEZF2+
	548	71.542	FEZF2-		631	40.431	FEZF2+		Size	Intensity/pixel
	447	57.81	FEZF2-		527	52.52	FEZF2+	平均	GFP only			FEZF2+
	437	58.625	FEZF2-		514	46.519	FEZF2+	1st	506.222	59.8362		591.818	41.7967
	497	52.66	FEZF2-		640	61.513	FEZF2+	2nd	409.897	69.7206		559.28	48.2651
	541	50.571	FEZF2-		307	44.182	FEZF2+	3rd	491.87	67.253		576.158	56.838
	473	54.939	FEZF2-		347	51.79	FEZF2+
	321	43.919	FEZF2-		603	51.997	FEZF2+	T-test	0.0276601	0.0343352
	274	50.843	FEZF2-		411	53.693	FEZF2+
	452	38.454	FEZF2-		267	37.951	FEZF2+
	268	55.948	FEZF2-		303	48.297	FEZF2+
	231	50.104	FEZF2-		354	38.432	FEZF2+
	383	36.065	FEZF2-		502	49.558	FEZF2+
	343	115.717	FEZF2-		568	46.843	FEZF2+
	386	61.632	FEZF2-		871	49.835	FEZF2+
	497	74.384	FEZF2-		519	40.216	FEZF2+
	466	40.028	FEZF2-		433	34.61	FEZF2+
	310	33.774	FEZF2-		909	65.294	FEZF2+
	407	88.6	FEZF2-		892	44.837	FEZF2+
	267	100.558	FEZF2-		466	60.161	FEZF2+
	418	36.041	FEZF2-		869	51.487	FEZF2+
	520	64.075	FEZF2-		309	37.33	FEZF2+
	378	29.302	FEZF2-		416	33.668	FEZF2+
	457	46.667	FEZF2-		643	45.314	FEZF2+
	347	41.968	FEZF2-		873	55.462	FEZF2+
	637	110.13	FEZF2-		714	42.2	FEZF2+
	545	67.499	FEZF2-		725	62.919	FEZF2+
	669	52.74	FEZF2-		698	56.536	FEZF2+
	700	63.673	FEZF2-		403	49.303	FEZF2+
	629	81.409	FEZF2-		283	63.24	FEZF2+
	499	88.246	FEZF2-		595	36.501	FEZF2+
	664	59.839	FEZF2-		514	55.981	FEZF2+
	635	79.863	FEZF2-		248	45.758	FEZF2+
	236	34.424	FEZF2-		538	64.84	FEZF2+
	749	100.908	FEZF2-		722	60.789	FEZF2+
	497	86.64	FEZF2-		549	48.517	FEZF2+
	258	34.109	FEZF2-		441	65.989	FEZF2+
	650	121.898	FEZF2-		535	46.68	FEZF2+
	375	84.429	FEZF2-		305	38.354	FEZF2+
平均	461.6	66.3681			710	57.67	FEZF2+
					844	68.759	FEZF2+
					1072	67.071	FEZF2+
N=	70				491	51.336	FEZF2+
					760	66.737	FEZF2+
					883	70.605	FEZF2+
					356	65.256	FEZF2+
				平均	577.39	47.6083
T-test	7.29223e-05	3.81094e-08
				52.349
				N=	77

## Sheet: Layer6
	4W	5L-6	Layer6
	Size	Intensity/pixel	GFP+			Size	Intensity/pixel	GFP+
	240	32.404	FEZF2-			391	43.877	FEZF2+
	216	64.125	FEZF2-			395	31.881	FEZF2+
	591	55.794	FEZF2-			396	27.73	FEZF2+
	553	31.826	FEZF2-			239	34.243	FEZF2+
	296	41.983	FEZF2-			573	30.112	FEZF2+
	302	27.421	FEZF2-			540	46.119	FEZF2+
	436	34.463	FEZF2-			389	36.581	FEZF2+
	319	38.815	FEZF2-			402	43.204	FEZF2+
	316	35.415	FEZF2-			399	66.779	FEZF2+
	287	60.251	FEZF2-			551	47.154	FEZF2+
	517	82.638	FEZF2-			592	44.375	FEZF2+
	245	28.608	FEZF2-			251	41.096	FEZF2+
	207	56.092	FEZF2-			587	86.642	FEZF2+
	558	59.486	FEZF2-			278	33.112	FEZF2+
	270	45.752	FEZF2-			231	34.342	FEZF2+
	210	37.79	FEZF2-			269	31.476	FEZF2+
	356	45.469	FEZF2-			260	29.838	FEZF2+
	308	63.003	FEZF2-			249	42.566	FEZF2+
	297	50.441	FEZF2-			359	55.287	FEZF2+
	742	81.633	FEZF2-			434	53.629	FEZF2+
	427	69.393	FEZF2-		平均	389.25	43.0022
	594	69.21	FEZF2-
	537	86.834	FEZF2-
	378	33.235	FEZF2-
	292	44.592	FEZF2-		25
	390	62.433	FEZF2-
	258	46.601	FEZF2-
	527	60.423	FEZF2-
	218	42.858	FEZF2-		N=	20
	418	69.105	FEZF2-
	266	27.492	FEZF2-
	319	47.68	FEZF2-
	313	24.524	FEZF2-
	302	46.321	FEZF2-
	356	50.32	FEZF2-
	287	43.993	FEZF2-
	408	43.164	FEZF2-
	405	72.899	FEZF2-
	453	66.002	FEZF2-
	266	67.508	FEZF2-
	253	33.063	FEZF2-
	279	45.161	FEZF2-
	410	63.405	FEZF2-
	280	43.529	FEZF2-
	321	84.134	FEZF2-
	980	94.148	FEZF2-
	258	38.95	FEZF2-
	276	30.982	FEZF2-
	353	32.261	FEZF2-
	244	42.365	FEZF2-
	297	34.178	FEZF2-
	291	32.048	FEZF2-
	252	36.75	FEZF2-
	343	43.583	FEZF2-
	365	64	FEZF2-
	620	73.442	FEZF2-
	366	65.32	FEZF2-
	689	79.136	FEZF2-
	307	76.13	FEZF2-
	462	80.818	FEZF2-
平均	372.1	52.3566
T-test	0.641389	0.0376472
	Size	Intensity/pixel
N=	60
