# Supplementary material for: Scn1a-GFP transgenic mouse revealed Nav1.1 expression in neocortical pyramidal tract projection neurons
Source: eLife. 2023 May 23;12:e87495. doi: 10.7554/eLife.87495 (PMC10205085; doi:10.7554/eLife.87495)
Supplement: Figure 14—figure supplement 1—source data 1. [file elife-87495-fig14-figsupp1-data1.xlsx]

## Sheet: 1R1
P15
1R1			TBR1+	TBR1+/Ank+	AnkG+/Nav1.1+	AnkG+/Nav1.1-	AnkG-/Nav1.1+	AnkG-/Nav1.1-		%AnkG+/TBR1			AnkG+/Nav1.1+	AnkG+/Nav1.1-	AnkG-/Nav1.1+	AnkG-/Nav1.1-		Nav1.1+	Nav1.1-			%Nav1.1+	%Nav1.1-		cells (total)	% TBR+/total	cells(TBR1/Ank+)
Layer2/3		1st	49	22	0	22	0	27		44.898			0	100				0	49			0	100		166	29.5181	22
		2nd	54	31	0	31	0	23		57.4074			0	100				0	54			0	100		200	27	31
		3rd	58	37	0	37	0	21		63.7931			0	100				0	58			0	100		146	39.726	37
										55.3662		Ave.	0	100							Ave.	0	100		512	32.0814	90
			TBR1-	TBR1-/Ank+																					cells (total)	% TBR-/total
		1st	117	51	8	43	0	66					15.6863	84.3137				8	109			6.83761	93.1624		166	70.4819	51
		2nd	146	91	5	86	0	56					5.49451	94.5055				5	142			3.42466	97.2603		200	73	91
		3rd	88	34	2	32	0	54					5.88235	94.1176				2	86			2.27273	97.7273		146	60.274	34
												Ave.	9.02104	90.979							Ave.	4.17833	96.05		512	67.9186	176
				TBR1+/Ank+																					cells (total)	% TBR+/total
Layer5		1st	47	20	0	20	0	27		42.5532			0	100				0	47			0	100		177	26.5537	20
		2nd	70	37	0	37	0	33		52.8571			0	100				0	70			0	100		196	35.7143	37
		3rd	76	42	0	42	0	34		55.2632			0	100				0	76			0	100		198	38.3838	42
										50.2245		Ave.	0	100							Ave.	0	100		571	33.5506	99
				TBR1-/Ank+																					cells (total)	% TBR-/total
		1st	130	45	12	33	0	85					26.6667	73.3333				12	118			9.23077	90.7692		177	73.4463	45
		2nd	126	29	5	24	2	95					17.2414	82.7586				7	119			5.55556	94.4444		196	64.2857	29
		3rd	122	18	4	14	2	102					22.2222	77.7778				6	116			4.91803	95.082		198	61.6162	18
												Ave.	22.0434	77.9566							Ave.	6.56812	93.4319		571	66.4494	92
				TBR1+/Ank+																					cells (total)	% TBR+/total
Layer6		1st	110	42	0	42	0	68		38.1818			0	100				0	110			0	100		211	52.1327	42
		2nd	139	48	0	48	0	91		34.5324			0	100				0	139			0	100		240	57.9167	48
		3rd	131	41	0	41	0	90		31.2977			0	100				0	131			0	100		237	55.2743	41
										34.6706		Ave.	0	100							Ave.	0	100		688	55.1079	131
				TBR1-/Ank+																					cells (total)	% TBR-/total
		1st	101	39	0	39	0	59					0	100				0	98			0	97.0297		211	47.8673	39
		2nd	101	26	1	25	0	75					3.84615	96.1538				1	100			0.990099	99.0099		240	42.0833	26
		3rd	106	23	3	20	1	82					13.0435	86.9565				4	102			3.77358	96.2264		237	44.7257	23
												Ave.	5.62988	94.3701							Ave.	1.58789	97.422		688	44.8921	88
			P15											%						AnkG+						AnkG+
			1R1		Nav1.1+,TBR1-	Nav1.1+,TBR1+	Nav1.1-,TBR1-	Nav1.1-,TBR1+	toatl					Nav1.1+,TBR1-	Nav1.1+,TBR1+	Nav1.1-,TBR1-	Nav1.1-,TBR1+			Nav1.1+	TBR1+	TBR1-	%TBR1+/Nav1.1			TBR1+	Nav1.1+	Nav1.1-	%Nav1.2+/TBR1+
			Layer2/3	1st	8	0	43	22	73				Layer2/3	10.9589	0	58.9041	30.137		Layer2/3	1st	0	8	0			22	0	22	0
				2nd	5	0	86	31	122					4.09836	0	70.4918	25.4098			2nd	0	5	0			31	0	31	0
				3rd	2	0	32	37	71					2.8169	0	45.0704	52.1127			3rd	0	2	0			37	0	37	0
									266				Ave.	5.95806	0	58.1554	35.8865					15						90
			Layer5	1st	12	0	33	20	65				Layer5	18.4615	0	50.7692	30.7692		Layer5	1st	0	12	0			20	0	20	0
				2nd	5	0	24	37	66					7.57576	0	36.3636	56.0606			2nd	0	5	0			37	0	37	0
				3rd	4	0	14	42	60					6.66667	0	23.3333	70			3rd	0	4	0			42	0	42	0
									191				Ave.	10.9013	0	36.8221	52.2766					21						99
			Layer6	1st	0	0	39	42	81				Layer6	0	0	48.1481	51.8519		Layer6	1st	0	0	0			42	0	42	0
				2nd	1	0	25	48	74					1.35135	0	33.7838	64.8649			2nd	0	1	0			48	0	48	0
				3rd	3	0	20	41	64					4.6875	0	31.25	64.0625			3rd	0	3	0			41	0	41	0
									219				Ave.	2.01295	0	37.7273	60.2597					4						131
				cell Num.	40	0	316	320	676
																			cell Num.		0	40	0						0
				P15	%
				1R1	Nav1.1+,TBR1-	Nav1.1+,TBR1+	Nav1.1-,TBR1-	Nav1.1-,TBR1+
				Layer2/3	5.95806	0	58.1554	35.8865
				Layer5	10.9013	0	36.8221	52.2766
				Layer6	2.01295	0	37.7273	60.2597

## Sheet: 4R1
P15
1R1			TBR1+	TBR1+/Ank+	AnkG+/Nav1.1+	AnkG+/Nav1.1-	AnkG-/Nav1.1+	AnkG-/Nav1.1-		%AnkG+/TBR1			AnkG+/Nav1.1+	AnkG+/Nav1.1-	AnkG-/Nav1.1+	AnkG-/Nav1.1-		Nav1.1+	Nav1.1-			%Nav1.1+	%Nav1.1-		cells (total)	% TBR+/total	cells(TBR1/Ank+)
Layer2/3		1st	52	33	0	33	0	19		63.4615			0	100				0	52			0	100		207	25.1208	33
		2nd	54	30	0	30	0	24		55.5556			0	100				0	54			0	100		184	29.3478	30
		3rd	41	25	0	25	0	16		60.9756			0	100				0	41			0	100		192	21.3542	25
										59.9976		Ave.	0	100							Ave.	0	100		583	25.2743	88
			TBR1-	TBR1-/Ank+																					cells (total)	% TBR-/total
		1st	155	45	8	37	0	110					17.7778	82.2222				8	147			5.16129	94.8387		207	74.8792	45
		2nd	130	61	4	57	0	69					6.55738	93.4426				4	126			3.07692	96.9231		184	70.6522	61
		3rd	151	69	9	60	2	80					13.0435	86.9565				11	140			7.28477	92.7152		192	78.6458	69
												Ave.	12.4595	87.5405							Ave.	5.17433	94.8257		583	74.7257	175
			TBR1+	TBR1+/Ank+																					cells (total)	% TBR+/total
Layer5		1st	79	39	0	39	0	40		49.3671			0	100				0	79			0	100		175	45.1429	39
		2nd	64	37	0	37	0	27		57.8125			0	100				0	64			0	100		197	32.4873	37
		3rd	71	35	0	35	0	36		49.2958			0	100				0	71			0	100		188	37.766	35
										52.1585		Ave.	0	100							Ave.	0	100		560	38.4654	111
			TBR1-	TBR1-/Ank+																					cells (total)	% TBR-/total
		1st	96	29	7	22	5	62					24.1379	75.8621				12	84			12.5	87.5		175	54.8571	29
		2nd	133	31	8	23	6	97					25.8065	74.1935				14	120			10.5263	90.2256		197	67.5127	31
		3rd	117	34	9	25	2	81					26.4706	73.5294				11	106			9.40171	90.5983		188	62.234	34
												Ave.	25.4717	74.5283							Ave.	10.8093	89.4413		560	61.5346	94
			TBR1+	TBR1+/Ank+																					cells (total)	% TBR+/total
Layer6		1st	117	52	0	52	0	65		44.4444			0	100				0	117			0	100		211	55.4502	52
		2nd	89	45	0	45	1	43		50.5618			0	100				1	88			1.1236	98.8764		239	37.2385	45
		3rd	152	61	0	61	0	91		40.1316			0	100				0	152			0	100		282	53.9007	61
										45.0459		Ave.	0	100							Ave.	0.374532	99.6255		732	48.8631	158
			TBR1-	TBR1-/Ank+																					cells (total)	% TBR-/total
		1st	94	31	1	30	6	57					3.22581	96.7742				7	87			7.44681	92.5532		211	44.5498	31
		2nd	150	32	3	29	4	114					9.375	90.625				7	143			4.66667	95.3333		239	62.7615	32
		3rd	130	36	8	28	3	91					22.2222	77.7778				11	119			8.46154	91.5385		282	46.0993	36
												Ave.	11.6077	88.3923							Ave.	6.85834	93.1417		732	51.1369	99
			P15											%						AnkG+						AnkG+
			4R1		Nav1.1+,TBR1-	Nav1.1+,TBR1+	Nav1.1-,TBR1-	Nav1.1-,TBR1+	toatl					Nav1.1+,TBR1-	Nav1.1+,TBR1+	Nav1.1-,TBR1-	Nav1.1-,TBR1+			Nav1.1+	TBR1+	TBR1-	%TBR1+/Nav1.1			TBR1+	Nav1.1+	Nav1.1-	%Nav1.2+/TBR1+
			Layer2/3	1st	8	0	37	33	78					10.2564	0	47.4359	42.3077		Layer2/3	1st	0	8	0			33	0	33	0
				2nd	4	0	57	30	91					4.3956	0	62.6374	32.967			2nd	0	4	0			30	0	30	0
				3rd	9	0	60	25	94					9.57447	0	63.8298	26.5957			3rd	0	9	0			25	0	25	0
									263					8.07549	0	57.9677	33.9568					21						88
			Layer5	1st	7	0	22	39	68					10.2941	0	32.3529	57.3529		Layer5	1st	0	7	0			39	0	39	0
				2nd	8	0	23	37	68					11.7647	0	33.8235	54.4118			2nd	0	8	0			37	0	37	0
				3rd	9	0	25	35	69					13.0435	0	36.2319	50.7246			3rd	0	9	0			35	0	35	0
									205					11.7008	0	34.1361	54.1631					24						111
			Layer6	1st	1	0	30	52	83					1.20482	0	36.1446	62.6506		Layer6	1st	0	1	0			52	0	52	0
				2nd	3	0	29	45	77					3.8961	0	37.6623	58.4416			2nd	0	3	0			45	0	45	0
				3rd	8	0	28	61	97					8.24742	0	28.866	62.8866			3rd	0	8	0			61	0	61	0
									257					4.44945	0	34.2243	61.3263					12						158
				cell Num.	57	0	311	357	725
																			cell Num.		0	57	0						0
				P15	%
				4R1	Nav1.1+,TBR1-	Nav1.1+,TBR1+	Nav1.1-,TBR1-	Nav1.1-,TBR1+
				Layer2/3	8.07549	0	57.9677	33.9568
				Layer5	11.7008	0	34.1361	54.1631
				Layer6	4.44945	0	34.2243	61.3263

## Sheet: 6R
P15
6R			TBR1+	TBR1+/Ank+	AnkG+/Nav1.1+	AnkG+/Nav1.1-	AnkG-/Nav1.1+	AnkG-/Nav1.1-		%AnkG+/TBR1			AnkG+/Nav1.1+	AnkG+/Nav1.1-	AnkG-/Nav1.1+	AnkG-/Nav1.1-		Nav1.1+	Nav1.1-			%Nav1.1+	%Nav1.1-		cells (total)	% TBR+/total	cells(TBR1/Ank+)
Layer2/3		1st	73	42	0	42	0	31		57.5342			0	100				0	73			0	100		300	24.3333	22
		2nd	51	32	0	32	0	19		62.7451			0	100				0	51			0	100		301	16.9435	31
		3rd	64	44	0	44	0	20		68.75			0	100				0	64			0	100		246	26.0163	37
										63.0098		Ave.	0	100							Ave.	0	100	合計	847	22.431	90
			TBR1-	TBR1-/Ank+																					cells (total)	% TBR-/total
		1st	227	88	6	82	9	130					6.81818	93.1818				15	212			6.60793	93.3921		300	75.6667	51
		2nd	250	77	9	68	8	165					11.6883	88.3117				17	233			6.8	93.2		301	83.0565	91
		3rd	182	67	8	59	1	114					11.9403	88.0597				9	173			4.94505	95.0549		246	73.9837	34
												Ave.	10.1489	89.8511							Ave.	6.11766	93.8823	合計	847	77.569	176
			TBR1+	TBR1+/Ank+																					cells (total)	% TBR+/total
Layer5		1st	84	37	0	37	0	47		44.0476			0	100				0	84			0	100		211	39.8104	20
		2nd	63	36	0	36	0	27		57.1429			0	100				0	63			0	100		220	28.6364	37
		3rd	69	36	0	36	0	33		52.1739			0	100				0	69			0	100		194	35.567	42
										51.1215		Ave.	0	100							Ave.	0	100	合計	625	34.6713	99
			TBR1-	TBR1-/Ank+																					cells (total)	% TBR-/total
		1st	127	24	4	20	9	94					16.6667	83.3333				13	114			10.2362	89.7638		211	60.1896	45
		2nd	157	58	9	49	8	91					15.5172	84.4828				17	140			10.828	89.172		220	71.3636	29
		3rd	125	27	5	22	6	92					18.5185	81.4815				11	114			8.8	91.2		194	64.433	18
												Ave.	16.9008	83.0992							Ave.	9.95475	90.0453	合計	625	65.3287	92
			TBR1+	TBR1+/Ank+																					cells (total)	% TBR+/total
Layer6		1st	160	87	0	87	0	73		54.375			0	100				0	160			0	100		298	53.6913	42
		2nd	173	86	0	86	1	86		49.711			0	100				1	172			0.578035	99.422		305	56.7213	48
		3rd	163	90	0	90	0	73		55.2147			0	100				0	163			0	100		284	57.3944	41
										53.1002		Ave.	0	100							Ave.	0.192678	99.8073	合計	887	55.9357	131
			TBR1-	TBR1-/Ank+																					cells (total)	% TBR-/total
		1st	138	25	4	21	4	109					16	84				8	130			5.7971	94.2029		298	46.3087	39
		2nd	132	28	3	25	7	97					10.7143	89.2857				10	122			7.57576	92.4242		305	43.2787	26
		3rd	121	24	5	19	5	92					20.8333	79.1667				10	111			8.26446	91.7355		284	42.6056	23
												Ave.	15.8492	84.1508							Ave.	7.21244	92.7876	合計	887	44.0643	88
			P15											%						AnkG+						AnkG+
			6R		Nav1.1+,TBR1-	Nav1.1+,TBR1+	Nav1.1-,TBR1-	Nav1.1-,TBR1+	toatl					Nav1.1+,TBR1-	Nav1.1+,TBR1+	Nav1.1-,TBR1-	Nav1.1-,TBR1+			Nav1.1+	TBR1+	TBR1-	%TBR1+/Nav1.1			TBR1+	Nav1.1+	Nav1.1-	%Nav1.2+/TBR1+
			Layer2/3	1st	6	0	82	42	130					4.61538	0	63.0769	32.3077		Layer2/3	1st	0	6	0			42	0	42	0
				2nd	9	0	68	32	109					8.25688	0	62.3853	29.3578			2nd	0	9	0			32	0	32	0
				3rd	8	0	59	44	111					7.20721	0	53.1532	39.6396			3rd	0	8	0			44	0	44	0
									350					6.69316	0	59.5385	33.7684					23						118
			Layer5	1st	4	0	20	37	61					6.55738	0	32.7869	60.6557		Layer5	1st	0	4	0			37	0	37	0
				2nd	9	0	49	36	94					9.57447	0	52.1277	38.2979			2nd	0	9	0			36	0	36	0
				3rd	5	0	22	36	63					7.93651	0	34.9206	57.1429			3rd	0	5	0			36	0	36	0
									218					8.02278	0	39.9451	52.0322					18						109
			Layer6	1st	4	0	21	87	112					3.57143	0	18.75	77.6786		Layer6	1st	0	4	0			87	0	87	0
				2nd	3	0	25	86	114					2.63158	0	21.9298	75.4386			2nd	0	3	0			86	0	86	0
				3rd	5	0	19	90	114					4.38596	0	16.6667	78.9474			3rd	0	5	0			90	0	90	0
									340					3.52966	0	19.1155	77.3548					12						263
				cell Num.	53	0	365	490	908
																			cell Num.		0	53	0						0
				P15	%
				6R	Nav1.1+,TBR1-	Nav1.1+,TBR1+	Nav1.1-,TBR1-	Nav1.1-,TBR1+
				Layer2/3	6.69316	0	59.5385	33.7684
				Layer5	8.02278	0	39.9451	52.0322
				Layer6	3.52966	0	19.1155	77.3548

## Sheet: Total
P15		%					N=					AnkG			AnkG							AnkG
1R1		Nav1.1+,TBR1-	Nav1.1+,TBR1+	Nav1.1-,TBR1-	Nav1.1-,TBR1+		cells					Nav1.1+, TBR1+/-			TBR1+, Nav1.1+/-				Nav1.1-, TBR1+/-			TBR1-, Nav1.1+/-
Layer2/3	1R1	5.95806	0	58.1554	35.8865		266			Layer2/3	1R1	5.95806			35.8865				94.0419			64.1135
	4R1	8.07549	0	57.9677	33.9568		263				4R1	8.07549			33.9568				91.9245			66.0432
	6R	6.69316	0	59.5385	33.7684		350	879			6R	6.69316			33.7684				93.3068			66.2316
	ave.	6.9089	0	58.5539	34.5372						ave.	6.9089			34.5372			ave.	93.0911			65.4628
	SD	1.07508	0	0.857842	1.17229						SD	1.07508			1.17229			SD	1.07508			1.17229
	SEM	0.620698	0	0.495276	0.676823						SEM	0.620698			0.676823			SEM	0.620698			0.676823
Layer5	1R1	10.9013	0	36.8221	52.2766		191			Layer5	1R1	10.9013			52.2766				89.0987			47.7234
	4R1	11.7008	0	34.1361	54.1631		205				4R1	11.7008			54.1631				88.2992			45.8369
	6R	8.02278	0	39.9451	52.0322		218	614			6R	8.02278			52.0322				91.9772			47.9678
	ave.	10.2083	0	36.9677	52.824						ave.	10.2083			52.824			ave.	89.7917			47.176
	SD	1.93445	0	2.90721	1.16616						SD	1.93445			1.16616			SD	1.93445			1.16616
	SEM	1.11686	0	1.67848	0.673285						SEM	1.11686			0.673285			SEM	1.11686			0.673285
Layer6	1R1	2.01295	0	37.7273	60.2597		219			Layer6	1R1	2.01295			60.2597				97.987			39.7403
	4R1	4.44945	0	34.2243	61.3263		257				4R1	4.44945			61.3263				95.5506			38.6737
	6R	3.52966	0	19.1155	77.3548		340	816			6R	3.52966			77.3548				96.4703			22.6452
	ave.	3.33069	0	30.3557	66.3136						ave.	3.33069			66.3136			ave.	96.6693			33.6864
	SD	1.23038	0	9.89062	9.57685						SD	1.23038			9.57685			SD	1.23038			9.57685
	SEM	0.710357	0	5.71035	5.52919						SEM	0.710357			5.52919			SEM	0.710357			5.52919
	%	Nav1.1+,TBR1+	Nav1.1+,TBR1-	Nav1.1-,TBR1+	Nav1.1-,TBR1-
	L2/3	0	6.9089	34.5372	58.5539
	L5	0	10.2083	52.824	36.9677
	L6	0	3.33069	66.3136	30.3557
	SEM
	L2/3	0	0.620698	0.676823	0.495276
	L5	0	1.11686	0.673285	1.67848
	L6	0	0.710357	5.52919	5.71035
	Supplementary figure S11-left
	%	Nav1.1+,TBR1+	Nav1.1-,TBR1+	Nav1.1+,TBR1-	Nav1.1-,TBR1-
	L2/3	0	34.5372	6.9089	58.5539
	L5	0	52.824	10.2083	36.9677
	L6	0	66.3136	3.33069	30.3557
	SEM
	L2/3	0	0.676823	0.620698	0.495276
	L5	0	0.673285	1.11686	1.67848
	L6	0	5.52919	0.710357	5.71035

## Sheet: in_TBR1,in_1A
	1R1	1R1	4R1	4R1	6R	6R										Cell Num. (TBR1+/Ank+)
L2/3 (% /TBR1+)	AnkG+/Nav1.1+	AnkG+/Nav1.1-												L2/3 (% /TBR1+)		1R1	4R1	6R
1st	0	100	0	100	0	100									1st	22	33	22
2nd	0	100	0	100	0	100									2nd	31	30	31
3rd	0	100	0	100	0	100									3rd	37	25	37
Ave.	0	100	0	100	0	100									Ave.	90	88	90	268
L2/3 (% /TBR1-)														L2/3 (% /TBR1-)
1st	15.6863	84.3137	17.7778	82.2222	6.81818	93.1818									1st	51	45	51
2nd	5.49451	94.5055	6.55738	93.4426	11.6883	88.3117									2nd	91	61	91
3rd	5.88235	94.1176	13.0435	86.9565	11.9403	88.0597									3rd	34	69	34
Ave.	9.02104	90.979	12.4595	87.5405	10.1489	89.8511									Ave.	176	175	176	527
L5 (% /TBR1+)														L2/3 (% /TBR1+)
1st	0	100	0	100	0	100									1st	20	39	20
2nd	0	100	0	100	0	100									2nd	37	37	37
3rd	0	100	0	100	0	100									3rd	42	35	42
Ave.	0	100	0	100	0	100									Ave.	99	111	99	309
L5 (% /TBR1-)														L2/3 (% /TBR1-)
1st	26.6667	73.3333	24.1379	75.8621	16.6667	83.3333									1st	45	29	45
2nd	17.2414	82.7586	25.8065	74.1935	15.5172	84.4828									2nd	29	31	29
3rd	22.2222	77.7778	26.4706	73.5294	18.5185	81.4815									3rd	18	34	18
Ave.	22.0434	77.9566	25.4717	74.5283	16.9008	83.0992									Ave.	92	94	92	278
L6 (% /TBR1+)														L2/3 (% /TBR1+)
1st	0	100	0	100	0	100									1st	42	52	42
2nd	0	100	0	100	0	100									2nd	48	45	48
3rd	0	100	0	100	0	100									3rd	41	61	41
Ave.	0	100	0	100	0	100									Ave.	131	158	131	420
L6 (% /TBR1-)														L2/3 (% /TBR1-)
1st	0	100	3.22581	96.7742	16	84									1st	39	31	39
2nd	3.84615	96.1538	9.375	90.625	10.7143	89.2857									2nd	26	32	26
3rd	13.0435	86.9565	22.2222	77.7778	20.8333	79.1667									3rd	23	36	23
Ave.	5.62988	94.3701	11.6077	88.3923	15.8492	84.1508									Ave.	88	99	88	275
												Supplementary figure S11-right
													TBR1+			TBR1-
													Nav1.1+/TBR1	Nav1.1-/TBR1		AnkG+/Nav1.1+	AnkG+/Nav1.1-						Cells	N=				Cells	N=
L2/3 (% /TBR1+)	AnkG+/Nav1.1+	AnkG+/Nav1.1-	-1			L2/3 (% /TBR1-)	AnkG+/Nav1.1+	AnkG+/Nav1.1-	-1			L2/3	0	100		10.5432	89.4568							AnkG+	Nav1.1+				AnkG+	TBR1+
1R1	0	100				1R1	9.02104	90.979				L5	0	100		21.472	78.528							TBR1+	TBR1-				TBR1+	TBR1-
4R1	0	100				4R1	12.4595	87.5405				L6	0	100		11.0289	88.9711					L2/3	1	0	15		L2/3	1	0	90
6R	0	100				6R	10.1489	89.8511															2	0	21			2	0	88
Ave.	0	100	0			% 平均	10.5432	89.4568	0														3	0	23			3	0	118
SD	0	0					1.75282	1.75282																	59					296
N=3
SEM	0	0					1.01199	1.01199
																						L5	1	0	21		L5	1	0	99
L5 (% /TBR1+)			-1			L2/3 (% /TBR1-)																	2	0	24			2	0	111
1R1	0	100				1R1	22.0434	77.9566															3	0	18			3	0	109
4R1	0	100				4R1	25.4717	74.5283																	63					319
6R	0	100				6R	16.9008	83.0992
Ave.	0	100	0			% 平均	21.472	78.528	0
SD	0	0					4.31391	4.31391
N=3																						L6	1	0	4		L6	1	0	131
SEM	0	0					2.49063	2.49063															2	0	12			2	0	158
																							3	0	12			3	0	263
																									28					552
L6 (% /TBR1+)			-1			L2/3 (% /TBR1-)
1R1	0	100				1R1	5.62988	94.3701																	150					1167
4R1	0	100				4R1	11.6077	88.3923				Supplementary figure S11-middle
6R	0	100				6R	15.8492	84.1508					Nav1.1+
Ave.	0	100	0			% 平均	11.0289	88.9711	0				TBR1+/Nav1.1	TBR1-/Nav1.1
SD	0	0					5.13419	5.13419				L2/3	0	100
N=3												L5	0	100
SEM	0	0					2.96423	2.96423				L6	0	100
