# Supplementary material for: Scn1a-GFP transgenic mouse revealed Nav1.1 expression in neocortical pyramidal tract projection neurons
Source: eLife. 2023 May 23;12:e87495. doi: 10.7554/eLife.87495 (PMC10205085; doi:10.7554/eLife.87495)
Supplement: Figure 14—figure supplement 2—source data 1. [file elife-87495-fig14-figsupp2-data1.xlsx]

## Sheet: 1R1
P15																							cells				%
1R1			TBR1+	AnkG+/Nav1.2+	AnkG+/Nav1.2-	AnkG-		%Nav1.2/TBR1+	%AnkG+/TBR1+		Nav1.2+	Nav1.2+/AnkG+	Nav1.2+/AnkG+/TBR1+	TBR1-	%TBR1/Nav1.2				Nav1.2+,TBR1-	Nav1.2+,TBR1+	Nav1.2-,TBR1-	Nav1.2-,TBR1+	toatl				Nav1.2+,TBR1-	Nav1.2+,TBR1+	Nav1.2-,TBR1-	Nav1.2-,TBR1+
Layer2/3		1st	62	22	19	21		53.6585	66.129		1st	68	22	46	32.3529				46	22	4	19	91				50.5495	24.1758	4.3956	20.8791
		2nd	58	32	11	15		74.4186	74.1379		2nd	89	32	57	35.9551				57	32	4	11	104				54.8077	30.7692	3.84615	10.5769
		3rd	65	26	18	21		59.0909	67.6923		3rd	72	26	46	36.1111				46	26	10	18	100				46	26	10	18
		SUM	185	80	48		Ave.	62.3894	69.3198			229	80	Ave.	34.8064								295				50.4524	26.9817	6.08059	16.4853
																							cells				%
			TBR1+	AnkG+/Nav1.2+	AnkG+/Nav1.2-	AnkG-		%Nav1.2/TBR1+	%AnkG+/TBR1+		Nav1.2+	Nav1.2+/AnkG+	Nav1.2+/AnkG+/TBR1+	TBR1-	%TBR1/Nav1.2				Nav1.2+,TBR1-	Nav1.2+,TBR1+	Nav1.2-,TBR1-	Nav1.2-,TBR1+	toatl				Nav1.2+,TBR1-	Nav1.2+,TBR1+	Nav1.2-,TBR1-	Nav1.2-,TBR1+
Layer5		1st	57	26	8	23		76.4706	59.6491		1st	54	26	28	48.1481				28	26	10	8	72				38.8889	36.1111	13.8889	11.1111
		2nd	60	25	12	23		67.5676	61.6667		2nd	44	25	19	56.8182				19	25	10	12	66				28.7879	37.8788	15.1515	18.1818
		3rd	70	28	14	28		66.6667	60		3rd	47	28	19	59.5745				19	28	11	14	72				26.3889	38.8889	15.2778	19.4444
			187	79	34		Ave.	70.2349	60.4386			145	79	Ave.	54.8469								210				31.3552	37.6263	14.7727	16.2458
																							cells				%
			TBR1+	AnkG+/Nav1.2+	AnkG+/Nav1.2-	AnkG-		%Nav1.2/TBR1+	%AnkG+/TBR1+		Nav1.2+	Nav1.2+/AnkG+	Nav1.2+/AnkG+/TBR1+	TBR1-	%TBR1/Nav1.2				Nav1.2+,TBR1-	Nav1.2+,TBR1+	Nav1.2-,TBR1-	Nav1.2-,TBR1+	toatl				Nav1.2+,TBR1-	Nav1.2+,TBR1+	Nav1.2-,TBR1-	Nav1.2-,TBR1+
Layer6		1st	108	42	14	52		75	51.8519		1st	61	42	19	68.8525				19	42	11	14	86				22.093	48.8372	12.7907	16.2791
		2nd	140	41	31	68		56.9444	51.4286		2nd	67	41	26	61.194				26	41	6	31	104				25	39.4231	5.76923	29.8077
		3rd	128	40	37	51		51.9481	60.1562		3rd	63	40	23	63.4921				23	40	11	37	111				20.7207	36.036	9.90991	33.3333
			376	123	82		Ave.	61.2975	54.4789			191	123	Ave.	64.5129								301				22.6046	41.4321	9.48995	26.4734
				%Nav1.2/TBR1								%TBR1/Nav1.2
				1	2	3	Ave.					1	2	3	Ave.
			L2/3	53.6585	74.4186	59.0909	62.3894				L2/3	32.3529	35.9551	36.1111	34.8064
			L5	76.4706	67.5676	66.6667	70.2349				L5	48.1481	56.8182	59.5745	54.8469
			L6	75	56.9444	51.9481	61.2975				L6	68.8525	61.194	63.4921	64.5129
				%AnkG+/TBR1
				1	2	3	Ave.		cells
			L2/3	66.129	74.1379	67.6923	69.3198		185
			L5	59.6491	61.6667	60	60.4386		187
			L6	51.8519	51.4286	60.1562	54.4789		376

## Sheet: 4R1
P15																										%
4R1			TBR1+	AnkG+/Nav1.2+	AnkG+/Nav1.2-	AnkG-		%Nav1.2/TBR1	%AnkG+/TBR1	Nav1.2+	Nav1.2+/AnkG+	Nav1.2+/AnkG+/TBR1+	TBR1-	%TBR1/Nav1.2				Nav1.2+,TBR1-	Nav1.2+,TBR1+	Nav1.2-,TBR1-	Nav1.2-,TBR1+	toatl				Nav1.2+,TBR1-	Nav1.2+,TBR1+	Nav1.2-,TBR1-	Nav1.2-,TBR1+
Layer2/3		1st	28	13	5	10		72.2222	64.2857		63	13	50	20.6349				50	13	8	5	76				65.7895	17.1053	10.5263	6.57895
		2nd	40	20	7	13		74.0741	67.5		69	20	49	28.9855				49	20	8	7	84				58.3333	23.8095	9.52381	8.33333
		3rd	51	23	11	17		67.6471	66.6667		87	23	64	26.4368				64	23	14	11	112				57.1429	20.5357	12.5	9.82143
			119	56	23		Ave.	71.3145	66.1508		219	56	Ave.	25.3524								272				60.4219	20.4835	10.85	8.24457
																										%
			TBR1+	AnkG+/Nav1.2+	AnkG+/Nav1.2-	AnkG-		%Nav1.2/TBR1	%AnkG+/TBR1	Nav1.2+	Nav1.2+/AnkG+	Nav1.2+/AnkG+/TBR1+	TBR1-	%TBR1/Nav1.2				Nav1.2+,TBR1-	Nav1.2+,TBR1+	Nav1.2-,TBR1-	Nav1.2-,TBR1+	toatl				Nav1.2+,TBR1-	Nav1.2+,TBR1+	Nav1.2-,TBR1-	Nav1.2-,TBR1+
Layer5		1st	49	13	5	31		72.2222	36.7347		27	13	14	48.1481				14	13	10	5	42				33.3333	30.9524	23.8095	11.9048
		2nd	61	18	7	36		72	40.9836		32	18	14	56.25				14	18	10	7	49				28.5714	36.7347	20.4082	14.2857
		3rd	65	23	8	34		74.1935	47.6923		41	23	18	56.0976				18	23	17	8	66				27.2727	34.8485	25.7576	12.1212
			175	54	20		Ave.	72.8053	41.8035		100	54	Ave.	53.4986								157				29.7258	34.1785	23.3251	12.7706
																										%
			TBR1+	AnkG+/Nav1.2+	AnkG+/Nav1.2-	AnkG-		%Nav1.2/TBR1	%AnkG+/TBR1	Nav1.2+	Nav1.2+/AnkG+	Nav1.2+/AnkG+/TBR1+	TBR1-	%TBR1/Nav1.2				Nav1.2+,TBR1-	Nav1.2+,TBR1+	Nav1.2-,TBR1-	Nav1.2-,TBR1+	toatl				Nav1.2+,TBR1-	Nav1.2+,TBR1+	Nav1.2-,TBR1-	Nav1.2-,TBR1+
Layer6		1st	88	31	14	43		68.8889	51.1364		40	31	9	77.5				9	31	14	14	68				13.2353	45.5882	20.5882	20.5882
		2nd	110	35	20	55		63.6364	50		50	35	15	70				15	35	9	20	79				18.9873	44.3038	11.3924	25.3165
		3rd	109	31	8	70		79.4872	35.7798		52	31	21	59.6154				21	31	9	8	69				30.4348	44.9275	13.0435	11.5942
			307	97	42		Ave.	70.6708	45.6387		142	97	Ave.	69.0385								216				20.8858	44.9399	15.008	19.1663
				%Nav1.2/TBR1							%TBR1/Nav1.2
				1	2	3	Ave.				1	2	3	Ave.
			L2/3	72.2222	74.0741	67.6471	71.3145			L2/3	20.6349	28.9855	26.4368	25.3524
			L5	72.2222	72	74.1935	72.8053			L5	48.1481	56.25	56.0976	53.4986
			L6	68.8889	63.6364	79.4872	70.6708			L6	77.5	70	59.6154	69.0385
				%AnkG+/TBR1
				1	2	3	Ave.		cells
			L2/3	64.2857	67.5	66.6667	66.1508		119
			L5	36.7347	40.9836	47.6923	41.8035		175
			L6	51.1364	50	35.7798	45.6387		307

## Sheet: 6R
P15																										%
6R			TBR1+	AnkG+/Nav1.2+	AnkG+/Nav1.2-	AnkG-		%Nav1.2/TBR1	%AnkG+/TBR1	Nav1.2+	Nav1.2+,AnkG+	Nav1.2+,AnkG+/TBR1+	TBR1-	%TBR1/Nav1.2				Nav1.2+,TBR1-	Nav1.2+,TBR1+	Nav1.2-,TBR1-	Nav1.2-,TBR1+	toatl				Nav1.2+,TBR1-	Nav1.2+,TBR1+	Nav1.2-,TBR1-	Nav1.2-,TBR1+
Layer2/3		1st	70	24	12	34		66.6667	51.4286		80	24	56	30				56	24	14	12	106				52.8302	22.6415	13.2075	11.3208
		2nd	57	21	7	29		75	49.1228		111	21	90	18.9189				90	21	12	7	130				69.2308	16.1538	9.23077	5.38462
		3rd	78	37	9	32		80.4348	58.9744		138	37	101	26.8116				101	37	17	9	164				61.5854	22.561	10.3659	5.4878
			205	82	28		Ave.	74.0338	53.1752		329	82	Ave.	25.2435								400				61.2154	20.4521	10.9347	7.39772
																										%
			TBR1+	AnkG+/Nav1.2+	AnkG+/Nav1.2-	AnkG-		%Nav1.2/TBR1	%AnkG+/TBR1	Nav1.2+	Nav1.2+,AnkG+	Nav1.2+,AnkG+/TBR1+	TBR1-	%TBR1/Nav1.2				Nav1.2+,TBR1-	Nav1.2+,TBR1+	Nav1.2-,TBR1-	Nav1.2-,TBR1+	toatl				Nav1.2+,TBR1-	Nav1.2+,TBR1+	Nav1.2-,TBR1-	Nav1.2-,TBR1+
Layer5		1st	62	14	16	32		46.6667	48.3871		54	31	23	57.4074				23	31	16	16	86				26.7442	36.0465	18.6047	18.6047
		2nd	92	32	16	44		66.6667	52.1739		62	32	30	51.6129				30	32	31	16	109				27.5229	29.3578	28.4404	14.6789
		3rd	66	32	9	25		78.0488	62.1212		78	32	46	41.0256				46	32	18	9	105				43.8095	30.4762	17.1429	8.57143
			220	78	41		Ave.	63.794	54.2274		194	95	Ave.	50.0153								300				32.6922	31.9602	21.396	13.9517
																										%
			TBR1+	AnkG+/Nav1.2+	AnkG+/Nav1.2-	AnkG-		%Nav1.2/TBR1	%AnkG+/TBR1	Nav1.2+	Nav1.2+,AnkG+	Nav1.2+,AnkG+/TBR1+	TBR1-	%TBR1/Nav1.2				Nav1.2+,TBR1-	Nav1.2+,TBR1+	Nav1.2-,TBR1-	Nav1.2-,TBR1+	toatl				Nav1.2+,TBR1-	Nav1.2+,TBR1+	Nav1.2-,TBR1-	Nav1.2-,TBR1+
Layer6		1st		NA	NA	NA					NA	NA	NA					NA	NA	NA	NA	0
		2nd	186	67	39	80		63.2075	56.9892		118	67	51	56.7797				51	67	14	39	171				29.8246	39.1813	8.18713	22.807
		3rd	129	62	11	56		84.9315	56.5891		123	62	61	50.4065				61	62	11	11	145				42.069	42.7586	7.58621	7.58621
			315	129	50		Ave.	74.0695	56.7892		241	129	Ave.	53.5931								316				35.9468	40.97	7.88667	15.1966
				%Nav1.2/TBR1							%TBR1/Nav1.2
				1	2	3	Ave.				1	2	3	Ave.
			L2/3	66.6667	75	80.4348	74.0338			L2/3	30	18.9189	26.8116	25.2435
			L5	46.6667	66.6667	78.0488	63.794			L5	57.4074	51.6129	41.0256	50.0153
			L6		63.2075	84.9315	74.0695			L6		56.7797	50.4065	53.5931
				%AnkG+/TBR1
				1	2	3	Ave.		cells
			L2/3	51.4286	49.1228	58.9744	53.1752		205
			L5	48.3871	52.1739	62.1212	54.2274		220
			L6		56.9892	56.5891	56.7892		315

## Sheet: in_2A, in_TBR1
	%Nav1.2/TBR1							%TBR1/Nav1.2
1R1	1	2	3	Ave.			1R1	1	2	3	Ave.
L2/3	53.6585	74.4186	59.0909	62.3894			L2/3	32.3529	35.9551	36.1111	34.8064
L5	76.4706	67.5676	66.6667	70.2349			L5	48.1481	56.8182	59.5745	54.8469
L6	75	56.9444	51.9481	61.2975			L6	68.8525	61.194	63.4921	64.5129
																						Cell Num.	TBR1+	TBR1+		Nav1.2+	Nav1.2+
	%Nav1.2/TBR1							%TBR1/Nav1.2															AnkG+/Nav1.2+	AnkG+/Nav1.2-		AnkG+/TBR1-	AnkG+/TBR1+
4R1	1	2	3	平均			4R1	1	2	3	Ave.											1R1 L2/3	80	48		229	80
L2/3	72.2222	74.0741	67.6471	71.3145			L2/3	20.6349	28.9855	26.4368	25.3524											4R1 L2/3	56	23		219	56
L5	72.2222	72	74.1935	72.8053			L5	48.1481	56.25	56.0976	53.4986											6R L2/3	82	28		329	82
L6	68.8889	63.6364	79.4872	70.6708			L6	77.5	70	59.6154	69.0385												218	99		777	218
																							317			995
	%Nav1.2/TBR1							%TBR1/Nav1.2
6R	1	2	3	Ave.			6R	1	2	3	Ave.
L2/3	66.6667	75	80.4348	74.0338				30	18.9189	26.8116	25.2435											Cell Num.	TBR1+	TBR1+		Nav1.2+	Nav1.2+
L5	46.6667	66.6667	78.0488	63.794				57.4074	51.6129	41.0256	50.0153												AnkG+/Nav1.2+	AnkG+/Nav1.2-		AnkG+/TBR1-	AnkG+/TBR1+
L6	nd	63.2075	84.9315	74.0695					56.7797	50.4065	53.5931											1R1 L5	79	34		145	79
																						4R1 L5	54	20		100	54
																						6R L5	78	41		194	95
																							211	95		439	228
																							306			667
	%Nav1.2+/TBR1					SEM	%TBR1+/Nav1.2						SEM									Cell Num.	TBR1+	TBR1+		Nav1.2+	Nav1.2+
	1R1	4R1	6R	Ave.	SD	N=3		1R1	4R1	6R	Ave.	SD	N=3										AnkG+/Nav1.2+	AnkG+/Nav1.2-		AnkG+/TBR1-	AnkG+/TBR1+
L2/3	62.3894	71.3145	74.0338	69.2459	6.09161	3.51699	L2/3	34.8064	25.3524	25.2435	28.4674	5.48996	3.16963									1R1 L6	123	82		191	123
L5	70.2349	72.8053	63.794	68.9447	4.64209	2.68011	L5	54.8469	53.4986	50.0153	52.7869	2.49318	1.43944									4R1 L6	97	42		142	97
L6	61.2975	70.6708	74.0695	68.6793	6.61482	3.81907	L6	64.5129	69.0385	53.5931	62.3815	7.94022	4.58429									6R L6	129	50		241	129
																							349	174		574	349
																							523			923
																						%AnkG+/TBR1	cells
																							4L	244L	246R
																						L2/3	185	119	205	509
																						L5	187	175	220	582
																						L6	376	307	315	998
			Supplementary figure S12-upper-right							Supplementary figure S12-upper-middle						Supplementary figure S12-lower
				%Nav1.2/TBR1							%TBR1/Nav1.2						%AnkG+/TBR1
			L2/3	69.2459	30.7541					L2/3	28.4674	71.5326				L2/3	62.8819	37.1181
			L5	68.9447	31.0553					L5	52.7869	47.2131				L5	52.1565	47.8435
			L6	68.6793	31.3207					L6	62.3815	37.6185				L6	52.3023	47.6977
	%AnkG+/TBR1					SEM	cells
	1R1	4R1	6R	Ave.	SD	N=3
L2/3	69.3198	66.1508	53.1752	62.8819	8.55426	4.93881	509
L5	60.4386	41.8035	54.2274	52.1565	9.48856	5.47822	582
L6	54.4789	45.6387	56.7892	52.3023	5.88528	3.39787	998

## Sheet: total
	%													cells			AnkG+
1R1	Nav1.2+,TBR1-	Nav1.2+,TBR1+	Nav1.2-,TBR1-	Nav1.2-,TBR1+					Nav1.2+,TBR1-	Nav1.2+,TBR1+	Nav1.2-,TBR1-	Nav1.2-,TBR1+		N=			Nav1.2+,TBR1+/-		TBR1+,Nav1.2+/-		Nav1.2-,TBR1+/-		TBR1-,Nav1.2+/-
L2/3	50.4524	26.9817	6.08059	16.4853			L2/3	1R1	50.4524	26.9817	6.08059	16.4853		295	L2/3	1R1	77.4341		43.467		22.5659		56.533
L5	31.3552	37.6263	14.7727	16.2458				4R1	60.4219	20.4835	10.85	8.24457		272		4R1	80.9054		28.7281		19.0946		71.2719
L6	22.6046	41.4321	9.48995	26.4734				6R	61.2154	20.4521	10.9347	7.39772		400		6R	81.6676		27.8498		18.3324		72.1502
								Ave.	57.3632	22.6391	9.28845	10.7092				Ave.	80.0023		33.3483		19.9977		66.6517
								SD	5.99811	3.76082	2.77841	5.02017				SD	2.2566		8.77406		2.2566		8.77406
	%							SEM	3.46301	2.17131	1.60412	2.89839				SEM	1.30285		5.06571		1.30285		5.06571
4R1	Nav1.2+,TBR1-	Nav1.2+,TBR1+	Nav1.2-,TBR1-	Nav1.2-,TBR1+
L2/3	60.4219	20.4835	10.85	8.24457					Nav1.2+,TBR1-	Nav1.2+,TBR1+	Nav1.2-,TBR1-	Nav1.2-,TBR1+					Nav1.2+,TBR1+/-		TBR1+,Nav1.2+/-		Nav1.2-,TBR1+/-		TBR1-,Nav1.2+/-
L5	29.7258	34.1785	23.3251	12.7706			L5	1R1	31.3552	37.6263	14.7727	16.2458		210	L5	1R1	68.9815		53.8721		31.0185		46.1279
L6	20.8858	44.9399	15.008	19.1663				4R1	29.7258	34.1785	23.3251	12.7706		157		4R1	63.9043		46.9491		36.0957		53.0509
								6R	32.6922	31.9602	21.396	13.9517		300		6R	64.6524		45.9118		35.3476		54.0882
								Ave.	31.2578	34.5883	19.8313	14.3227				Ave.	65.8461		48.911		34.1539		51.089
	%							SD	1.48559	2.85519	4.48575	1.76707				SD	2.74098		4.3276		2.74098		4.3276
6R	Nav1.2+,TBR1-	Nav1.2+,TBR1+	Nav1.2-,TBR1-	Nav1.2-,TBR1+				SEM	0.857707	1.64844	2.58985	1.02022				SEM	1.58251		2.49854		1.58251		2.49854
L2/3	61.2154	20.4521	10.9347	7.39772					Nav1.2+,TBR1-	Nav1.2+,TBR1+	Nav1.2-,TBR1-	Nav1.2-,TBR1+					Nav1.2+,TBR1+/-		TBR1+,Nav1.2+/-		Nav1.2-,TBR1+/-		TBR1-,Nav1.2+/-
L5	32.6922	31.9602	21.396	13.9517			L6	1R1	22.6046	41.4321	9.48995	26.4734		301	L6	1R1	64.0367		67.9055		35.9633		32.0945
L6	35.9468	40.97	7.88667	15.1966				4R1	20.8858	44.9399	15.008	19.1663		216		4R1	65.8257		64.1062		34.1743		35.8938
								6R	35.9468	40.97	7.88667	15.1966		316		6R	76.9167		56.1666		23.0833		43.8334
								Ave.	26.4791	42.4473	10.7949	20.2788				Ave.	68.9264		62.7261		31.0736		37.2739
								SD	8.24419	2.17095	3.73572	5.72009				SD	6.97743		5.98991		6.97743		5.98991
								SEM	4.75979	1.2534	2.15682	3.3025				SEM	4.02842		3.45827		4.02842		3.45827
									SEM
			%	Nav1.2+,TBR1+	Nav1.2+,TBR1-	Nav1.2-,TBR1+	Nav1.2-,TBR1-		Nav1.2+,TBR1-	Nav1.2+,TBR1+	Nav1.2-,TBR1-	Nav1.2-,TBR1+
			L2/3	22.6391	57.3632	10.7092	9.28845		3.46301	2.17131	1.60412	2.89839		967
			L5	34.5883	31.2578	14.3227	19.8313		0.857707	1.64844	2.58985	1.02022		667
			L6	42.4473	26.4791	20.2788	10.7949		4.75979	1.2534	2.15682	3.3025		833
			Supplementary figure S12-left
			%	Nav1.2+,TBR1+	Nav1.2-,TBR1+	Nav1.2+,TBR1-	Nav1.2-,TBR1-
			L2/3	22.6391	10.7092	57.3632	9.28845
			L5	34.5883	14.3227	31.2578	19.8313
			L6	42.4473	20.2788	26.4791	10.7949
