# Supplementary material for: Scn1a-GFP transgenic mouse revealed Nav1.1 expression in neocortical pyramidal tract projection neurons
Source: eLife. 2023 May 23;12:e87495. doi: 10.7554/eLife.87495 (PMC10205085; doi:10.7554/eLife.87495)
Supplement: Figure 14—figure supplement 3—source data 1. [file elife-87495-fig14-figsupp3-data1.xlsx]

## Sheet: 6R
6R_1st				N=99	Factor =			adjusted values			6R_1st				N=61	Factor =			adjusted values			6R_1st				N=123	Factor =				adjusted values
Layer 2/3	TBR1+	Nav1.2	GFP	Num. of neurons	0.63	(%)	% GFP+/Nav1.2+	(%)	% GFP+/Nav1.2+		Layer 5	TBR1+	Nav1.2	GFP	Num. of neurons	0.52	(%)	% GFP+/Nav1.2+	(%)	% GFP+/Nav1.2+		Layer 6	TBR1+	Nav1.2	GFP	Num. of neurons	0.52	(%)	% GFP+/Nav1.2+		(%)
	+	+	+	15	15	15.1515	40.5405	19.7368	40.5405			+	+	+	12	12	19.6721	57.1429	28.5714	57.1429			+	+	+	2	2	1.62602	8.69565		2.66667
	+	+	-	22	22	22.2222		28.9474				+	+	-	9	9	14.7541		21.4286				+	+	-	21	21	17.0732			28
	+	-	+	24	15	24.2424		19.7368				+	-	+	12	6	19.6721		14.2857				+	-	+	9	5	7.31707			6.66667
	+	-	-	38	24	38.3838		31.5789				+	-	-	28	15	45.9016		35.7143				+	-	-	91	47	73.9837			62.6667
				99	76										61	42										123	75
6R_2nd				N=57											N=46											N=98
Layer 2/3	TBR1+	Nav1.2	GFP	Num. of neurons		(%)		(%)			Layer 5	TBR1+	Nav1.2	GFP	Num. of neurons		(%)		(%)			Layer 6	TBR1+	Nav1.2	GFP	Num. of neurons		(%)			(%)
	+	+	+	10	10	17.5439	47.619	23.2558	47.619			+	+	+	8	8	17.3913	61.5385	26.6667	61.5385			+	+	+	6	6	6.12245	20		9.23077
	+	+	-	11	11	19.2982		25.5814				+	+	-	5	5	10.8696		16.6667				+	+	-	24	24	24.4898			36.9231
	+	-	+	23	14	40.3509		32.5581				+	-	+	13	7	28.2609		23.3333				+	-	+	8	4	8.16327			6.15385
	+	-	-	13	8	22.807		18.6047				+	-	-	20	10	43.4783		33.3333				+	-	-	60	31	61.2245			47.6923
				57	43										46	30										98	65
6R_3rd				N=44											N=44											N=99
Layer 2/3	TBR1+	Nav1.2	GFP	Num. of neurons		(%)		(%)			Layer 5	TBR1+	Nav1.2	GFP	Num. of neurons		(%)		(%)			Layer 6	TBR1+	Nav1.2	GFP	Num. of neurons		(%)			(%)
	+	+	+	6	6	13.6364	40	18.1818	40			+	+	+	5	5	11.3636	27.7778	16.129	27.7778			+	+	+	7	7	7.07071	20.5882		10.2941
	+	+	-	9	9	20.4545		27.2727				+	+	-	13	13	29.5455		41.9355				+	+	-	27	27	27.2727			39.7059
	+	-	+	16	10	36.3636		30.303				+	-	+	10	5	22.7273		16.129				+	-	+	6	3	6.06061			4.41176
	+	-	-	13	8	29.5455		24.2424				+	-	-	16	8	36.3636		25.8065				+	-	-	59	31	59.596			45.5882
				44	33										44	31										99	68
adjusted values											adjusted values											adjusted values
6R
L2/3	1st	2nd	3rd	Ave.							L5	1st	2nd	3rd	Ave.							L6	1st	2nd	3rd	Ave.
TBR1+, Nav1.2+, GFP+	19.7368	23.2558	18.1818	20.3915							TBR1+, Nav1.2+, GFP+	28.5714	26.6667	16.129	23.789							TBR1+, Nav1.2+, GFP+	2.66667	9.23077	10.2941	7.39718
TBR1+, Nav1.2+, GFP-	28.9474	25.5814	27.2727	27.2672							TBR1+, Nav1.2+, GFP-	21.4286	16.6667	41.9355	26.6769							TBR1+, Nav1.2+, GFP-	28	36.9231	39.7059	34.8763
TBR1+, Nav1.2-, GFP+	19.7368	32.5581	30.303	27.5327							TBR1+, Nav1.2-, GFP+	14.2857	23.3333	16.129	17.916							TBR1+, Nav1.2-, GFP+	6.66667	6.15385	4.41176	5.74409
TBR1+, Nav1.2-, GFP-	31.5789	18.6047	24.2424	24.8087							TBR1+, Nav1.2-, GFP-	35.7143	33.3333	25.8065	31.618							TBR1+, Nav1.2-, GFP-	62.6667	47.6923	45.5882	51.9824

## Sheet: 1R1
1R1_1st				N=37	Factor =			adjusted values		1R1_1st				N=62	Factor =			adjusted values		1R1_1st				N=94	Factor =			adjusted values
Layer 2/3	TBR1+	Nav1.2	GFP	Num. of neurons	0.63	(%)	% GFP+/TBR1;Nav1.2+	(%)		Layer 5	TBR1+	Nav1.2	GFP	Num. of neurons	0.52	(%)	% GFP+/Nav1.2+	(%)		Layer 6	TBR1+	Nav1.2	GFP	Num. of neurons	0.52	(%)	% GFP+/Nav1.2+	(%)
	+	+	+	20	20	54.0541	80	60.6061			+	+	+	1	1	1.6129	5	2.38095			+	+	+	2	2	2.12766	6.89655	3.1746
	+	+	-	5	5	13.5135		15.1515			+	+	-	19	19	30.6452		45.2381			+	+	-	27	27	28.7234		42.8571
	+	-	+	4	3	10.8108		9.09091			+	-	+	5	3	8.06452		7.14286			+	-	+	1	1	1.06383		1.5873
	+	-	-	8	5	21.6216		15.1515			+	-	-	37	19	59.6774		45.2381			+	-	-	64	33	68.0851		52.381
				37	33									62	42									94	63
1R1_2nd				N=34			60.6061							N=56										N=92
Layer 2/3	TBR1+	Nav1.2	GFP	Num. of neurons		(%)		(%)		Layer 5	TBR1+	Nav1.2	GFP	Num. of neurons		(%)		(%)		Layer 6	TBR1+	Nav1.2	GFP	Num. of neurons		(%)		(%)
	+	+	+	7	7	20.5882	58.3333	26.9231			+	+	+	3	3	5.35714	12.5	7.5			+	+	+	0	0	0	0	0
	+	+	-	5	5	14.7059		19.2308			+	+	-	21	21	37.5		52.5			+	+	-	29	29	31.5217		46.7742
	+	-	+	16	10	47.0588		38.4615			+	-	+	10	5	17.8571		12.5			+	-	+	6	3	6.52174		4.83871
	+	-	-	6	4	17.6471		15.3846			+	-	-	22	11	39.2857		27.5			+	-	-	57	30	61.9565		48.3871
				34	26									56	40									92	62
1R1_3rd				N=42										N=55										N=98
Layer 2/3	TBR1+	Nav1.2	GFP	Num. of neurons		(%)		(%)		Layer 5	TBR1+	Nav1.2	GFP	Num. of neurons		(%)		(%)		Layer 6	TBR1+	Nav1.2	GFP	Num. of neurons		(%)		(%)
	+	+	+	13	13	30.9524	72.2222	39.3939			+	+	+	3	3	5.45455	17.6471	8.10811			+	+	+	5	5	5.10204	13.5135	7.24638
	+	+	-	5	5	11.9048		15.1515			+	+	-	14	14	25.4545		37.8378			+	+	-	32	32	32.6531		46.3768
	+	-	+	14	9	33.3333		27.2727			+	-	+	10	5	18.1818		13.5135			+	-	+	6	3	6.12245		4.34783
	+	-	-	10	6	23.8095		18.1818			+	-	-	28	15	50.9091		40.5405			+	-	-	55	29	56.1224		42.029
				42	33									55	37									98	69
	61
adjusted values										adjusted values										adjusted values
1R1
L2/3	1st	2nd	3rd	Ave.						L5	1st	2nd	3rd	Ave.						L6	1st	2nd	3rd	平均
TBR1+, Nav1.2+, GFP+	60.6061	26.9231	39.3939	42.3077						TBR1+, Nav1.2+, GFP+	2.38095	7.5	8.10811	5.99635						TBR1+, Nav1.2+, GFP+	3.1746	0	7.24638	3.47366
TBR1+, Nav1.2+, GFP-	15.1515	19.2308	15.1515	16.5113						TBR1+, Nav1.2+, GFP-	45.2381	52.5	37.8378	45.192						TBR1+, Nav1.2+, GFP-	42.8571	46.7742	46.3768	45.336
TBR1+, Nav1.2-, GFP+	9.09091	38.4615	27.2727	24.9417						TBR1+, Nav1.2-, GFP+	7.14286	12.5	13.5135	11.0521						TBR1+, Nav1.2-, GFP+	1.5873	4.83871	4.34783	3.59128
TBR1+, Nav1.2-, GFP-	15.1515	15.3846	18.1818	16.2393						TBR1+, Nav1.2-, GFP-	45.2381	27.5	40.5405	37.7595						TBR1+, Nav1.2-, GFP-	52.381	48.3871	42.029	47.599

## Sheet: 4R1
4R1_1st				N=59	Factor =			adjusted values		1R1_1st				N=55	Factor =			adjusted values		1R1_1st				N=94	Factor =			adjusted values
Layer 2/3	TBR1+	Nav1.2	GFP	Num. of neurons	0.63	(%)	% GFP+/Nav1.2+,TBR1	(%)		Layer 5	TBR1+	Nav1.2	GFP	Num. of neurons	0.52	(%)	% GFP+/Nav1.2+,TBR1	(%)		Layer 6	TBR1+	Nav1.2	GFP	Num. of neurons	0.52	(%)	% GFP+/Nav1.2+	(%)
	+	+	+	12	12	20.339	66.6667	27.2727			+	+	+	4	4	7.27273	23.5294	10.8108			+	+	+	4	4	4.25532	26.6667	7.14286
	+	+	-	6	6	10.1695		13.6364			+	+	-	13	13	23.6364		35.1351			+	+	-	11	11	11.7021		19.6429
	+	-	+	21	13	35.5932		29.5455			+	-	+	10	5	18.1818		13.5135			+	-	+	15	8	15.9574		14.2857
	+	-	-	20	13	33.8983		29.5455			+	-	-	28	15	50.9091		40.5405			+	-	-	64	33	68.0851		58.9286
				59	44									55	37									94	56
4R1_2nd				N=44										N=38										N=98
Layer 2/3	TBR1+	Nav1.2	GFP	Num. of neurons		(%)		(%)		Layer 5	TBR1+	Nav1.2	GFP	Num. of neurons		(%)		(%)		Layer 6	TBR1+	Nav1.2	GFP	Num. of neurons		(%)		(%)
	+	+	+	10	10	22.7273	55.5556	29.4118			+	+	+	2	2	5.26316	12.5	7.14286			+	+	+	2	2	2.04082	7.40741	3.125
	+	+	-	8	8	18.1818		23.5294			+	+	-	14	14	36.8421		50			+	+	-	25	25	25.5102		39.0625
	+	-	+	15	9	34.0909		26.4706			+	-	+	11	6	28.9474		21.4286			+	-	+	10	5	10.2041		7.8125
	+	-	-	11	7	25		20.5882			+	-	-	11	6	28.9474		21.4286			+	-	-	61	32	62.2449		50
				44	34									38	28									98	64
4R1_3rd				N=45										N=47										N=117
Layer 2/3	TBR1+	Nav1.2	GFP	Num. of neurons		(%)		(%)		Layer 5	TBR1+	Nav1.2	GFP	Num. of neurons		(%)		(%)		Layer 6	TBR1+	Nav1.2	GFP	Num. of neurons		(%)		(%)
	+	+	+	7	7	15.5556	63.6364	21.2121			+	+	+	2	2	4.25532	20	6.89655			+	+	+	1	1	0.854701	5.55556	1.44928
	+	+	-	4	4	8.88889		12.1212			+	+	-	8	8	17.0213		27.5862			+	+	-	17	17	14.5299		24.6377
	+	-	+	20	13	44.4444		39.3939			+	-	+	13	7	27.6596		24.1379			+	-	+	16	8	13.6752		11.5942
	+	-	-	14	9	31.1111		27.2727			+	-	-	24	12	51.0638		41.3793			+	-	-	83	43	70.9402		62.3188
				45	33									47	29									117	69
	61
																				adjusted values
adjusted values										adjusted values
4R1R
L2/3	1st	2nd	3rd	平均						L5	1st	2nd	3rd	平均						L6	1st	2nd	3rd	平均
TBR1+, Nav1.2+, GFP+	27.2727	29.4118	21.2121	25.9655						TBR1+, Nav1.2+, GFP+	10.8108	7.14286	6.89655	8.28341						TBR1+, Nav1.2+, GFP+	7.14286	3.125	1.44928	3.90571
TBR1+, Nav1.2+, GFP-	13.6364	23.5294	12.1212	16.429						TBR1+, Nav1.2+, GFP-	35.1351	50	27.5862	37.5738						TBR1+, Nav1.2+, GFP-	19.6429	39.0625	24.6377	27.781
TBR1+, Nav1.2-, GFP+	29.5455	26.4706	39.3939	31.8033						TBR1+, Nav1.2-, GFP+	13.5135	21.4286	24.1379	19.6933						TBR1+, Nav1.2-, GFP+	14.2857	7.8125	11.5942	11.2308
TBR1+, Nav1.2-, GFP-	29.5455	20.5882	27.2727	25.8021						TBR1+, Nav1.2-, GFP-	40.5405	21.4286	41.3793	34.4495						TBR1+, Nav1.2-, GFP-	58.9286	50	62.3188	57.0825

## Sheet: total
		adjusted values
		6R
			L2/3	1st	2nd	3rd	Ave.			L5	1st	2nd	3rd	Ave.			L6	1st	2nd	3rd	Ave.
			TBR1+, Nav1.2+, GFP+	20.2703	23.2558	18.1818	20.5693				29.2683	26.6667	16.129	24.0213				2.7027	9.375	10.4478	7.50849
			TBR1+, Nav1.2+, GFP-	29.7297	25.5814	27.2727	27.528				21.9512	16.6667	41.9355	26.8511				28.3784	37.5	40.2985	35.3923
			TBR1+, Nav1.2-, GFP+	18.9189	32.5581	30.303	27.26				14.6341	23.3333	16.129	18.0322				6.75676	6.25	4.47761	5.82812
			TBR1+, Nav1.2-, GFP-	31.0811	18.6047	24.2424	24.6427				34.1463	33.3333	25.8065	31.0954				62.1622	46.875	44.7761	51.2711
		1R1
			L2/3	1st	2nd	3rd	Ave.			L5	1st	2nd	3rd	Ave.			L6	1st	2nd	3rd	Ave.
			TBR1+, Nav1.2+, GFP+	62.5	26.9231	40.625	43.3494				2.38095	7.5	8.33333	6.07143				3.22581	0	7.35294	3.52625
			TBR1+, Nav1.2+, GFP-	15.625	19.2308	15.625	16.8269				45.2381	52.5	38.8889	45.5423				43.5484	47.541	47.0588	46.0494
			TBR1+, Nav1.2-, GFP+	6.25	38.4615	25	23.2372				7.14286	12.5	13.8889	11.1772				1.6129	4.91803	4.41176	3.64757
			TBR1+, Nav1.2-, GFP-	15.625	15.3846	18.75	16.5865				45.2381	27.5	38.8889	37.209				51.6129	47.541	41.1765	46.7768
		4R1R
			L2/3	1st	2nd	3rd	Ave.			L5	1st	2nd	3rd	Ave.			L6	1st	2nd	3rd	Ave.
			TBR1+, Nav1.2+, GFP+	27.907	29.4118	22.5806	26.6331				11.1111	7.14286	6.89655	8.38351				7.27273	3.1746	1.47059	3.97264
			TBR1+, Nav1.2+, GFP-	13.9535	23.5294	12.9032	16.7954				36.1111	50	27.5862	37.8991				20	39.6825	25	28.2275
			TBR1+, Nav1.2-, GFP+	30.2326	26.4706	38.7097	31.8043				13.8889	21.4286	24.1379	19.8185				14.5455	7.93651	11.7647	11.4156
			TBR1+, Nav1.2-, GFP-	27.907	20.5882	25.8065	24.7672				38.8889	21.4286	41.3793	33.8989				58.1818	49.2063	61.7647	56.3843
									N=3							N=3							N=3
			L2/3	6R	1R1	4R1	Ave.	SD	SEM	L5	6R	1R1	4R1	Ave.	SD	SEM	L6	6R	1R1	4R1	Ave.	SD	SEM
			TBR1+, Nav1.2+, GFP+	20.5693	43.3494	26.6331	30.1839	11.7978	6.81148		24.0213	6.07143	8.38351	12.8254	9.76461	5.6376		7.50849	3.52625	3.97264	5.00246	2.18173	1.25962
			TBR1+, Nav1.2+, GFP-	27.528	16.8269	16.7954	20.3834	6.18737	3.57228		26.8511	45.5423	37.8991	36.7642	9.39714	5.42544		35.3923	46.0494	28.2275	36.5564	8.96779	5.17756
			TBR1+, Nav1.2-, GFP+	27.26	23.2372	31.8043	27.4338	4.28619	2.47463		18.0322	11.1772	19.8185	16.3426	4.56164	2.63366		5.82812	3.64757	11.4156	6.96375	4.00658	2.3132
			TBR1+, Nav1.2-, GFP-	24.6427	16.5865	24.7672	21.9988	4.68759	2.70638		31.0954	37.209	33.8989	34.0678	3.0603	1.76687		51.2711	46.7768	56.3843	51.4774	4.80707	2.77537
					Nav1.2+, GFP+	Nav1.2+, GFP-	Nav1.2-, GFP+	Nav1.2-, GFP-
				Layer 2/3	30.1839	20.3834	27.4338	21.9988	100
				Layer 5	12.8254	36.7642	16.3426	34.0678	100
				Layer 6	5.00246	36.5564	6.96375	51.4774	100
					Nav1.2+, GFP+	Nav1.2-, GFP+	Nav1.2+, GFP-	Nav1.2-, GFP-
				Layer 2/3	30.1839	27.4338	20.3834	21.9988
				Layer 5	12.8254	16.3426	36.7642	34.0678
				Layer 6	5.00246	6.96375	36.5564	51.4774
				SEM
				Layer 2/3	2.77537	2.47463	3.57228	2.70638
				Layer 5	5.6376	2.63366	5.42544	1.76687
				Layer 6	1.25962	2.3132	5.17756	2.77537
