# Supplementary material for: Scn1a-GFP transgenic mouse revealed Nav1.1 expression in neocortical pyramidal tract projection neurons
Source: eLife. 2023 May 23;12:e87495. doi: 10.7554/eLife.87495 (PMC10205085; doi:10.7554/eLife.87495)
Supplement: Figure 14—source data 1. [file elife-87495-fig14-data1.xlsx]

## Sheet: ctx
Layer2/3	GFP+_only	Tbr1+_only	GFP+/Tbr1+	total GFP+		Tbr1+/GFP+(%)		total TBR1+	GFP+/Tbr1+(%)				Layer5	GFP+_only	Tbr1+_only	GFP+/Tbr1+	total GFP+		Tbr1+/GFP+(%)		total TBR1+	GFP+Tbr1+(%)		GFP only	FEZF2+_only	FEZF2+:GFP+			GFP+/FEZF2+(%)
P15_1L-5	71	29	46	117		39.3162		75	61.3333				4w_2L	46	36	0	46		0		36	0		#VALUE!	100	78.2609	#VALUE!		36.9437
	66	16	72	138		52.1739		88	81.8182					36	26	1	37		2.7027		27	3.7037		0	97.2973	70.2703
					Ave.	45.7451			71.5758					50	39	0	50		0		39	0		#VALUE!	98.6486	74.2656
P15_5R-5	63	28	40	103		38.835		68	58.8235									Ave.	0.900901			1.23457		#DIV/0!	#DIV/0!	#DIV/0!
	67	18	51	118		43.2203		69	73.913				4w_5L	37	31	3	40		7.5		34	8.82353		#VALUE!	92.5	77.5
	61	12	64	125		51.2		76	84.2105					51	40	4	55		7.27273		44	9.09091		0	92.7273	72.7273
average					Ave.	44.4184		71	72.3157				average					Ave,	7.38636			8.95722		#DIV/0!	#DIV/0!	#DIV/0!
	328			601		45.0818		376	71.9457								228		4.14363		180	5.09589		0	0	0
					1st	45.7451			71.5758									1st	0.900901			1.23457		#DIV/0!	#DIV/0!	#DIV/0!
					2nd	44.4184			72.3157									2nd	7.38636			8.95722		#DIV/0!	#DIV/0!	#DIV/0!
				Ave.		45.0818			71.9457								Ave.		4.14363			5.09589		#DIV/0!	#DIV/0!	#DIV/0!
				SD		0.93808			0.523218								SD		4.58591			5.46074	L2/3
				N =		2			2								N =		2			2	1	68.2049	10.2016	21.5936
				SEM		0.663323			0.369971								SEM		3.24273			3.86133	2	71.666	17.86	10.474
																							3	78.8704	13.9365	7.19313
																								72.9138	13.9993	13.0869
Layer6	GFP+_only	Tbr1+_only	GFP+/Tbr1+	total GFP+		Tbr1+/GFP+(%)		total TBR1+	GFP+/Tbr1+(%)				Layer5						Tbr1-/GFP+(%)
P15_1L-5	28	124	35	63		55.5556		159	22.0126				P15_1L	64	56	10	74		13.5135		66	15.1515
	37	113	42	79		53.1646		155	27.0968					64	62	10	74		13.5135		72	13.8889
					Ave.	54.3601			24.5547									Ave.	13.5135			14.5202
P15_5R-5	17	167	4	21		19.0476		171	2.33918				P15_5R	72	58	0	72		0		58	0
	32	169	14	46		30.4348		183	7.65027					63	58	8	71		11.2676		66	12.1212
	28	164	16	44		36.3636		180	8.88889					54	55	5	59		8.47458		60	8.33333
average					Ave.	28.6153		178	6.29278				average					Ave.	6.58073		61.3333	6.81818
	142			253		41.4877		848	15.4237								350		10.0471		322	10.6692
					1st	54.3601			24.5547									1st	13.5135			14.5202
					2nd	28.6153			6.29278									2nd	6.58073			6.81818
				Ave.		41.4877			15.4237								Ave.		10.0471			10.6692
				SD		18.2043			12.9131								SD		4.90222			5.44615
				N =		2			2								N =		2			2
				SEM		12.8724			9.13095								SEM		3.46639			3.85101
Layer2/3	GFP+_only	Tbr1+_only	GFP+/Tbr1+	total GFP+		Tbr1+/GFP+(%)		total TBR1+	GFP/Tbr1+(%)
4w_2L-5	49	18	35	84		41.6667		53	66.0377
	35	37	48	83		57.8313		85	56.4706
	38	30	61	99		61.6162		91	67.033
					Ave.	53.7047			63.1804
4w_5L-5	42	22	32	74		43.2432		54	59.2593
	27	20	55	82		67.0732		75	73.3333
average					Ave.	55.1582			66.2963
						54.4315			64.7384
	191			422	1st	53.7047		358	63.1804
					2nd	55.1582			66.2963
				Ave.		54.4315			64.7384
				SD		1.02777			2.20325
				N =		2			2
				SEM		0.726745			1.55793
Layer6	GFP+_only	Tbr1+_only	GFP+/Tbr1+	total GFP+		Tbr1+/GFP+(%)		total TBR1+	GFP/Tbr1+(%)
4w_2L-5	11	75	36	47		76.5957		111	32.4324
	24	91	29	53		54.717		120	24.1667
	24	62	37	61		60.6557		99	37.3737
					Ave.	63.9895			31.3243
4w_5L-5	11	81	11	22		50		92	11.9565
	13	67	26	39		66.6667		93	27.957
average					Ave.	58.3333			19.9568
						61.1614			25.6405
	83			222	1st	63.9895		515	31.3243
					2nd	58.3333			19.9568
				Ave.		61.1614			25.6405
				SD		3.99951			8.03805
				N =		2			2
				SEM		2.82808			5.68376

## Sheet: P15_TBR1
Layer2/3	GFP+_only	Tbr1+_only	GFP+/Tbr1+	total GFP+	total cells	Tbr1+/GFP+(%)		total TBR1+	GFP+/Tbr1+(%)			/total cells	GFP only	TBR1+_only	TBR1+:GFP+
P15_1L-5	71	29	46	117	146	39.3162		75	61.3333				48.6301	19.863	31.5068
	66	16	72	138	154	52.1739		88	81.8182				42.8571	10.3896	46.7532
					Ave.	45.7451			71.5758				45.7436	15.1263	39.13
P15_5R-5	63	28	40	103	131	38.835		68	58.8235				48.0916	21.374	30.5344
	67	18	51	118	136	43.2203		69	73.913				49.2647	13.2353	37.5
	61	12	64	125	137	51.2		76	84.2105				44.5255	8.75912	46.7153
					Ave.	44.4184		71	72.3157				47.294	14.4562	38.2499
	328				N=2	45.0818		376	71.9457
				601	704
												L2/3
					1st	45.7451			71.5758			1st	45.7436	15.1263	39.13
					2nd	44.4184			72.3157			2nd	47.294	14.4562	38.2499
				Ave.		45.0818			71.9457			Ave.	46.5188	14.7912	38.69
				SD		0.93808			0.523218			SD	1.09624	0.473873	0.622363
				N =		2			2			N =	2	2	2
				SEM		0.663323			0.369971			SEM	0.775156	0.335079	0.440077
Layer5	GFP+_only	Tbr1+_only	GFP+/Tbr1+	total GFP+	total cells	Tbr1+/GFP+(%)		total TBR1+	GFP+Tbr1+(%)			/total cells	GFP only	TBR1+_only	TBR1+:GFP+
P15_1L	64	56	10	74	130	13.5135		66	15.1515				49.2308	43.0769	7.69231
	64	62	10	74	136	13.5135		72	13.8889				47.0588	45.5882	7.35294
					Ave.	13.5135			14.5202				48.1448	44.3326	7.52262
P15_5R	72	58	0	72	130	0		58	0				55.3846	44.6154	0
	63	58	8	71	129	11.2676		66	12.1212				48.8372	44.9612	6.20155
	54	55	5	59	114	8.47458		60	8.33333				47.3684	48.2456	4.38596
					Ave.	6.58073		61.3333	6.81818				50.5301	45.9407	3.52917
					N=2	10.0471		322	10.6692
				350	639
												L5
					1st	13.5135			14.5202			1st	48.1448	44.3326	7.52262
					2nd	6.58073			6.81818			2nd	50.5301	45.9407	3.52917
				Ave.		10.0471			10.6692			Ave.	49.3374	45.1367	5.5259
				SD		4.90222			5.44615			SD	1.68665	1.13715	2.8238
				N =		2			2			N =	2	2	2
				SEM		3.46639			3.85101			SEM	1.19264	0.804084	1.99673
Layer6	GFP+_only	Tbr1+_only	GFP+/Tbr1+	total GFP+		Tbr1+/GFP+(%)		total TBR1+	GFP+/Tbr1+(%)			/total cells	GFP only	TBR1+_only	TBR1+:GFP+
P15_1L-5	28	124	35	63	187	55.5556		159	22.0126				14.9733	66.3102	18.7166
	37	113	42	79	192	53.1646		155	27.0968				19.2708	58.8542	21.875
					Ave.	54.3601			24.5547				17.122	62.5822	20.2958
P15_5R-5	17	167	4	21	188	19.0476		171	2.33918				9.04255	88.8298	2.12766
	32	169	14	46	215	30.4348		183	7.65027				14.8837	78.6047	6.51163
	28	164	16	44	208	36.3636		180	8.88889				13.4615	78.8462	7.69231
					Ave.	28.6153		178	6.29278				12.4626	82.0935	5.44387
	142				N=2	41.4877		848	15.4237
				253	990
												L6
					1st	54.3601			24.5547			1st	17.122	62.5822	20.2958
					2nd	28.6153			6.29278			2nd	12.4626	82.0935	5.44387
					Ave.	41.4877			15.4237			Ave.	14.7923	72.3378	12.8698
					SD	18.2043			12.9131			SD	3.29472	13.7966	10.5019
					N =	2			2			N =	2	2	2
					SEM	12.8724			9.13095			SEM	2.32972	9.75568	7.42596
						Figure 14-right			Figure 14-middle				Figure 14-left
					%	Tbr1+/GFP+	Tbr1-/GFP+	%	GFP+/Tbr1+	GFP-/Tbr1+		%	GFP only	TBR1+:GFP+	TBR1+_only		SEM	GFP only	TBR1+:GFP+	TBR1+_only
					L2/3	45.0818	54.9182		71.9457	28.0543		L2/3	46.5188	38.69	14.7912			0.775156	0.440077	0.335079
					L5	10.0471	89.9529		10.6692	89.3308		L5	49.3374	5.5259	45.1367			1.19264	1.99673	0.804084
					L6	41.4877	58.5123		15.4237	84.5763		L6	14.7923	12.8698	72.3378			2.32972	7.42596	9.75568

## Sheet: 4w_TBR1
Layer2/3	GFP+_only	Tbr1+_only	GFP+/Tbr1+	total GFP+	total cells	Tbr1+/GFP+(%)		total TBR1+	GFP/Tbr1+(%)			/total cells	GFP only	TBR1+_only	TBR1+:GFP+
4w_2L-5	49	18	35	84	102	41.6667		53	66.0377				48.0392	17.6471	34.3137
	35	37	48	83	120	57.8313		85	56.4706				29.1667	30.8333	40
	38	30	61	99	129	61.6162		91	67.033				29.4574	23.2558	47.2868
						53.7047			63.1804				35.5544	23.9121	40.5335
4w_5L-5	42	22	32	74	96	43.2432		54	59.2593				43.75	22.9167	33.3333
	27	20	55	82	102	67.0732		75	73.3333				26.4706	19.6078	53.9216
						55.1582			66.2963				35.1103	21.2623	43.6275
	191			422	549
average					N=2	54.4315			64.7384
												L2/3
					1st	53.7047		358	63.1804			1st	35.5544	23.9121	40.5335
					2nd	55.1582			66.2963			2nd	35.1103	21.2623	43.6275
					Ave.	54.4315			64.7384			Ave.	35.3324	22.5872	42.0805
					SD	1.02777			2.20325			SD	0.314041	1.8737	2.18774
					N =	2			2			N =	2	2	2
					SEM	0.726745			1.55793			SEM	0.222061	1.32491	1.54697
Layer5	GFP+_only	Tbr1+_only	GFP+/Tbr1+	total GFP+	total cells	Tbr1+/GFP+(%)		total TBR1+	GFP+Tbr1+(%)			/total cells	GFP only	TBR1+_only	TBR1+:GFP+
4w_2L	46	36	0	46	82	0		36	0				56.0976	43.9024	0
	36	26	1	37	63	2.7027		27	3.7037				57.1429	41.2698	1.5873
	50	39	0	50	89	0		39	0				56.1798	43.8202	0
						0.900901			1.23457				56.4734	42.9975	0.529101
4w_5L	37	31	3	40	71	7.5		34	8.82353				52.1127	43.662	4.22535
	51	40	4	55	95	7.27273		44	9.09091				53.6842	42.1053	4.21053
						7.38636			8.95722				52.8984	42.8836	4.21794
				228	400
average					N=2	4.14363		180	5.09589
												L5
					1st	0.900901			1.23457			1st	56.4734	42.9975	0.529101
					2nd	7.38636			8.95722			2nd	52.8984	42.8836	4.21794
					Ave.	4.14363			5.09589			Ave.	54.6859	42.9406	2.37352
					SD	4.58591			5.46074			SD	2.52787	0.0805283	2.6084
					N =	2			2			N =	2	2	2
					SEM	3.24273			3.86133			SEM	1.78748	0.0569421	1.84442
Layer6	GFP+_only	Tbr1+_only	GFP+/Tbr1+	total GFP+	total cells	Tbr1+/GFP+(%)		total TBR1+	GFP/Tbr1+(%)			/total cells	GFP only	TBR1+_only	TBR1+:GFP+
4w_2L-5	11	75	36	47	122	76.5957		111	32.4324				9.01639	61.4754	29.5082
	24	91	29	53	144	54.717		120	24.1667				16.6667	63.1944	20.1389
	24	62	37	61	123	60.6557		99	37.3737				19.5122	50.4065	30.0813
						63.9895			31.3243				15.0651	58.3588	26.5761
4w_5L-5	11	81	11	22	103	50		92	11.9565				10.6796	78.6408	10.6796
	13	67	26	39	106	66.6667		93	27.957				12.2642	63.2075	24.5283
						58.3333			19.9568				11.4719	70.9242	17.604
	83			222	598
average					N=2,	61.1614			25.6405
					1st	63.9895		515	31.3243			L6
					2nd	58.3333			19.9568			1st	15.0651	58.3588	26.5761
					Ave.	61.1614			25.6405			2nd	11.4719	70.9242	17.604
					SD	3.99951			8.03805			Ave.	13.2685	64.6415	22.09
					N =	2			2			SD	2.54078	8.88506	6.34428
					SEM	2.82808			5.68376			N =	2	2	2
												SEM	1.7966	6.28269	4.48609
						Figure 14-right			Figure 14-middle				Figure 14-left
					%	Tbr1+/GFP+	Tbr1-/GFP+	%	GFP+/Tbr1+	GFP-/Tbr1+		%	GFP only	TBR1+:GFP+	TBR1+_only		SEM	GFP only	TBR1+:GFP+	TBR1+_only
				4W	L2/3	54.4315	45.5685		64.7384	35.2616		L2/3	35.3324	42.0805	22.5872			0.222061	1.54697	1.32491
					L5	4.14363	95.8564		5.09589	94.9041		L5	54.6859	2.37352	42.9406			1.78748	1.84442	0.0569421
					L6	61.1614	38.8386		25.6405	74.3595		L6	13.2685	22.09	64.6415			1.7966	4.48609	6.28269
