# Supplementary material for: Scn1a-GFP transgenic mouse revealed Nav1.1 expression in neocortical pyramidal tract projection neurons
Source: eLife. 2023 May 23;12:e87495. doi: 10.7554/eLife.87495 (PMC10205085; doi:10.7554/eLife.87495)
Supplement: Figure 15—source data 1. [file elife-87495-fig15-data1.xlsx]

## Sheet: Layer2
2L-5	4W	Layer2-3
	Size	Intensity/pixel	GFP+			Size	Intensity/pixel	GFP+
	415	63.814	TBR1-			424	40.368	TBR1+
	289	43.74	TBR1-			520	45.081	TBR1+
	419	31.177	TBR1-			345	53.725	TBR1+
	494	41.032	TBR1-			407	43.988	TBR1+
	271	47.801	TBR1-			351	54.806	TBR1+
	482	39.867	TBR1-			312	52.128	TBR1+
	427	39.201	TBR1-			369	55.68	TBR1+
	420	33.329	TBR1-			342	64.673	TBR1+
	629	45.817	TBR1-			368	49.723	TBR1+
	461	33.063	TBR1-			376	41.471	TBR1+
	505	37.15	TBR1-			357	64.02	TBR1+
	402	36.555	TBR1-			309	58.087	TBR1+
	344	26.945	TBR1-			426	78.869	TBR1+
	534	44.856	TBR1-			340	53.506	TBR1+
	248	40.319	TBR1-			376	69.386	TBR1+
	337	39.682	TBR1-			544	80.816	TBR1+
	341	32.305	TBR1-			323	60.347	TBR1+
	310	45.558	TBR1-			321	65.411	TBR1+
	496	43.02	TBR1-			474	48.88	TBR1+
	273	34.267	TBR1-			697	31.451	TBR1+
	314	50.545	TBR1-			368	50.965	TBR1+
	347	41.326	TBR1-			328	66.223	TBR1+
	557	48.513	TBR1-			526	49.327	TBR1+
	217	61.134	TBR1-			552	45.966	TBR1+
	492	54.037	TBR1-			309	52.262	TBR1+
	462	75.097	TBR1-			353	48.365	TBR1+
	360	33.722	TBR1-			512	41.543	TBR1+
	369	50.322	TBR1-			286	47.72	TBR1+
1	495	31.366	TBR1-			322	65.491	TBR1+
2	202	38.639	TBR1-			349	50.934	TBR1+
3	241	29.419	TBR1-			371	42.596	TBR1+
4	240	33.092	TBR1-			448	43.808	TBR1+
5	272	28.941	TBR1-		6	230	27.248	TBR1+
8	376	29.117	TBR1-		7	227	30.256	TBR1+
11	346	55.873	TBR1-		9	303	37.406	TBR1+
13	274	28.679	TBR1-		10	330	27.233	TBR1+
16	358	47.514	TBR1-		12	350	27.114	TBR1+
19	424	83.328	TBR1-		14	429	29.8	TBR1+
22	368	32.554	TBR1-		15	361	41.188	TBR1+
23	297	43.195	TBR1-		17	390	29.285	TBR1+
28	296	51.111	TBR1-		18	346	33.118	TBR1+
32	349	28.931	TBR1-		20	406	35.786	TBR1+
33	347	32.473	TBR1-		21	409	31.012	TBR1+
34	378	25.46	TBR1-		24	373	33.735	TBR1+
37	319	42.486	TBR1-		25	238	40.176	TBR1+
38	366	66.653	TBR1-		26	349	38.596	TBR1+
41	205	33.107	TBR1-		27	278	38.133	TBR1+
43	435	24.214	TBR1-		29	410	39.537	TBR1+
52	543	38.694	TBR1-		30	385	32.291	TBR1+
53	550	89.095	TBR1-		31	420	27.952	TBR1+
58	279	77.437	TBR1-		35	334	34.536	TBR1+
62	384	37.354	TBR1-		36	279	35.229	TBR1+
64	421	29.608	TBR1-		39	352	34.659	TBR1+
3	383	30.266	TBR1-		40	301	36.246	TBR1+
4	354	28.684	TBR1-		42	492	40.01	TBR1+
5	413	39.671	TBR1-		44	327	30.398	TBR1+
7	435	28.926	TBR1-		45	400	42.015	TBR1+
12	326	26.574	TBR1-		46	299	44.227	TBR1+
13	361	32.992	TBR1-		47	386	28.541	TBR1+
18	302	49.646	TBR1-		48	269	29.874	TBR1+
19	495	79.754	TBR1-		49	343	44.434	TBR1+
21	279	32.667	TBR1-		50	364	45.404	TBR1+
25	402	59.391	TBR1-		51	423	50.234	TBR1+
31	299	26.311	TBR1-		54	272	35.184	TBR1+
32	351	36.695	TBR1-		55	238	30.109	TBR1+
37	364	49.481	TBR1-		56	343	41.551	TBR1+
39	522	50.042	TBR1-		57	288	38.545	TBR1+
40	389	29.098	TBR1-		59	277	39.318	TBR1+
47	582	63.318	TBR1-		60	338	28.624	TBR1+
52	255	41.325	TBR1-		61	321	41.866	TBR1+
55	334	75.988	TBR1-		63	309	52.744	TBR1+
56	357	59.577	TBR1-		65	315	32.114	TBR1+
61	392	73.605	TBR1-		66	309	40.579	TBR1+
63	320	55.878	TBR1-		1	344	30.471	TBR1+
Ave.	376.959	43.8165			2	435	35.354	TBR1+
					6	574	34.239	TBR1+
					8	351	40.792	TBR1+
T-test	0.752697	0.292228			9	520	34.037	TBR1+
					10	365	35.342	TBR1+
	Size	Intensity/pixel			11	276	34.804	TBR1+
					14	377	27.682	TBR1+
					15	421	39.173	TBR1+
					16	569	28.209	TBR1+
					17	353	35.244	TBR1+
					20	451	35.33	TBR1+
					22	442	30.455	TBR1+
					23	287	36.721	TBR1+
					24	412	32.728	TBR1+
					26	344	42.619	TBR1+
					27	472	29.032	TBR1+
					28	420	37.055	TBR1+
					29	396	40.967	TBR1+
					30	333	28.946	TBR1+
					33	503	44.41	TBR1+
					34	435	39.954	TBR1+
					35	451	35.157	TBR1+
					36	464	46.274	TBR1+
					38	340	55.159	TBR1+
					41	284	28.602	TBR1+
					42	342	59.819	TBR1+
					43	330	36.309	TBR1+
					44	347	53.098	TBR1+
					45	374	37.425	TBR1+
					46	357	48.02	TBR1+
					48	378	38.241	TBR1+
					49	306	29.935	TBR1+
					50	455	56.53	TBR1+
					51	323	30.625	TBR1+
					53	515	45.037	TBR1+
					54	359	34.652	TBR1+
					57	321	40.131	TBR1+
					58	323	39.625	TBR1+
					59	345	34.171	TBR1+
					60	335	41.6	TBR1+
					62	338	44.586	TBR1+
					Ave.	372.913	41.7607
				% TBR1/GFP	60.8466

## Sheet: Layer5
2L-5	4W	Layer5
		Size	Intensity/pixel	GFP+			Size	Intensity/pixel	GFP+
	1	381	44.64	TBR1-		6	462	30.405	TBR1+
	2	391	49.985	TBR1-		21	243	31.07	TBR1+
	3	397	54.353	TBR1-		22	367	48.651	TBR1+
	4	499	41.796	TBR1-		31	205	29.371	TBR1+
	5	717	42.123	TBR1-		33	164	28.116	TBR1+
	7	438	60.541	TBR1-		34	225	53.409	TBR1+
	8	290	54.41	TBR1-		42	260	28.569	TBR1+
	9	611	49.372	TBR1-		43	303	40.241	TBR1+
	10	487	57.577	TBR1-		44	204	34.789	TBR1+
	11	408	40.767	TBR1-		7	471	45.781	TBR1+
	12	383	58.305	TBR1-		15	200	29.215	TBR1+
	13	305	39.6	TBR1-		28	333	43.324	TBR1+
	14	420	53.779	TBR1-		34	402	26.002	TBR1+
	15	249	34.936	TBR1-		37	338	38.287	TBR1+
	16	456	37.634	TBR1-		17	328	39.744	TBR1+
	17	737	40.658	TBR1-		20	418	27.232	TBR1+
	18	588	37.342	TBR1-		21	454	46.181	TBR1+
	19	441	62.728	TBR1-		24	454	36.22	TBR1+
	20	209	34.368	TBR1-		25	483	30.36	TBR1+
	23	396	65.659	TBR1-		26	355	33.141	TBR1+
	24	389	34.725	TBR1-		27	362	39.892	TBR1+
	25	213	32.915	TBR1-		33	394	32.434	TBR1+
	26	401	37.459	TBR1-		Ave.	337.5	36.0197
	27	182	41.929	TBR1-
	28	289	34.059	TBR1-
	29	522	62.69	TBR1-	18.6441
	30	393	27.468	TBR1-		N=	22
	32	495	31.721	TBR1-
	35	411	84.864	TBR1-
	36	493	34.041	TBR1-
	37	330	29.933	TBR1-
	38	260	57.892	TBR1-
	39	382	49.272	TBR1-
	40	123	24.049	TBR1-
	41	246	44.264	TBR1-
	1	409	45.677	TBR1-
	2	531	29.243	TBR1-
	3	266	38.846	TBR1-
	4	417	37.014	TBR1-
	5	410	28.98	TBR1-
	6	448	29.562	TBR1-
	8	543	26.98	TBR1-
	9	388	75.544	TBR1-
	10	374	65.142	TBR1-
	11	383	26.138	TBR1-
	12	400	29.712	TBR1-
	13	481	44.79	TBR1-
	14	544	35.509	TBR1-
	16	400	59.265	TBR1-
	17	754	35.353	TBR1-
	18	400	35.907	TBR1-
	19	480	67.89	TBR1-
	20	351	69.826	TBR1-
	21	271	40.369	TBR1-
	22	500	26.176	TBR1-
	23	552	27.342	TBR1-
	24	358	52.156	TBR1-
	25	451	33.616	TBR1-
	26	632	32.066	TBR1-
	27	439	61.005	TBR1-
	29	586	31.092	TBR1-
	30	359	23.189	TBR1-
	31	357	25.905	TBR1-
	32	616	44.391	TBR1-
	33	459	64.636	TBR1-
	35	680	29.521	TBR1-
	36	477	25.338	TBR1-
	38	388	69.43	TBR1-
	39	419	26.136	TBR1-
	40	412	61.114	TBR1-
	1	600	37.815	TBR1-
	2	600	37.815	TBR1-
	3	696	31.885	TBR1-
	4	545	34.341	TBR1-
	5	863	34.92	TBR1-
	6	441	64.635	TBR1-
	7	755	30.172	TBR1-
	8	402	32.363	TBR1-
	9	564	35.293	TBR1-
	10	630	29.53	TBR1-
	11	786	59.954	TBR1-
	12	523	56.409	TBR1-
	13	407	45.238	TBR1-
	14	730	27.69	TBR1-
	15	691	63.656	TBR1-
	16	693	57.499	TBR1-
	18	840	34.223	TBR1-
	19	719	30.469	TBR1-
	22	921	29.582	TBR1-
	23	618	53.798	TBR1-
	28	602	28.965	TBR1-
	29	473	26.748	TBR1-
	30	557	28.98	TBR1-
	31	638	25.002	TBR1-
	32	681	28.408	TBR1-
	34	391	28.018	TBR1-
	Ave.	481.594	42.0429
	T-test	8.60608e-05	0.0589324
		Size	Intensity/pixel
	N=	96

## Sheet: Layer6
2L-5	4W	Layer6
		Size	Intensity/pixel	GFP+			Size	Intensity/pixel	GFP+
	1	525	63.088	TBR1-		2	410	29.461	TBR1+
	4	261	33.697	TBR1-		3	345	68.391	TBR1+
	6	489	55.117	TBR1-		5	237	51.295	TBR1+
	15	379	44.219	TBR1-		7	469	42.1	TBR1+
	16	255	31.063	TBR1-		8	225	43.284	TBR1+
	24	318	36.472	TBR1-		9	397	34.912	TBR1+
	26	502	77.829	TBR1-		10	249	45.104	TBR1+
	27	463	78.361	TBR1-		11	368	42.079	TBR1+
	30	464	46.899	TBR1-		12	251	44.446	TBR1+
	35	482	74.959	TBR1-		13	304	38.905	TBR1+
	36	440	62.402	TBR1-		14	240	37.325	TBR1+
	38	280	49.279	TBR1-		17	401	44.519	TBR1+
	1	661	54.368	TBR1-		18	378	28.246	TBR1+
	3	633	26.414	TBR1-		19	283	39.512	TBR1+
	4	509	46.658	TBR1-		20	194	42.366	TBR1+
	6	536	39.392	TBR1-		21	247	35.377	TBR1+
	7	405	34	TBR1-		22	240	31.629	TBR1+
	9	542	66.969	TBR1-		23	167	34.707	TBR1+
	11	569	46.279	TBR1-		25	198	33.859	TBR1+
	15	522	57.372	TBR1-		28	247	36.105	TBR1+
	23	381	41.381	TBR1-		29	210	34.657	TBR1+
	25	391	53.013	TBR1-		31	210	32.119	TBR1+
	27	358	44.791	TBR1-		32	368	37.424	TBR1+
	28	367	35.779	TBR1-		33	191	36.319	TBR1+
	29	548	37.308	TBR1-		34	220	36.036	TBR1+
	30	404	38.49	TBR1-		37	248	34.198	TBR1+
	36	791	69.8	TBR1-		2	427	25.824	TBR1+
	38	477	41.451	TBR1-		5	431	39.227	TBR1+
	1	629	68.056	TBR1-		8	360	42.736	TBR1+
	12	335	39.773	TBR1-		10	337	25.472	TBR1+
	14	395	68.934	TBR1-		12	304	41.921	TBR1+
	16	382	61.911	TBR1-		13	310	44.894	TBR1+
	17	553	52.297	TBR1-		14	441	34.832	TBR1+
	19	436	59.633	TBR1-		16	321	35.268	TBR1+
	20	251	33.112	TBR1-		17	454	26.835	TBR1+
	21	773	53.079	TBR1-		18	460	26.987	TBR1+
	22	334	45.461	TBR1-		19	315	36.394	TBR1+
	24	734	85.293	TBR1-		20	230	31.678	TBR1+
	25	268	30.254	TBR1-		21	352	30.858	TBR1+
	27	513	34.789	TBR1-		22	432	27.074	TBR1+
	29	951	54.555	TBR1-		24	214	31.729	TBR1+
	Ave.	475.756	50.5853			26	353	27.646	TBR1+
						31	176	28.545	TBR1+
						32	232	30.483	TBR1+
	T-test	8.77258e-10	1.04877e-09			33	312	33.817	TBR1+
						34	281	27.544	TBR1+
						35	470	38.996	TBR1+
						37	332	29.084	TBR1+
	N=	41				2	470	48.949	TBR1+
						3	290	34.807	TBR1+
						4	410	37.134	TBR1+
						5	320	37.422	TBR1+
						6	380	31.85	TBR1+
						7	341	35.276	TBR1+
						8	315	27.768	TBR1+
						9	312	28.708	TBR1+
						10	297	33.96	TBR1+
						11	289	33.834	TBR1+
						13	380	46.434	TBR1+
						15	316	34.196	TBR1+
						18	369	38.469	TBR1+
						23	311	30.019	TBR1+
						26	421	34.81	TBR1+
						28	303	30.172	TBR1+
						Ave.	318.203	35.8754
						60.9524
						N=	64
