# Supplementary material for: Scn1a-GFP transgenic mouse revealed Nav1.1 expression in neocortical pyramidal tract projection neurons
Source: eLife. 2023 May 23;12:e87495. doi: 10.7554/eLife.87495 (PMC10205085; doi:10.7554/eLife.87495)
Supplement: Supplementary file 1. [file elife-87495-supp1.xlsx]

## Sheet: 1a
			per cells with GFP+ and/or NeuN+ somata
	Region a			% GFP+, NeuN- b	% GFP+, NeuN+ b	% GFP-, NeuN+ b
	M1	L2/3		6.8 ± 0.5	23.3 ± 0.5	70.2 ± 0.5
		L5		8.4 ± 0.6	23.8 ± 0.1	67.7 ± 1.3
		L6		6.5 ± 0.6	15.2 ± 2.2	78.3 ± 2.3
	S1	L2/3		6.7 ± 0.1	21.3 ± 2.0	72.0 ± 2.1
		L5		10.2 ± 0.9	22.6 ± 2.1	67.1 ± 1.3
		L6		5.9 ± 0.7	11.7 ± 1.8	82.4 ± 1.8
	Supplementary File 1a. Percentage of cells with GFP- and/or NeuN-positive somata among cells with GFP- and/or NeuN-positive somata in Scn1a-GFP mouse neocortex. Values for Figure 3-figure supplement 2B. aM1, S1, L2/3, L5, L6: primary motor cortex, primary somatosensory cortex, neocortical layer II/III, V, VI. Cells in three Scn1a-GFP mice (line #233) at P15 were counted; bL2/3 (M1; N = 2599 cells…

## Sheet: 1b
			per cells with AnkG+ AISs
	Region a		% GFP+ b				% GFP- b
	L2/3		16.6 ± 1.9				83.4 ± 1.9
	L5		21.4 ± 3.3				78.6 ± 3.3
	L6		7.9 ± 1.7				92.1 ± 1.7
			% Nav1.1+		% Nav1.1-		% Nav1.1+		% Nav1.1-
	L2/3		5.5 ± 1.1		11.1 ± 0.8		0.2 ± 0.1		83.4 ± 2.0
	L5		8.0 ± 0.2		13.4 ± 3.3		0.2 ± 0.1		78.7 ± 3.1
	L6		3.7 ± 0.5		4.2 ± 1.3		0.1 ± 0.1		92.0 ± 1.6
	Supplementary File 1b. Percentage of cells with GFP- and Nav1.1-positive/negative somata and AISs per cells with ankyrinG-positive AISs in Scn1a-GFP mouse neocortex. Values for Figure 4D-left panel. aL2/3, L5, L6: neocortical layer II/III, V, VI. Cells in three Scn1a-GFP mice (line #233) at P15 were counted; bL2/3 (N = 1412 cells), L5 (N = 1054 cells), and L6 (N = 1481 cells). Values are presente…

## Sheet: 1c
			per cells with AnkG+ AISs and Nav1.1+ somata and/or AISs
	Region a		% GFP+ b		% GFP- b
	L2/3		98.5 ± 0.8		1.55 ± 0.8
	L5		98.7 ± 0.6		1.27 ± 0.6
	L6		97.2 ± 2.8		2.82 ± 2.8
	Supplementary File 1c. Percentage of cells with GFP-positive/negative somata per cells with ankyrinG-positive AISs and Nav1.1-positive somata and/or AISs in Scn1a-GFP mouse neocortex. Values for Figure 4D-middle panel. aL2/3, L5, L6: neocortical layer II/III, V, VI. Cells in three Scn1a-GFP mice (line #233) at P15 were counted; bL2/3 (N = 108 cells), L5 (N = 124 cells), and L6 (N = 82 cells). Val…

## Sheet: 1d
			per cells with AnkG+ AISs and GFP+ somata
	Region a		% Nav1.1+ b		% Nav1.1- b
	L2/3		32.8 ± 3.5		67.2 ± 3.5
	L5		39.9 ± 6.4		60.1 ± 6.4
	L6		49.5 ± 8.4		50.5 ± 8.4
	Supplementary File 1d. Percentage of cells with GFP-positive/negative somata per cells with ankyrinG-positive AISs and Nav1.1+ somata and/or AISs in Scn1a-GFP mouse neocortex. Values for Figure 4D-right panel. aL2/3, L5, L6: neocortical layer II/III, V, VI. Cells in three Scn1a-GFP mice (line #233) at P15 were counted; bL2/3 (N = 229 cells), L5 (N = 220 cells), and L6 (N = 111 cells). Values are …

## Sheet: 1e
		per cells with AnkG+ AISs
	Region a	% GFP+ b	% GFP- b
	L2/3	30.0 ± 1.1	70.0 ± 1.1
	L5	26.4 ± 1.6	73.6 ± 1.6
	L6	9.0 ± 1.0	91.0 ± 1.0
	Supplementary File 1e. Percentage of cells with GFP-positive/negative somata per cells with ankyrinG-positive AISs in Scn1a-GFP mouse neocortex. Values for Figure 4-figure supplement 1. aL2/3, L5, L6: neocortical layer II/III, V, VI. Cells in three Scn1a-GFP mice (line #233) at P15 were counted; bL2/3 (N = 1787 cells), L5 (N = 1450 cells), and L6 (N = 2330 cells). Values are presented as mean ± S…

## Sheet: 1f
				Nav1.1/GFP/AnkG		Nav1.2/GFP/AnkG
	Region a		% GFP+/AnkG+ AIS b	% GFP+/AnkG+ AIS b		% GFP+/AnkG+ AIS b	Average		SEM
	L2/3		30	16.6		22.6	23.1		3.9
	L5		26.4	21.4		30.2	26		2.5
	L6		9	7.9		20.7	12.5		4.1
	Supplementary File 1f. Percentage of cells with GFP-positive somata per cells with ankyrinG-positive AISs in the three different assessments. Values for Figure 4-figure supplement 2. aL2/3, L5, L6: neocortical layer II/III, V, VI. bValues indicate that percentage of GFP positive cells in Figure 4-figure supplement 1B, Figure 4D-left panel and Figure 11B-left panel, respectively. AnkG, ankyrinG; +…

## Sheet: 1g
			per cells with GFP+ somata and AnkG+ AISs
	Region a		% Nav1.1+ b		% Nav1.1- b
	CA1		98.3 ± 0.9		1.7 ± 0.9
	Supplementary File 1g. Percentage of cells with Nav1.1-positive/negative AISs per cells with GFP-positive somata and ankyrinG-positive AISs in Scn1a-GFP mouse hippocampus. Values for Figure 5F-left panel. aCA1: Cornu ammonis 1. bCells in three Scn1a-GFP mice (line #233) at P15 were counted (N = 117 cells). Values are presented as mean ± SEM. AnkG, ankyrinG; +, positive; -, negative.

## Sheet: 1h
			per cells with Nav1.1+ and AnkG+ AISs
	Region a		% GFP+ b		% GFP- b
	CA1		100.0 ± 0.0		0.0 ± 0.0
	Supplementary File 1h. Percentage of cells with GFP-positive/negative somata per cells with Nav1.1/ankyrinG-double positive AISs in Scn1a-GFP mouse hippocampus. Values for Figure 5F-right panel. aCA1: Cornu ammonis 1. bCells in three Scn1a-GFP mice (line #233) at P15 were counted (N = 114 cells). Values are presented as mean ± SEM. AnkG, ankyrinG; +, positive; -, negative.

## Sheet: 1i
		per cells with GFP+ somata
	Region a	%Tomato+ b	% Tomato- b
	L2/3	23.2 ± 2.4	76.8 ± 2.4
	L5	28.1 ± 0.8	71.9 ± 0.8
	L6	27.4 ± 3.3	72.6 ± 3.3
	CA1	97.9 ± 0.1	2.1 ± 0.1
	DG	93.5 ± 4.5	6.5 ± 4.5
	Supplementary File 1i. Percentage of cells with Tomato-positive/negative somata per cells with GFP-positive somata in Scn1a-GFP/Slc32a1-Cre/Ai14 mouse neocortex and hippocampus. Values for Figure 7C-left panels. aL2/3, L5, L6, CA1, DG: neocortical layer II/III, V, VI, cornu ammonis 1, dentate gyrus. Cells in two Scn1a-GFP/Slc32a1-Cre/Ai14 mice (line #233) at 4W were counted; bL2/3 (N = 882 cells)…

## Sheet: 1j
		per cells with Tomato+ somata
	Region a	%GFP+ b	% GFP- b
	L2/3	72.7 ± 5.0	27.3 ± 5.0
	L5	76.9 ± 0.0	23.1 ± 0.0
	L6	83.0 ± 5.5	17.0 ± 5.5
	CA1	93.2 ± 0.2	6.8 ± 0.2
	DG	77.2 ± 5.2	22.8 ± 5.2
	Supplementary File 1j. Percentage of cells with GFP-positive/negative somata per cells with Tomato-positive somata in Scn1a-GFP/Slc32a1-Cre/Ai14 mouse neocortex and hippocampus. Values for Figure 7C-right panels. aL2/3, L5, L6, CA1, DG: neocortical layer II/III, V, VI, cornu ammonis 1, dentate gyrus. Cells in two Scn1a-GFP/Slc32a1-Cre/Ai14 mice (line #233) at 4W were counted; bL2/3 (N = 263 cells…

[truncated: 34 more sheets: 1k, 1l, 1m, 1n, 1o, 1p, 1q, 1r, 1s, 1t, 1u, 1v, 1w, 1x, 1y, 1z, 1aa, 1ab, 1ac, 1ad …]
