# Supplementary figures and images for: Scn1a-GFP transgenic mouse revealed Nav1.1 expression in neocortical pyramidal tract projection neurons
Source: eLife journal article supplement (doi:10.7554/elife.87495), 2023-05-10

Figure 1B-source data1-1

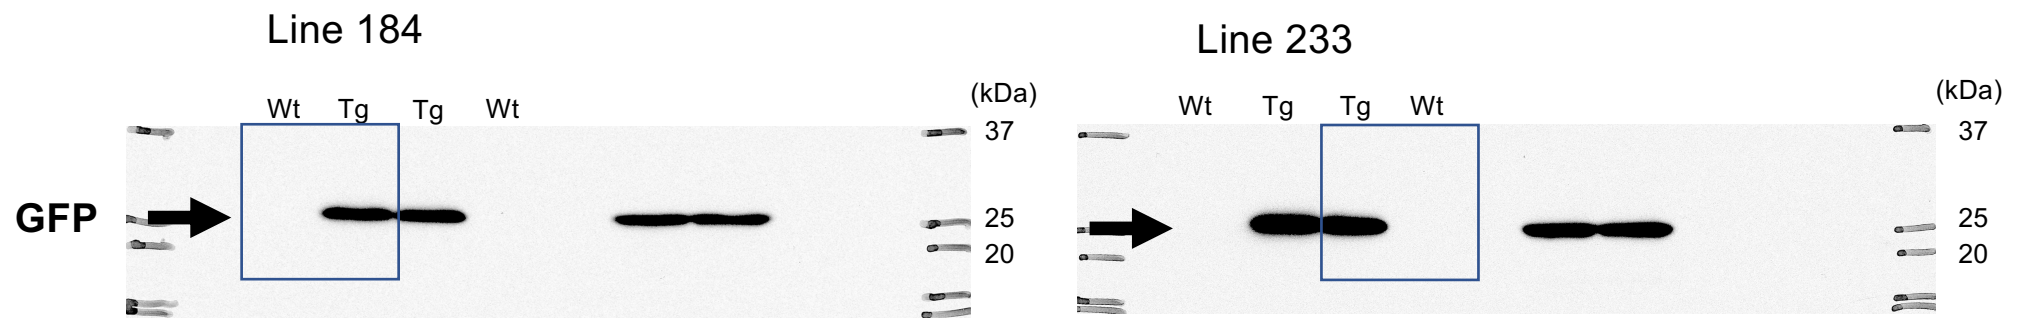

Figure 1B-source data1-2

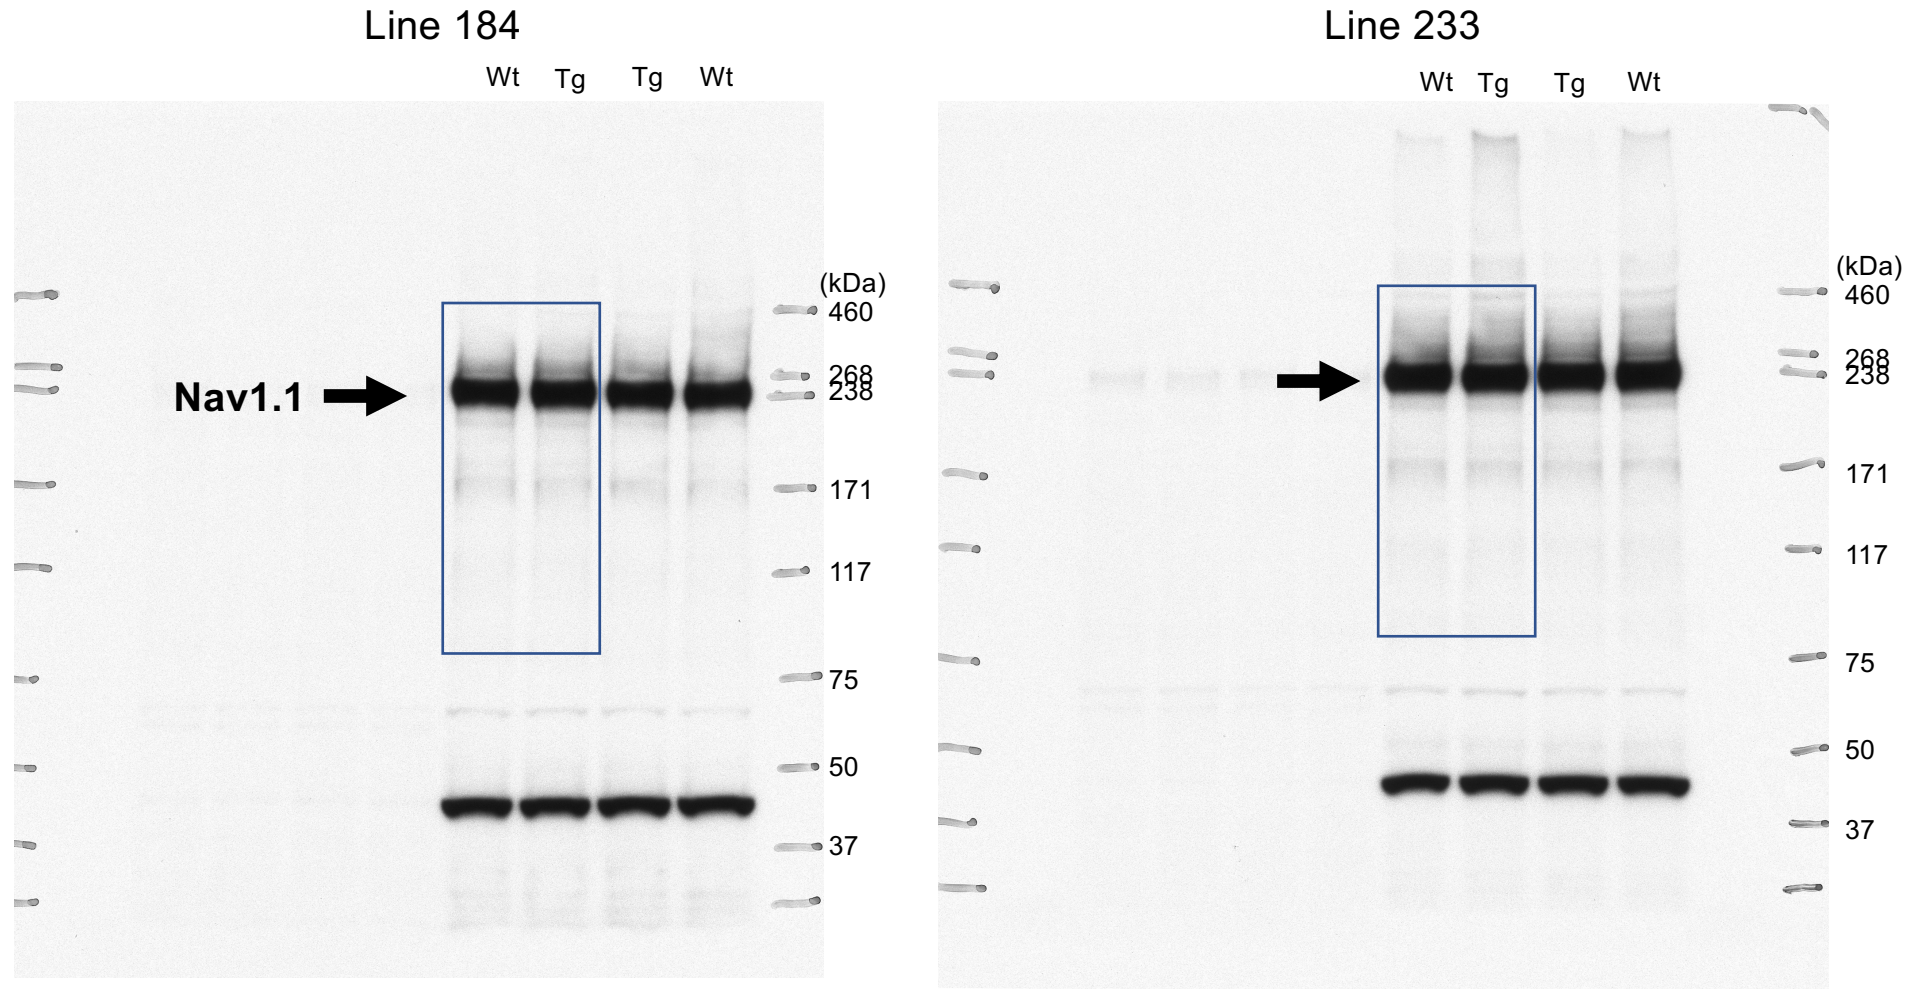

Figure 1B-source data1-3

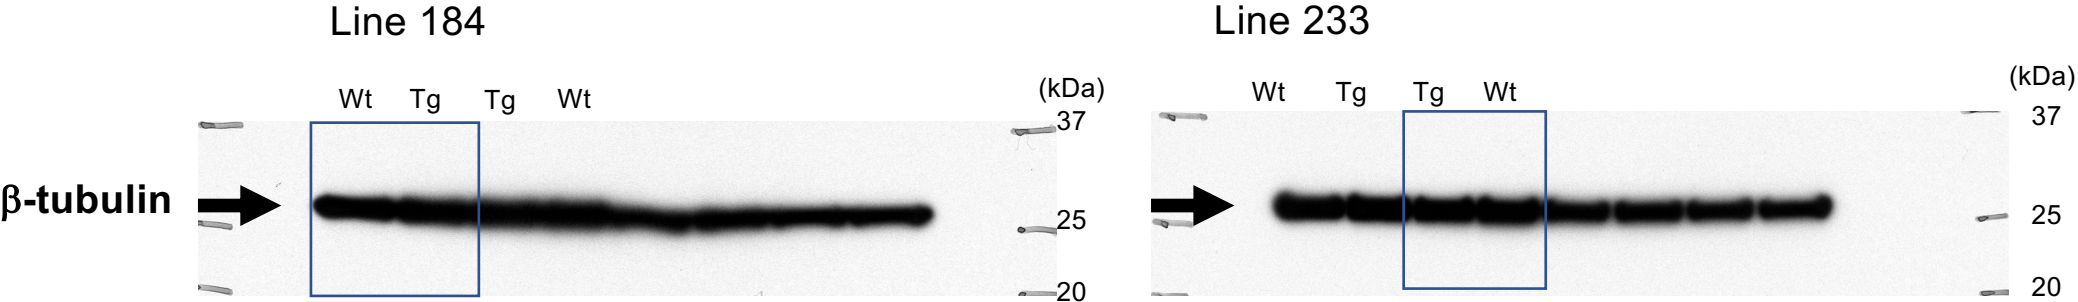

Supplement: fig1-data1 [file figure1_Source_data1.pdf › Figure1-sourse data_1/figure1_Source_data1.pdf]
